# Supplementary material
Source: HighWire-hosted journal article supplement (doi:10.1101/rna.044081.113)
Supplement: SuppTables.xlsx [file SuppTables.xlsx]

## Sheet: RBPs_RRM
Table S1.
UniProt/SwissProt ID	Associated Gene Name/UniProtKB Protein Accession	No_RRM	RRM_position	RRM_align_score(s)	PFAM ID	GO Term ID	MouseOrth	FlyOrth	WarmOrth	HumanPara
SRSF9_HUMAN	SRSF9	2	113-174, 16-83	16	PF00076	0000398 0006366 0006369 0006376 0006397 0006406 0008380 0010467 0031124 0048025 0005634 0005654 0000166 0003676 0003723	ENSMUSG00000029538(98,ortholog_one2one)	FBgn0040284(54,ortholog_one2many)	Y111B2A.18(53,ortholog_one2many)	ENSG00000136450(67,within_species_paralog); ENSG00000116350(37,within_species_paralog); ENSG00000100650(33,within_species_paralog); ENSG00000124193(36,within_species_paralog); ENSG00000112081(16,other_paralog); ENSG00000215699(13,other_paralog); ENSG00000161547(15,other_paralog); ENSG00000188529(13,other_paralog); ENSG00000115875(21,other_paralog); ENSG00000154548(12,other_paralog)
RBM46_HUMAN	RBM46	3	63-126, 143-204, 238-301	25 14 22	PF00076	0000166 0003676 0003723	ENSMUSG00000033882(96,ortholog_one2one)	FBgn0038826(31,ortholog_one2many)	F58D5.1(28,ortholog_one2many)	ENSG00000148584(50,within_species_paralog); ENSG00000163694(47,within_species_paralog); ENSG00000125944(33,within_species_paralog); ENSG00000135316(32,within_species_paralog); ENSG00000256453(20,within_species_paralog)
PM14_HUMAN	AC008073.5	1	21-87	NULL	PF00076	0000398 0008380 0010467 0005634 0005654 0005689 0000166 0003676 0003723	ENSMUSG00000037361(100,apparent_ortholog_one2one)	FBgn0035692(71,ortholog_one2one)	C50D2.5(67,ortholog_one2one)
PPIL4_HUMAN	PPIL4	1	242-312	NULL	PF00160 PF00076	0006457 0005634 0000166 0003676 0003723 0003755 0016853	ENSMUSG00000015757(97,ortholog_one2one)	FBgn0027617(51,ortholog_one2one)	F39H2.2(44,ortholog_one2one)	ENSG00000153015(20,within_species_paralog); ENSG00000166794(12,within_species_paralog); ENSG00000113593(13,within_species_paralog); ENSG00000168938(12,within_species_paralog); ENSG00000100023(14,other_paralog); ENSG00000137168(12,other_paralog); ENSG00000240344(10,other_paralog)
RAVR1_HUMAN	RAVER1	2	61-123, 135-203	25	PF00076	0005634 0005737 0000166 0003676 0003723	ENSMUSG00000010205(87,ortholog_one2one)			ENSG00000162437(37,within_species_paralog)
U2AF2_HUMAN	U2AF2	3	400-459, 151-224, 261-330	11 18 20	PF00076	0000398 0006366 0006369 0006397 0006406 0008380 0010467 0031124 0048025 0005634 0005654 0005681 0000166 0003676 0003723 0005515 0019899 0070742	ENSMUSG00000030435(100,ortholog_one2one)	FBgn0005411(62,ortholog_one2one)	Y92C3B.2(55,ortholog_one2many)	ENSG00000152332(19,within_species_paralog)
RBM4B_HUMAN	RBM4B	2	4-64, 81-141	44	PF00076 PF00098	0006397 0008380 0032922 0043153 0005634 0005730 0000166 0003676 0003723 0008270 0046872	ENSMUSG00000033760(96,ortholog_one2one)	FBgn0011640(31,ortholog_one2many)	ZK863.7(16,ortholog_one2many)	ENSG00000173933(91,within_species_paralog); ENSG00000248643(91,within_species_paralog); ENSG00000239306(27,within_species_paralog)
RBM23_HUMAN	RBM23	2	168-233, 265-334	19	PF00076	0006397 0005634 0000166 0003676 0003723		FBgn0031883(25,ortholog_one2many)	Y55F3AM.3(39,ortholog_one2many)	ENSG00000131051(60,within_species_paralog); ENSG00000116001(13,within_species_paralog); ENSG00000151923(13,within_species_paralog)
DAZ3_HUMAN	DAZ2	1	42-98	NULL	PF00076	0003676	ENSMUSG00000010592(29,ortholog_one2many)		F56D1.7(10,ortholog_one2many)	ENSG00000205916(70,within_species_paralog); ENSG00000188120(70,within_species_paralog); ENSG00000187191(73,within_species_paralog); ENSG00000092345(32,within_species_paralog); ENSG00000152430(13,within_species_paralog)
CPEB2_HUMAN	CPEB2	1	334-395	NULL	PF00076	0003676	ENSMUSG00000039782(86,ortholog_one2one)	FBgn0262573(27,ortholog_one2many)	C40H1.1(14,ortholog_one2many)	ENSG00000107864(35,within_species_paralog); ENSG00000113742(35,within_species_paralog); ENSG00000214575(14,within_species_paralog)
RBM11_HUMAN	RBM11	1	12-80	NULL	PF00076	0000166 0003676 0003723	ENSMUSG00000032940(67,ortholog_one2one)	FBgn0031224(17,ortholog_one2many)	Y37D8A.21(17,ortholog_one2many)	ENSG00000076053(27,within_species_paralog)
RBY1D_HUMAN	RBMY1D	1	10-79	NULL	PF08081 PF00076	0006397 0008380 0005634 0000166 0003676 0003723	ENSMUSG00000071960(30,ortholog_many2many); ENSMUSG00000069031(30,ortholog_many2many); ENSMUSG00000090652(30,ortholog_many2many); ENSMUSG00000052831(30,ortholog_many2many); ENSMUSG00000091987(31,ortholog_many2many)	FBgn0003742(8,ortholog_one2many)	C18D11.4(9,ortholog_one2many)	ENSG00000242389(100,within_species_paralog); ENSG00000242875(100,within_species_paralog); ENSG00000234414(100,within_species_paralog); ENSG00000226941(99,within_species_paralog); ENSG00000169800(99,within_species_paralog); ENSG00000147274(46,within_species_paralog); ENSG00000213516(44,within_species_paralog); ENSG00000170748(37,within_species_paralog); ENSG00000175718(30,within_species_paralog); …
RBM47_HUMAN	RBM47	3	73-137, 153-214, 248-311	29 17 19	PF00076	0005634 0000166 0003676 0003723	ENSMUSG00000070780(94,ortholog_one2one)	FBgn0038826(30,ortholog_one2many)	F58D5.1(28,ortholog_one2many)	ENSG00000148584(46,within_species_paralog); ENSG00000151962(42,within_species_paralog); ENSG00000125944(33,within_species_paralog); ENSG00000135316(32,within_species_paralog); ENSG00000256453(17,within_species_paralog)
RBM18_HUMAN	RBM18	1	27-98	NULL	PF00076	0000166 0003676 0003723	ENSMUSG00000026889(99,ortholog_one2one)	FBgn0030571(35,ortholog_one2one)
FUS_HUMAN	FUS	1	287-365	NULL	PF00641 PF00076	0000398 0008219 0008380 0010467 0005622 0005634 0005654 0005737 0000166 0003676 0003677 0003723 0005515 0008270 0046872	ENSMUSG00000030795(95,ortholog_one2one)	FBgn0011571(25,ortholog_many2many); FBgn0037939(16,ortholog_many2many)	C27H5.3(19,ortholog_many2many); F10E7.2(6,ortholog_many2many)	ENSG00000172660(48,within_species_paralog); ENSG00000182944(45,within_species_paralog); ENSG00000109534(9,within_species_paralog)
MK67I_HUMAN	MKI67IP	1	47-116	NULL	PF12196 PF00076	0006461 0009303 0016072 0000794 0005634 0005654 0005694 0005730 0005737 0000166 0003676 0003723 0005515	ENSMUSG00000026377(60,ortholog_one2one)	FBgn0038989(26,ortholog_one2one)	T04A8.6(24,ortholog_one2one)
IF2B1_HUMAN	IGF2BP1	2	85-150, 4-68	3	PF00013 PF00076	0006403 0010610 0017148 0042035 0070934 0005634 0005737 0005829 0005886 0010494 0030027 0030529 0043197 0043231 0070937 0030425 0000166 0003676 0003723 0003729 0003730 0005515 0045182 0048027	ENSMUSG00000013415(99,ortholog_one2one)	FBgn0262735(32,ortholog_one2many)	M88.5(25,ortholog_one2many)	ENSG00000073792(68,within_species_paralog); ENSG00000136231(73,within_species_paralog)
RBY1A_HUMAN	RBMY1A1	1	10-79	NULL	PF08081 PF00076	0000381 0006396 0006397 0007283 0008380 0005634 0000166 0003676 0003723 0003729 0005515	ENSMUSG00000071960(30,ortholog_many2many); ENSMUSG00000069031(30,ortholog_many2many); ENSMUSG00000090652(30,ortholog_many2many); ENSMUSG00000052831(30,ortholog_many2many); ENSMUSG00000091987(31,ortholog_many2many)	FBgn0003742(8,ortholog_one2many)	C18D11.4(9,ortholog_one2many)	ENSG00000244395(100,within_species_paralog); ENSG00000242389(100,within_species_paralog); ENSG00000242875(100,within_species_paralog); ENSG00000226941(99,within_species_paralog); ENSG00000169800(99,within_species_paralog); ENSG00000147274(46,within_species_paralog); ENSG00000213516(44,within_species_paralog); ENSG00000170748(37,within_species_paralog); ENSG00000175718(29,within_species_paralog); …
IF4H_HUMAN	EIF4H	1	45-112	NULL	PF00076	0006412 0006413 0006446 0010467 0044267 0044419 0005737 0005829 0016281 0048471 0000166 0003676 0003723 0003743 0005515 0008135	ENSMUSG00000040731(99,ortholog_one2one)	FBgn0262734(34,ortholog_one2many); FBgn0039797(28,ortholog_one2many)		ENSG00000063046(31,within_species_paralog)
HNRH1_HUMAN	HNRNPH1	3	15-82, 293-355, 115-181	31 44 41	PF00076 PF08080	0000398 0006396 0008380 0010467 0043484 0005634 0005654 0005737 0015629 0030530 0071013 0000166 0003676 0003723 0005515 0008266	ENSMUSG00000007850(97,apparent_ortholog_one2one)			ENSG00000126945(96,within_species_paralog); ENSG00000169813(70,within_species_paralog); ENSG00000096746(49,within_species_paralog); ENSG00000132463(34,within_species_paralog); ENSG00000244462(15,other_paralog); ENSG00000104413(23,other_paralog); ENSG00000183808(16,other_paralog); ENSG00000103067(21,other_paralog)
RBMS3_HUMAN	RBMS3	2	63-123, 142-206	27	PF00076	0005737 0000166 0003676 0003723	ENSMUSG00000039607(94,ortholog_one2one)	FBgn0052423(37,ortholog_one2many)	R10E4.2(32,ortholog_one2many)	ENSG00000076067(62,within_species_paralog); ENSG00000153250(67,within_species_paralog); ENSG00000179950(10,within_species_paralog); ENSG00000196361(18,other_paralog); ENSG00000184388(5,other_paralog); ENSG00000107105(18,other_paralog); ENSG00000090621(13,other_paralog); ENSG00000101104(13,other_paralog); ENSG00000186288(5,other_paralog); ENSG00000066044(16,other_paralog); ENSG00000070756(13,other…
RBMXL_HUMAN	RBMXL1	1	10-80	NULL	PF00076 PF08081	0006376 0006397 0008380 0045893 0005634 0005681 0000166 0003676 0003727		FBgn0003742(10,ortholog_one2many)	C18D11.4(14,ortholog_one2many)	ENSG00000147274(95,within_species_paralog); ENSG00000244395(56,within_species_paralog); ENSG00000242389(56,within_species_paralog); ENSG00000242875(57,within_species_paralog); ENSG00000234414(56,within_species_paralog); ENSG00000226941(57,within_species_paralog); ENSG00000169800(57,within_species_paralog); ENSG00000170748(69,within_species_paralog); ENSG00000175718(53,within_species_paralog); ENS…
PTBP2_HUMAN	PTBP2	3	459-518, 183-247, 340-405	26 21 24	PF00076	0006376 0006397 0008380 0005634 0005681 0000166 0003676 0003723 0003729 0005515	ENSMUSG00000028134(100,ortholog_one2one)	FBgn0011224(54,ortholog_one2many)	D2089.4(47,ortholog_one2many)	ENSG00000011304(74,within_species_paralog); ENSG00000119314(69,within_species_paralog); ENSG00000104824(24,within_species_paralog); ENSG00000143889(23,within_species_paralog)
PRGC1_HUMAN	PPARGC1A	1	679-739	NULL	PF00076	0001659 0001678 0006094 0006367 0006397 0006461 0007005 0007586 0008380 0010941 0014850 0019395 0022904 0030521 0034599 0035066 0042594 0043524 0045333 0045722 0045893 0045944 0046321 0050821 0050873 0051091 0070997 0005634 0005665 0005829 0000166 0001104 0003676 0003677 0003713 0003723 0005515 0008134 0016922 0030374 0050681	ENSMUSG00000029167(95,ortholog_one2one)	FBgn0037248(16,ortholog_one2many)		ENSG00000155846(25,within_species_paralog); ENSG00000148840(25,within_species_paralog)
PABP5_HUMAN	PABPC5	4	20-88, 108-175, 304-372, 201-269	23 23 24 36 32 39	PF00076	0005737 0000166 0003676 0003723	ENSMUSG00000034732(95,ortholog_one2one)	FBgn0261619(55,ortholog_one2many)	Y106G6H.2(51,ortholog_many2many); F18H3.3(51,ortholog_many2many)	ENSG00000090621(64,within_species_paralog); ENSG00000070756(63,within_species_paralog); ENSG00000184388(32,within_species_paralog); ENSG00000186288(32,within_species_paralog); ENSG00000151846(60,within_species_paralog); ENSG00000101104(57,within_species_paralog); ENSG00000196361(15,other_paralog); ENSG00000153250(14,other_paralog); ENSG00000107105(15,other_paralog); ENSG00000066044(15,other_paral…
SART3_HUMAN	SART3	2	706-774, 803-871	27	PF00076 PF05391	0006396 0005622 0005634 0005737 0016607 0000166 0003676 0003723 0005515	ENSMUSG00000018974(87,ortholog_one2one)	FBgn0014024(16,ortholog_one2many); FBgn0034075(6,ortholog_one2many)	B0035.12(23,ortholog_one2one)	ENSG00000115053(12,within_species_paralog)
RBM14_HUMAN	RBM14	2	81-142, 3-60	50	PF00076	0006260 0006281 0006310 0006355 0009725 0016575 0030520 0042921 0045944 0005634 0005667 0016592 0030529 0000166 0001104 0003676 0003723 0005515 0030374 0030674	ENSMUSG00000006456(98,ortholog_one2one)	FBgn0011640(13,ortholog_one2many)	ZK863.7(9,ortholog_one2many)	ENSG00000173914(14,within_species_paralog); ENSG00000173933(15,within_species_paralog); ENSG00000248643(15,within_species_paralog)
REXON_HUMAN	AC004381.6	1	510-571	NULL	PF00929 PF00076	0005622 0005730 0000166 0003676 0003723 0004527 0016787	ENSMUSG00000030924(38,ortholog_one2one)	FBgn0035707(17,ortholog_one2one)	C05C8.5(16,ortholog_one2one)	ENSG00000079313(12,within_species_paralog); ENSG00000205176(12,within_species_paralog); ENSG00000223524(12,within_species_paralog); ENSG00000255940(12,within_species_paralog)
SR140_HUMAN	U2SURP	1	276-348	NULL	PF01805 PF00076	0006396 0005634 0000166 0003676 0003723 0005515	ENSMUSG00000032407(99,ortholog_one2one)	FBgn0034572(42,ortholog_one2one)	C07H6.4(31,ortholog_one2one)
RBM5_HUMAN	RBM5	1	100-163	NULL	PF01585 PF00076 PF00641	0000245 0000381 0000398 0006396 0008285 0008380 0010467 0043065 0005622 0005634 0005654 0005681 0000166 0003676 0003677 0003723 0003729 0005515 0008270 0046872	ENSMUSG00000032580(98,ortholog_one2one)	FBgn0031318(30,ortholog_one2many)	T08B2.5(23,ortholog_one2many)	ENSG00000182872(55,within_species_paralog); ENSG00000004534(28,within_species_paralog)
HNRPR_HUMAN	HNRNPR	3	167-231, 343-404, 248-309	25 22 22	PF00076	0000398 0006397 0008380 0010467 0005634 0005654 0005737 0030529 0030530 0071013 0000166 0003676 0003723 0005515	ENSMUSG00000066037(99,ortholog_one2one)	FBgn0038826(47,ortholog_one2many)	F58D5.1(35,ortholog_one2many)	ENSG00000135316(80,within_species_paralog); ENSG00000148584(29,within_species_paralog); ENSG00000151962(28,within_species_paralog); ENSG00000163694(31,within_species_paralog); ENSG00000256453(13,within_species_paralog)
SRS12_HUMAN	SRSF12	1	12-81	NULL	PF00076	0000244 0000381 0000395 0006397 0008380 0016482 0048025 0005634 0005654 0000166 0003676 0003723 0050733 0051082	ENSMUSG00000054679(60,ortholog_one2one)			ENSG00000215699(53,within_species_paralog); ENSG00000188529(53,within_species_paralog); ENSG00000161547(27,within_species_paralog); ENSG00000115875(23,within_species_paralog); ENSG00000112081(21,within_species_paralog); ENSG00000124193(19,other_paralog); ENSG00000100650(18,other_paralog); ENSG00000111786(10,other_paralog); ENSG00000116350(23,other_paralog); ENSG00000136450(12,other_paralog)
ENOX1_HUMAN	ENOX1	1	144-199	NULL	PF00076	0006810 0022900 0048511 0005576 0005615 0005886 0000166 0003676 0016491	ENSMUSG00000022012(98,ortholog_one2one)	FBgn0036317(36,ortholog_one2many)		ENSG00000165675(63,within_species_paralog)
SREK1_HUMAN	SREK1	1	68-136	NULL	PF00076	0006397 0008380 0005634 0005681 0000166 0003676	ENSMUSG00000032621(88,apparent_ortholog_one2one)	FBgn0024285(22,ortholog_one2many)	C04G2.8(6,ortholog_many2many); T27A3.4(6,ortholog_many2many); C10G11.9(6,ortholog_many2many)	ENSG00000116754(38,within_species_paralog); ENSG00000124380(6,within_species_paralog); ENSG00000111011(9,within_species_paralog); ENSG00000146963(7,within_species_paralog); ENSG00000007392(7,within_species_paralog); ENSG00000108848(8,within_species_paralog); ENSG00000174891(8,other_paralog); ENSG00000132424(12,other_paralog); ENSG00000134186(7,other_paralog); ENSG00000119707(7,other_paralog)
RB12B_HUMAN	RBM12B	2	402-470, 288-353	12	PF00076	0000166 0003676 0003723	ENSMUSG00000052137(63,ortholog_one2many); ENSMUSG00000046667(63,ortholog_one2many)	FBgn0035235(16,ortholog_one2many)	Y106G6D.7(15,ortholog_one2many)	ENSG00000244462(25,within_species_paralog); ENSG00000104413(7,within_species_paralog); ENSG00000103067(7,within_species_paralog); ENSG00000096746(4,other_paralog); ENSG00000132463(6,other_paralog); ENSG00000169813(7,other_paralog); ENSG00000126945(7,other_paralog); ENSG00000169045(7,other_paralog)
EPAB2_HUMAN	PABPN1L	1	149-218	NULL	PF00076	0005737 0000166 0003676 0003723	ENSMUSG00000069867(65,ortholog_one2one)	FBgn0005648(32,ortholog_one2many)	C17E4.5(31,ortholog_one2many)	ENSG00000100836(39,within_species_paralog); ENSG00000258643(39,within_species_paralog)
SLIRP_HUMAN	SLIRP	1	22-84	NULL	PF00076	0003676	ENSMUSG00000021040(70,ortholog_one2one)	FBgn0064117(27,ortholog_one2many); FBgn0037602(24,ortholog_one2many)	C50B8.1(28,ortholog_one2one)
EIF3G_HUMAN	EIF3G	1	241-303	NULL	PF12353 PF00076	0006412 0006413 0010467 0044267 0005634 0005737 0005829 0005852 0048471 0000166 0003676 0003723 0003743 0005515	ENSMUSG00000070319(98,ortholog_one2one)	FBgn0038796(41,ortholog_one2many); FBgn0029629(41,ortholog_one2many)	F22B5.2(32,ortholog_one2one)
RBM45_HUMAN	RBM45	3	34-92, 406-457, 127-183	26 35 13	PF00076	0007275 0007399 0030154 0005634 0005737 0000166 0003676 0003723	ENSMUSG00000042369(91,ortholog_one2one)	FBgn0035526(36,ortholog_one2one)
TDR10_HUMAN	TDRD10	1	36-100	NULL	PF00567 PF00076	0000166 0003676 0003723
RFOX1_HUMAN	RBFOX1	1	120-187	NULL	PF12414 PF00076	0003676	ENSMUSG00000008658(98,ortholog_one2one)		ZC404.8(20,ortholog_one2many)	ENSG00000100320(60,within_species_paralog); ENSG00000167281(56,within_species_paralog)
RBM34_HUMAN	RBM34	1	289-358	NULL	PF00076	0005634 0005730 0000166 0003676 0003723	ENSMUSG00000033931(70,ortholog_one2one)	FBgn0032620(26,ortholog_one2one)	F11A10.7(26,ortholog_one2one)
DAZ2_HUMAN	DAZ2	1	42-98	NULL	PF00076	0007275 0007283 0007338 0030154 0005634 0005737 0000166 0003676 0003723	ENSMUSG00000010592(29,ortholog_one2many)		F56D1.7(10,ortholog_one2many)	ENSG00000205916(70,within_species_paralog); ENSG00000188120(70,within_species_paralog); ENSG00000187191(73,within_species_paralog); ENSG00000092345(32,within_species_paralog); ENSG00000152430(13,within_species_paralog)
ROA1_HUMAN	HNRNPA1	2	107-175, 16-84	33	PF00076	0000398 0006397 0006405 0006810 0008380 0010467 0044419 0051028 0051168 0051170 0000380 0005634 0005654 0005681 0005730 0005737 0030529 0030530 0071013 0000166 0003676 0003697 0003723 0003727	ENSMUSG00000046434(100,ortholog_one2one)			ENSG00000139675(83,within_species_paralog); ENSG00000122566(56,other_paralog); ENSG00000152795(19,other_paralog); ENSG00000177733(35,other_paralog); ENSG00000153944(17,other_paralog); ENSG00000071626(18,other_paralog); ENSG00000135097(20,other_paralog); ENSG00000197451(20,other_paralog); ENSG00000138668(20,other_paralog); ENSG00000170144(55,other_paralog)
PPRC1_HUMAN	PPRC1	1	1545-1604	NULL	PF00076	0006355 0005634 0000166 0003676 0003723	ENSMUSG00000055491(75,ortholog_one2one)	FBgn0037248(10,ortholog_one2many)		ENSG00000109819(12,within_species_paralog); ENSG00000155846(11,within_species_paralog)
PABP1_HUMAN	PABPC1	4	101-168, 296-363, 193-261, 13-83	41 47 33 51 36 31	PF00076 PF00658	0000288 0000289 0000398 0006378 0006412 0008380 0010467 0016070 0016071 0044267 0045727 0048255 2000623 0005634 0005737 0005829 0030529 0071013 0000166 0003676 0003723 0005515 0008022 0008143 0008494		FBgn0261619(58,ortholog_one2many)	Y106G6H.2(54,ortholog_many2many); F18H3.3(53,ortholog_many2many)	ENSG00000151846(92,within_species_paralog); ENSG00000090621(78,within_species_paralog); ENSG00000184388(25,within_species_paralog); ENSG00000186288(25,within_species_paralog); ENSG00000101104(67,within_species_paralog); ENSG00000174740(38,within_species_paralog); ENSG00000196361(10,other_paralog); ENSG00000153250(10,other_paralog); ENSG00000107105(10,other_paralog); ENSG00000066044(11,other_paral…
CELF4_HUMAN	CELF4	2	154-216, 56-123	41	PF00076	0000381 0006376 0007281 0009790 0048026 0005634 0005737 0000166 0000900 0003676 0003729 0042835	ENSMUSG00000024268(99,ortholog_one2one)		C17D12.2(48,ortholog_one2many)	ENSG00000159409(64,within_species_paralog); ENSG00000161082(63,within_species_paralog); ENSG00000140488(64,within_species_paralog); ENSG00000048740(42,within_species_paralog); ENSG00000149187(41,within_species_paralog)
SET1A_HUMAN	SETD1A	1	101-165	NULL	PF11764 PF00856 PF00076	0006355 0016568 0051568 0005634 0005694 0016607 0035097 0048188 0000166 0003676 0003723 0005515 0008168 0016740 0018024 0042800	ENSMUSG00000042308(90,ortholog_one2one)	FBgn0040022(20,ortholog_one2many)	C26E6.9(18,ortholog_one2many)	ENSG00000139718(37,within_species_paralog); ENSG00000118058(13,within_species_paralog); ENSG00000105663(13,within_species_paralog); ENSG00000106462(6,within_species_paralog); ENSG00000108799(5,within_species_paralog); ENSG00000055609(10,other_paralog); ENSG00000167548(9,other_paralog)
DAZP1_HUMAN	DAZAP1	2	115-183, 12-80	31	PF00076	0007275 0007283 0030154 0005634 0005737 0000166 0003676 0003723	ENSMUSG00000069565(98,ortholog_one2one)	FBgn0004838(27,ortholog_one2one)		ENSG00000135097(22,within_species_paralog); ENSG00000153944(20,within_species_paralog); ENSG00000177733(16,within_species_paralog); ENSG00000138668(18,within_species_paralog); ENSG00000152795(19,within_species_paralog); ENSG00000197451(20,within_species_paralog); ENSG00000122566(17,other_paralog); ENSG00000139675(16,other_paralog); ENSG00000135486(17,other_paralog); ENSG00000170144(17,other_paral…
TSAP1_HUMAN	TRNAU1AP	2	5-73, 98-161	28	PF00076	0001514 0006412 0005634 0005737 0000166 0003676 0003723 0005515	ENSMUSG00000028898(99,ortholog_one2one)	FBgn0031607(41,ortholog_one2many)	T07F10.3(25,ortholog_one2many)	ENSG00000137434(16,within_species_paralog)
RBP56_HUMAN	TAF15	1	236-314	NULL	PF00076 PF00641	0045893 0005622 0005634 0005737 0000166 0003676 0003677 0003723 0005515 0008270 0046872	ENSMUSG00000020680(89,ortholog_one2one)	FBgn0011571(18,ortholog_many2many); FBgn0037939(13,ortholog_many2many)	C27H5.3(13,ortholog_many2many); F10E7.2(4,ortholog_many2many)	ENSG00000089280(42,within_species_paralog); ENSG00000182944(34,within_species_paralog); ENSG00000109534(7,within_species_paralog)
CELF5_HUMAN	CELF5	3	136-198, 402-471, 47-113	31 42 25	PF00076	0006397 0005634 0005737 0000166 0003676 0003723	ENSMUSG00000034818(73,ortholog_one2one)		C17D12.2(48,ortholog_one2many)	ENSG00000101489(63,within_species_paralog); ENSG00000159409(62,within_species_paralog); ENSG00000140488(61,within_species_paralog); ENSG00000048740(44,within_species_paralog); ENSG00000149187(43,within_species_paralog)
PAP1L_HUMAN	PABPC1L	4	101-168, 193-261, 296-363, 13-83	50 41 29 48 33 29	PF00076 PF00658	0000166 0003676 0003723	ENSMUSG00000054582(76,ortholog_one2one)	FBgn0261619(55,ortholog_one2many)	Y106G6H.2(51,ortholog_many2many); F18H3.3(49,ortholog_many2many)	ENSG00000070756(70,within_species_paralog); ENSG00000151846(66,within_species_paralog); ENSG00000090621(67,within_species_paralog); ENSG00000184388(24,within_species_paralog); ENSG00000186288(24,within_species_paralog); ENSG00000174740(36,within_species_paralog); ENSG00000196361(11,other_paralog); ENSG00000153250(10,other_paralog); ENSG00000107105(11,other_paralog); ENSG00000066044(11,other_paral…
CPSF7_HUMAN	CPSF7	1	84-155	NULL	PF00076	0000398 0006366 0006369 0006397 0008380 0010467 0031124 0051262 0005634 0005654 0005849 0000166 0003676 0003723 0005515	ENSMUSG00000034820(90,ortholog_one2one)	FBgn0035872(36,ortholog_one2many)	D1046.1(26,ortholog_one2many)	ENSG00000111605(47,within_species_paralog); ENSG00000143368(9,within_species_paralog); ENSG00000168175(6,within_species_paralog); ENSG00000104897(8,within_species_paralog)
CPEB4_HUMAN	CPEB4	1	474-535	NULL	PF00076	0000166 0003676 0003723	ENSMUSG00000020300(96,ortholog_one2one)	FBgn0262573(37,ortholog_one2many)	C40H1.1(22,ortholog_one2many)	ENSG00000107864(54,within_species_paralog); ENSG00000137449(50,within_species_paralog); ENSG00000214575(19,within_species_paralog)
RBY1B_HUMAN	RBMY1B	1	10-79	NULL	PF08081 PF00076	0006397 0007283 0008380 0008584 0005634 0000166 0003676 0003723 0005515	ENSMUSG00000071960(31,ortholog_many2many); ENSMUSG00000069031(31,ortholog_many2many); ENSMUSG00000090652(30,ortholog_many2many); ENSMUSG00000052831(30,ortholog_many2many); ENSMUSG00000091987(31,ortholog_many2many)	FBgn0003742(8,ortholog_one2many)	C18D11.4(9,ortholog_one2many)	ENSG00000244395(100,within_species_paralog); ENSG00000242389(100,within_species_paralog); ENSG00000234414(100,within_species_paralog); ENSG00000226941(99,within_species_paralog); ENSG00000169800(99,within_species_paralog); ENSG00000147274(47,within_species_paralog); ENSG00000213516(45,within_species_paralog); ENSG00000170748(37,within_species_paralog); ENSG00000175718(30,within_species_paralog); …
IF2B3_HUMAN	IGF2BP3	2	85-150, 4-68	9	PF00013 PF00076	0006412 0009653 0017148 0042035 0005634 0005737 0005829 0000166 0003676 0003723 0003730 0005515 0045182 0048027	ENSMUSG00000029814(97,ortholog_one2one)	FBgn0262735(32,ortholog_one2many)	M88.5(25,ortholog_one2many)	ENSG00000159217(73,within_species_paralog); ENSG00000073792(65,within_species_paralog)
HNRDL_HUMAN	HNRPDL	2	151-218, 235-296	40	PF00076	0006355 0006396 0005634 0005737 0030530 0000166 0003676 0003677 0003690 0003697 0003723 0008143	ENSMUSG00000029328(97,ortholog_one2one)	FBgn0086897(21,ortholog_one2many)		ENSG00000138668(48,within_species_paralog); ENSG00000197451(43,within_species_paralog); ENSG00000135097(21,within_species_paralog); ENSG00000153944(19,within_species_paralog); ENSG00000177733(15,within_species_paralog); ENSG00000071626(19,within_species_paralog); ENSG00000122566(16,other_paralog); ENSG00000139675(16,other_paralog); ENSG00000135486(16,other_paralog); ENSG00000170144(16,other_paral…
U1SBP_HUMAN	SNRNP35	1	53-122	NULL	PF00076	0006397 0008380 0005634 0005689 0000166 0003676 0003723	ENSMUSG00000029402(87,ortholog_one2many); ENSMUSG00000031998(29,ortholog_one2many)		K04G7.10(29,ortholog_one2many)	ENSG00000104852(38,within_species_paralog)
G3BP2_HUMAN	G3BP2	1	333-390	NULL	PF02136 PF00076	0006810 0007253 0007264 0007265 0051028 0051056 0005622 0005737 0005829 0000166 0003676 0003723 0030159	ENSMUSG00000029405(98,ortholog_one2one)	FBgn0015778(39,ortholog_one2many)	K08F4.2(18,ortholog_one2many)	ENSG00000145907(63,within_species_paralog)
LARP7_HUMAN	LARP7	1	127-188	NULL	PF08777 PF05383 PF00076	0006396 0005634 0005654 0030529 0000166 0003676 0003723	ENSMUSG00000066107(33,ortholog_one2many); ENSMUSG00000027968(80,ortholog_one2many)	FBgn0260771(23,ortholog_one2one)	C44E4.4(12,ortholog_one2many)	ENSG00000138385(16,within_species_paralog)
HNRPC_HUMAN	HNRNPC	1	18-80	NULL	PF00076	0003676 0000398 0008380 0010467 0005634 0005654 0005681 0071013 0000166 0003723 0005515 0042802		FBgn0259935(15,ortholog_one2many)		ENSG00000179172(87,within_species_paralog); ENSG00000125970(41,within_species_paralog); ENSG00000184672(46,within_species_paralog)
SRS11_HUMAN	SRSF11	1	37-101	NULL	PF00076	0000398 0006366 0006369 0006397 0006406 0008380 0010467 0031124 0005634 0005654 0000166 0003676 0003723	ENSMUSG00000055436(95,ortholog_one2one)	FBgn0024285(27,ortholog_one2many)	C04G2.8(8,ortholog_many2many); T27A3.4(7,ortholog_many2many); C10G11.9(7,ortholog_many2many)	ENSG00000153914(49,within_species_paralog); ENSG00000124380(8,within_species_paralog); ENSG00000111011(13,within_species_paralog); ENSG00000146963(9,within_species_paralog); ENSG00000007392(9,within_species_paralog); ENSG00000108848(11,within_species_paralog); ENSG00000174891(10,other_paralog); ENSG00000132424(14,other_paralog); ENSG00000134186(8,other_paralog); ENSG00000119707(9,other_paralog)
CELF1_HUMAN	CELF1	3	403-472, 19-84, 110-175	22 25 34	PF00076	0006376 0006397 0007281 0007286 0009790 0016246 0040018 0043484 0005625 0005634 0005737 0030529 0000166 0000900 0003676 0003723 0003729 0005515 0031369 0042835	ENSMUSG00000005506(94,ortholog_one2one)	FBgn0000114(43,ortholog_one2many)	T01D1.2(42,ortholog_one2many)	ENSG00000048740(76,within_species_paralog); ENSG00000159409(40,within_species_paralog); ENSG00000101489(39,within_species_paralog); ENSG00000140488(40,within_species_paralog); ENSG00000161082(41,within_species_paralog)
PSPC1_HUMAN	PSPC1	2	84-148, 158-216	22	PF00076 PF08075	0006355 0005634 0005654 0005730 0005737 0016363 0042382 0000166 0003676 0003723 0005515	ENSMUSG00000021938(98,ortholog_one2one)	FBgn0004227(30,ortholog_many2many); FBgn0015520(27,ortholog_many2many)	F25B5.7(30,ortholog_one2many)	ENSG00000147140(54,within_species_paralog); ENSG00000116560(52,within_species_paralog)
HTSF1_HUMAN	HTATSF1	2	289-343, 135-212	5	PF00076	0006357 0019079 0032784 0005634 0000166 0003676 0003723	ENSMUSG00000067873(76,ortholog_one2one)	FBgn0037081(23,ortholog_one2one)	Y65B4A.1(18,ortholog_one2one)
MYEF2_HUMAN	MYEF2	3	235-303, 525-592, 102-171	45 28 39	PF00076	0006351 0014902 0030182 0005634 0005794 0000166 0003676 0003677 0003723	ENSMUSG00000027201(90,ortholog_one2many); ENSMUSG00000049230(73,ortholog_one2many)	FBgn0260010(30,ortholog_one2many)	C25A1.4(23,ortholog_one2many)	ENSG00000099783(51,within_species_paralog)
SRSF1_HUMAN	SRSF1	2	18-85, 123-184	25	PF00076	0000395 0000398 0001701 0006366 0006369 0006376 0006397 0006406 0008380 0010467 0031124 0060048 0005634 0005654 0005737 0016607 0071013 0000166 0003676 0003723 0005515 0050733	ENSMUSG00000018379(100,ortholog_one2one)	FBgn0040284(64,ortholog_one2many)	Y111B2A.18(58,ortholog_one2many)	ENSG00000111786(60,within_species_paralog); ENSG00000116350(39,within_species_paralog); ENSG00000100650(34,within_species_paralog); ENSG00000124193(38,within_species_paralog); ENSG00000112081(17,other_paralog); ENSG00000215699(13,other_paralog); ENSG00000161547(18,other_paralog); ENSG00000188529(13,other_paralog); ENSG00000115875(22,other_paralog); ENSG00000154548(12,other_paralog)
HNRPQ_HUMAN	SYNCRIP	3	164-229, 245-306, 340-401	20 22 19	PF00076	0000398 0006396 0008380 0044419 0070934 0005634 0005654 0005737 0005783 0005792 0030529 0070937 0071013 0071204 0000166 0003676 0003723 0005515 0008143	ENSMUSG00000032423(89,ortholog_one2one)	FBgn0038826(48,ortholog_one2many)	F58D5.1(35,ortholog_one2many)	ENSG00000125944(81,within_species_paralog); ENSG00000148584(30,within_species_paralog); ENSG00000151962(28,within_species_paralog); ENSG00000163694(31,within_species_paralog); ENSG00000256453(12,within_species_paralog)
RBMS2_HUMAN	RBMS2	2	137-201, 58-118	29	PF00076	0006396 0005634 0000166 0003676 0003723	ENSMUSG00000040043(84,apparent_ortholog_one2one)	FBgn0052423(41,ortholog_one2many)	R10E4.2(33,ortholog_one2many)	ENSG00000144642(67,within_species_paralog); ENSG00000153250(68,within_species_paralog); ENSG00000179950(12,within_species_paralog); ENSG00000196361(18,other_paralog); ENSG00000184388(6,other_paralog); ENSG00000107105(19,other_paralog); ENSG00000090621(14,other_paralog); ENSG00000101104(14,other_paralog); ENSG00000186288(6,other_paralog); ENSG00000066044(17,other_paralog); ENSG00000070756(14,other…
RBM38_HUMAN	RBM38	1	36-93	NULL	PF00076	0006397 0006977 0006978 0007049 0007050 0008285 0010830 0030154 0043484 0070935 0005634 0005737 0005829 0000166 0003676 0003729 0003730	ENSMUSG00000027510(95,ortholog_one2one)		T22B2.4(43,ortholog_one2many)	ENSG00000112183(66,within_species_paralog)
CNOT4_HUMAN	CNOT4	1	130-187	NULL	PF00076	0000288 0000289 0006355 0016070 0016071 0051865 0005634 0005737 0005829 0000166 0003676 0003723 0004842 0005515 0008270 0016874 0046872	ENSMUSG00000038784(98,ortholog_one2one)	FBgn0051716(38,ortholog_one2one)	C49H3.5(35,ortholog_one2one)
PPIE_HUMAN	PPIE	1	8-78	NULL	PF00160 PF00076	0000398 0000413 0006355 0006457 0008380 0005634 0071013 0000166 0003676 0003723 0003755 0005515 0016018 0016853	ENSMUSG00000028651(88,apparent_ortholog_one2one)	FBgn0039347(16,ortholog_one2one)	Y75B12B.2(33,ortholog_many2many); Y75B12B.5(32,ortholog_many2many); Y49A3A.5(33,ortholog_many2many); ZK520.5(32,ortholog_many2many)	ENSG00000196262(32,within_species_paralog); ENSG00000198161(30,within_species_paralog); ENSG00000255854(30,within_species_paralog); ENSG00000255963(30,within_species_paralog); ENSG00000236334(30,within_species_paralog); ENSG00000256374(30,within_species_paralog); ENSG00000108179(34,within_species_paralog)
RBM25_HUMAN	RBM25	1	89-157	NULL	PF01480 PF00076	0000381 0006397 0006915 0008380 0005634 0005737 0016607 0000166 0003676 0003729 0005515	ENSMUSG00000010608(99,ortholog_one2one)	FBgn0028474(39,ortholog_one2one)	Y57A10A.19(7,ortholog_one2many)	ENSG00000134186(9,within_species_paralog); ENSG00000174891(4,within_species_paralog); ENSG00000132424(7,within_species_paralog); ENSG00000116754(5,other_paralog); ENSG00000007392(4,other_paralog); ENSG00000124380(3,other_paralog); ENSG00000153914(5,other_paralog); ENSG00000146963(4,other_paralog); ENSG00000111011(5,other_paralog); ENSG00000108848(4,other_paralog)
RDM1_HUMAN	RDM1	1	32-88	NULL	PF00076 PF04098	0006281 0006310 0005634 0005730 0005737 0015030 0016605 0000166 0003676 0003677 0003723	ENSMUSG00000010362(71,ortholog_one2one)
RBMS1_HUMAN	RBMS1	2	64-124, 143-207	27	PF00076	0006260 0006396 0005634 0000166 0003676 0003677 0003690 0003697 0003723 0005515	ENSMUSG00000026970(96,ortholog_one2one)	FBgn0052423(38,ortholog_one2many)	R10E4.2(33,ortholog_one2many)	ENSG00000144642(72,within_species_paralog); ENSG00000076067(68,within_species_paralog); ENSG00000179950(12,within_species_paralog); ENSG00000196361(19,other_paralog); ENSG00000184388(5,other_paralog); ENSG00000107105(19,other_paralog); ENSG00000090621(15,other_paralog); ENSG00000101104(16,other_paralog); ENSG00000186288(5,other_paralog); ENSG00000066044(17,other_paralog); ENSG00000070756(15,other…
CELF2_HUMAN	CELF2	3	134-198, 425-494, 43-111	30 33 21	PF00076	0006396 0006397 0008016 0005634 0005737 0000166 0003676 0003723	ENSMUSG00000002107(94,ortholog_one2one)	FBgn0000114(43,ortholog_one2many)	T01D1.2(40,ortholog_one2many)	ENSG00000149187(74,within_species_paralog); ENSG00000159409(41,within_species_paralog); ENSG00000101489(39,within_species_paralog); ENSG00000140488(40,within_species_paralog); ENSG00000161082(41,within_species_paralog)
MTHSD_HUMAN	MTHFSD	1	308-372	NULL	PF01812 PF00076	0009396 0000166 0003676 0003723 0005524 0030272	ENSMUSG00000031816(72,ortholog_one2one)	FBgn0037245(30,ortholog_one2one)
RBY1E_HUMAN	RBMY1E	1	10-79	NULL	PF08081 PF00076	0006397 0008380 0005634 0000166 0003676 0003723	ENSMUSG00000071960(30,ortholog_many2many); ENSMUSG00000069031(30,ortholog_many2many); ENSMUSG00000090652(30,ortholog_many2many); ENSMUSG00000052831(30,ortholog_many2many); ENSMUSG00000091987(31,ortholog_many2many)	FBgn0003742(8,ortholog_one2many)	C18D11.4(9,ortholog_one2many)	ENSG00000244395(100,within_species_paralog); ENSG00000242875(100,within_species_paralog); ENSG00000234414(100,within_species_paralog); ENSG00000226941(99,within_species_paralog); ENSG00000169800(99,within_species_paralog); ENSG00000147274(46,within_species_paralog); ENSG00000213516(44,within_species_paralog); ENSG00000170748(37,within_species_paralog); ENSG00000175718(30,within_species_paralog); …
DAZL_HUMAN	DAZL	1	42-108	NULL	PF00076	0006417 0007275 0007281 0007283 0030154 0045948 0005634 0005737 0000166 0003676 0003723 0005515 0008494			F56D1.7(18,ortholog_one2many)	ENSG00000205944(56,within_species_paralog); ENSG00000205916(50,within_species_paralog); ENSG00000188120(50,within_species_paralog); ENSG00000187191(49,within_species_paralog); ENSG00000152430(23,within_species_paralog)
SRSF6_HUMAN	SRSF6	2	4-64, 112-177	24	PF00076 PF08777	0000398 0006366 0006369 0006376 0006406 0008380 0010467 0031124 0048025 0005634 0005654 0000166 0003676 0003723	ENSMUSG00000016921(96,ortholog_one2one)		W02B12.3(43,ortholog_many2many); W02B12.2(35,ortholog_many2many)	ENSG00000116350(69,within_species_paralog); ENSG00000100650(48,within_species_paralog); ENSG00000136450(28,within_species_paralog); ENSG00000111786(23,within_species_paralog); ENSG00000112081(15,other_paralog); ENSG00000215699(15,other_paralog); ENSG00000161547(17,other_paralog); ENSG00000188529(15,other_paralog); ENSG00000115875(23,other_paralog); ENSG00000154548(14,other_paralog)
RA1L2_HUMAN	HNRNPA1L2	2	107-175, 16-84	33	PF00076 PF11627	0006397 0006810 0008380 0051028 0005634 0005681 0005737 0000166 0003676 0003723				ENSG00000135486(97,within_species_paralog); ENSG00000122566(60,other_paralog); ENSG00000152795(21,other_paralog); ENSG00000177733(40,other_paralog); ENSG00000153944(20,other_paralog); ENSG00000071626(20,other_paralog); ENSG00000135097(23,other_paralog); ENSG00000197451(24,other_paralog); ENSG00000138668(24,other_paralog); ENSG00000170144(60,other_paralog)
SRSF7_HUMAN	SRSF7	1	13-77	NULL	PF00076	0000398 0006366 0006369 0006397 0006406 0008380 0010467 0031124 0048025 0005634 0005654 0000166 0003676 0003723 0005515 0008270 0046872	ENSMUSG00000024097(95,ortholog_one2one)	FBgn0260944(30,ortholog_one2many); FBgn0030479(32,ortholog_one2many); FBgn0011305(30,ortholog_one2many)	C33H5.12(37,ortholog_one2many)	ENSG00000112081(38,within_species_paralog); ENSG00000161547(34,within_species_paralog); ENSG00000215699(32,within_species_paralog); ENSG00000188529(32,within_species_paralog); ENSG00000154548(26,within_species_paralog); ENSG00000124193(34,other_paralog); ENSG00000100650(30,other_paralog); ENSG00000111786(19,other_paralog); ENSG00000116350(35,other_paralog); ENSG00000136450(23,other_paralog)
NCB2L_HUMAN	NCBP2L	1	43-104	NULL	PF00076	0000166 0003676		FBgn0022943(57,ortholog_one2many)	F26A3.2(50,ortholog_one2many)	ENSG00000114503(64,within_species_paralog)
ROA0_HUMAN	HNRNPA0	2	9-75, 100-168	35	PF00076	0000398 0006397 0008380 0010467 0005634 0005654 0030530 0000166 0003676 0003723	ENSMUSG00000007836(92,ortholog_one2one)		F42A6.7(36,ortholog_one2one)	ENSG00000135097(29,within_species_paralog); ENSG00000153944(28,within_species_paralog); ENSG00000138668(22,within_species_paralog); ENSG00000152795(21,within_species_paralog); ENSG00000071626(21,within_species_paralog); ENSG00000197451(21,within_species_paralog); ENSG00000122566(39,other_paralog); ENSG00000139675(42,other_paralog); ENSG00000135486(43,other_paralog); ENSG00000170144(49,other_paral…
SRS10_HUMAN	BX511012.1 SRSF10	1	12-81	NULL	PF00076	0000244 0000375 0000398 0006355 0006376 0006406 0016482 0048025 0005634 0005654 0005737 0016607 0000166 0003676 0003723 0005515 0050733 0051082
ROA3_HUMAN	HNRNPA3	2	37-105, 128-196	34	PF00076	0000398 0008380 0010467 0051028 0005634 0005654 0005730 0005737 0030529 0030530 0071013 0000166 0003676 0003723 0003729 0051033	ENSMUSG00000059179(77,ortholog_one2one)			ENSG00000122566(56,within_species_paralog); ENSG00000152795(18,other_paralog); ENSG00000177733(39,other_paralog); ENSG00000153944(19,other_paralog); ENSG00000071626(19,other_paralog); ENSG00000139675(51,other_paralog); ENSG00000135486(54,other_paralog); ENSG00000135097(20,other_paralog); ENSG00000197451(20,other_paralog); ENSG00000138668(20,other_paralog)
SRSF2_HUMAN	SRSF2	1	18-86	NULL	PF00076	0000398 0006366 0006369 0006397 0006406 0008380 0010467 0031124 0005634 0005654 0005681 0016607 0000166 0003676 0003714 0003723 0005515	ENSMUSG00000060673(33,apparent_ortholog_one2one)	FBgn0040286(50,ortholog_one2one)	EEED8.7(43,ortholog_one2one)	ENSG00000215699(35,within_species_paralog); ENSG00000188529(35,within_species_paralog); ENSG00000154548(32,within_species_paralog); ENSG00000115875(37,within_species_paralog); ENSG00000112081(26,within_species_paralog); ENSG00000124193(26,other_paralog); ENSG00000100650(25,other_paralog); ENSG00000111786(15,other_paralog); ENSG00000116350(28,other_paralog); ENSG00000136450(21,other_paralog)
IF4B_HUMAN	EIF4B	1	99-167	NULL	PF00076	0000288 0000289 0006412 0006413 0006446 0008286 0010467 0016070 0016071 0044267 0005829 0016281 0000166 0003676 0003723 0003743	ENSMUSG00000058655(94,apparent_ortholog_one2one)	FBgn0020660(23,ortholog_one2one)		ENSG00000106682(13,within_species_paralog)
RBM41_HUMAN	RBM41	1	311-379	NULL	PF00076	0000166 0003676 0003723	ENSMUSG00000031433(86,ortholog_one2one)			ENSG00000185946(21,within_species_paralog)
SET1B_HUMAN	SETD1B	1	110-174	NULL	PF11764 PF00856 PF00076	0006355 0016568 0051568 0005634 0005694 0016607 0035097 0048188 0000166 0003676 0003723 0005515 0008168 0016740 0042800	ENSMUSG00000038384(89,ortholog_one2one)	FBgn0040022(18,ortholog_one2many)	C26E6.9(16,ortholog_one2many)	ENSG00000099381(33,within_species_paralog); ENSG00000118058(12,within_species_paralog); ENSG00000105663(12,within_species_paralog); ENSG00000106462(5,within_species_paralog); ENSG00000108799(5,within_species_paralog); ENSG00000055609(8,other_paralog); ENSG00000167548(8,other_paralog)
NCBP2_HUMAN	NCBP2	1	42-112	NULL	PF00076	0000184 0000387 0000398 0006366 0006368 0006369 0006370 0006397 0006406 0006408 0006446 0006810 0008334 0008380 0010467 0016032 0016070 0016071 0031047 0031124 0034660 0046833 0050434 0005634 0005654 0005737 0005829 0005845 0000166 0000339 0000340 0003676 0005515	ENSMUSG00000022774(98,ortholog_one2one)	FBgn0022943(69,ortholog_one2many)	F26A3.2(58,ortholog_one2many)	ENSG00000170935(63,within_species_paralog)
HNRH2_HUMAN	HNRNPH2	3	15-82, 293-355, 115-181	33 44 41	PF00076 PF08080	0000398 0008380 0010467 0005634 0005654 0005737 0015629 0030529 0030530 0000166 0003676 0003723	ENSMUSG00000045427(99,ortholog_one2one)			ENSG00000169045(96,within_species_paralog); ENSG00000169813(68,within_species_paralog); ENSG00000096746(48,within_species_paralog); ENSG00000132463(33,within_species_paralog); ENSG00000244462(15,other_paralog); ENSG00000104413(24,other_paralog); ENSG00000183808(16,other_paralog); ENSG00000103067(22,other_paralog)
CPEB3_HUMAN	CPEB3	1	443-504	NULL	PF00076	0000166 0003676 0003723	ENSMUSG00000039652(97,ortholog_one2one)	FBgn0262573(39,ortholog_one2many)	C40H1.1(23,ortholog_one2many)	ENSG00000113742(57,within_species_paralog); ENSG00000137449(52,within_species_paralog); ENSG00000214575(20,within_species_paralog)
TADBP_HUMAN	TARDBP	2	193-241, 106-171	28	PF00076	0006355 0006366 0006397 0008219 0008380 0043922 0070935 0005634 0000166 0003676 0003677 0003690 0003700 0003723 0003730 0005515	ENSMUSG00000041459(96,apparent_ortholog_one2one)	FBgn0025790(49,ortholog_one2many); FBgn0036496(38,ortholog_one2many)	F44G4.4(31,ortholog_one2one)
RAVR2_HUMAN	RAVER2	3	71-132, 235-302, 145-209	11 8 16	PF00076	0005634 0005737 0000166 0003676 0003723	ENSMUSG00000035275(78,ortholog_one2one)			ENSG00000161847(41,within_species_paralog)
HNRGT_HUMAN	RBMXL2	1	10-80	NULL	PF00076 PF08081	0005634 0030529 0000166 0003676 0003723	ENSMUSG00000073894(80,ortholog_one2many)	FBgn0003742(10,ortholog_one2many)	C18D11.4(15,ortholog_one2many)	ENSG00000175718(65,within_species_paralog); ENSG00000147274(73,within_species_paralog); ENSG00000213516(69,within_species_paralog); ENSG00000244395(47,within_species_paralog); ENSG00000242389(47,within_species_paralog); ENSG00000242875(47,within_species_paralog); ENSG00000234414(47,within_species_paralog); ENSG00000226941(47,within_species_paralog); ENSG00000169800(47,within_species_paralog); ENS…
RBM44_HUMAN	RBM44	1	833-896	NULL	PF00076	0000166 0003676 0003723	ENSMUSG00000070732(55,ortholog_one2one)
ZCRB1_HUMAN	ZCRB1	1	12-82	NULL	PF00076 PF00098	0006397 0008380 0005634 0005654 0005689 0000166 0003676 0003723 0008270 0046872	ENSMUSG00000022635(95,ortholog_one2one)	FBgn0032822(15,ortholog_one2many)	C30B5.4(20,ortholog_one2many)	ENSG00000134597(23,within_species_paralog)
RBY1F_HUMAN	RBMY1F RBMY1J	1	10-79	NULL	PF08081 PF00076	0006397 0007283 0008380 0005575 0005634 0000166 0003676 0003723
IF2B2_HUMAN	IGF2BP2	2	5-62, 86-148	13	PF00013 PF00076	0009653 0017148 0042035 0005634 0005737 0005829 0044430 0000166 0003676 0003723 0003730 0005515 0045182 0048027	ENSMUSG00000033581(95,ortholog_one2one)	FBgn0262735(31,ortholog_one2many)	M88.5(26,ortholog_one2many)	ENSG00000159217(65,within_species_paralog); ENSG00000136231(63,within_species_paralog)
SCAF8_HUMAN	SCAF8	1	479-544	NULL	PF04818 PF00076	0006366 0006397 0008380 0005634 0005681 0016363 0000166 0003676 0003723 0019904 0043175 0070063	ENSMUSG00000046201(91,ortholog_one2one)	FBgn0034598(23,ortholog_one2many)	D1007.7(18,ortholog_one2many)	ENSG00000156304(34,within_species_paralog)
MSI2H_HUMAN	MSI2	2	24-91, 112-178	44	PF00076	0048864 0005737 0005844 0000166 0003676 0003727 0008266	ENSMUSG00000069769(100,ortholog_one2one)	FBgn0260943(49,ortholog_one2many)	R10E9.1(44,ortholog_one2many)	ENSG00000135097(70,within_species_paralog); ENSG00000177733(26,within_species_paralog); ENSG00000071626(24,within_species_paralog); ENSG00000138668(23,within_species_paralog); ENSG00000152795(24,within_species_paralog); ENSG00000197451(23,within_species_paralog); ENSG00000122566(17,other_paralog); ENSG00000139675(19,other_paralog); ENSG00000135486(20,other_paralog); ENSG00000170144(22,other_paral…
ENOX2_HUMAN	ENOX2	1	130-186	NULL	PF00076	0006810 0007624 0016049 0022900 0040008 0055114 0005576 0005615 0005829 0005886 0009897 0000166 0003676 0015035 0016491	ENSMUSG00000031109(90,ortholog_one2one)	FBgn0036317(38,ortholog_one2many)		ENSG00000120658(67,within_species_paralog)
RBM3_HUMAN	RBM3	1	8-78	NULL	PF00076	0006396 0006417 0009409 0035196 0045727 0006412 0005634 0005737 0015934 0030425 0042995 0000166 0003676 0003723 0043023 0005515	ENSMUSG00000031167(95,apparent_ortholog_one2one)	FBgn0003742(24,ortholog_one2many)	C18D11.4(30,ortholog_one2many)	ENSG00000099622(68,within_species_paralog); ENSG00000147274(43,within_species_paralog); ENSG00000213516(44,within_species_paralog); ENSG00000244395(37,within_species_paralog); ENSG00000242389(37,within_species_paralog); ENSG00000242875(37,within_species_paralog); ENSG00000234414(37,within_species_paralog); ENSG00000226941(37,within_species_paralog); ENSG00000169800(37,within_species_paralog); ENS…
A1CF_HUMAN	A1CF	3	233-296, 138-199, 58-124	24 20 22	PF00076	0006397 0016554 0016556 0050821 0005622 0005634 0005654 0005720 0005737 0005783 0030895 0000166 0003676 0003723 0003727 0003729 0004131 0005515	ENSMUSG00000052595(94,ortholog_one2one)	FBgn0038826(30,ortholog_one2many)	F58D5.1(26,ortholog_one2many)	ENSG00000151962(44,within_species_paralog); ENSG00000163694(46,within_species_paralog); ENSG00000125944(31,within_species_paralog); ENSG00000135316(31,within_species_paralog); ENSG00000256453(19,within_species_paralog)
ZN638_HUMAN	ZNF638	1	679-730	NULL	PF00076	0008380 0005622 0005634 0005654 0005737 0016607 0000166 0003676 0003677 0003690 0003723 0008270 0046872	ENSMUSG00000030016(77,ortholog_one2one)			ENSG00000015479(8,within_species_paralog); ENSG00000203867(9,within_species_paralog)
U2AF4_HUMAN	U2AF1L4	1	88-140	NULL	PF00642 PF00076	0006397 0008380 0005634 0005681 0016607 0000166 0003676 0003723 0008270 0046872	ENSMUSG00000078765(53,ortholog_one2one)	FBgn0017457(44,ortholog_one2many)	Y116A8C.35(40,ortholog_one2many)	ENSG00000160201(51,within_species_paralog); ENSG00000169249(26,within_species_paralog); ENSG00000212643(26,within_species_paralog)
RBM8A_HUMAN	RBM8A	1	75-144	NULL	PF00076 PF08777	0000184 0000398 0006366 0006369 0006406 0006417 0006810 0008380 0010467 0016070 0016071 0031124 0005634 0005654 0005737 0005829 0016607 0035145 0071013 0000166 0003676 0003723 0003729 0005515		FBgn0033378(61,ortholog_one2one)	R07E5.14(45,ortholog_one2one)	ENSG00000101811(24,within_species_paralog); ENSG00000177613(24,within_species_paralog)
SNRPA_HUMAN	SNRPA	2	210-272, 12-82	14	PF00076	0000398 0008380 0010467 0005634 0005654 0005681 0000166 0003676 0003723 0005515	ENSMUSG00000061479(96,ortholog_one2many); ENSMUSG00000071273(89,ortholog_one2many)	FBgn0003449(53,ortholog_one2many)	K08D10.4(38,ortholog_many2many); K08D10.3(38,ortholog_many2many)	ENSG00000125870(55,within_species_paralog)
HNRPL_HUMAN	HNRNPL	2	106-155, 204-257	26	PF00076	0000398 0006396 0006397 0008380 0010467 0005634 0005654 0005737 0030529 0030530 0045120 0000166 0003676 0003723 0005515 0044212	ENSMUSG00000015165(96,ortholog_one2one)	FBgn0003435(30,ortholog_one2many)	C44B7.2(32,ortholog_one2many)	ENSG00000143889(48,within_species_paralog); ENSG00000011304(21,within_species_paralog); ENSG00000117569(21,within_species_paralog); ENSG00000119314(21,within_species_paralog)
CPSF6_HUMAN	CPSF6	1	83-152	NULL	PF00076	0006378 0006397 0051262 0005634 0005849 0030529 0042382 0000166 0003676 0003723 0003729 0005515	ENSMUSG00000055531(100,ortholog_one2one)	FBgn0035872(42,ortholog_one2many)	D1046.1(27,ortholog_one2many)	ENSG00000149532(44,within_species_paralog); ENSG00000143368(11,within_species_paralog); ENSG00000168175(7,within_species_paralog); ENSG00000104897(9,within_species_paralog)
RBM22_HUMAN	RBM22	1	234-298	NULL	PF00076	0000060 0000398 0008380 0005634 0005737 0071013 0000166 0003676 0003723 0008270 0046872 0048306	ENSMUSG00000024604(100,ortholog_one2one)	FBgn0037220(59,ortholog_one2one)	T11G6.8(52,ortholog_one2one)
RU2B_HUMAN	SNRPB2	2	153-212, 9-79	26	PF00076	0000398 0006397 0008380 0010467 0005634 0005654 0005681 0005686 0071013 0000166 0003676 0003723 0005515	ENSMUSG00000008333(96,ortholog_one2one)	FBgn0003449(64,ortholog_one2many)	K08D10.4(44,ortholog_many2many); K08D10.3(46,ortholog_many2many)	ENSG00000077312(68,within_species_paralog)
PABP3_HUMAN	PABPC3	4	101-168, 13-83, 296-363, 193-261	32 38 44 29 28 51	PF00076 PF00658	0016071 0005737 0000166 0003676 0003723 0008143		FBgn0261619(55,ortholog_one2many)	Y106G6H.2(51,ortholog_many2many); F18H3.3(50,ortholog_many2many)	ENSG00000070756(93,within_species_paralog); ENSG00000090621(73,within_species_paralog); ENSG00000184388(23,within_species_paralog); ENSG00000186288(23,within_species_paralog); ENSG00000101104(64,within_species_paralog); ENSG00000174740(36,within_species_paralog); ENSG00000196361(9,other_paralog); ENSG00000153250(9,other_paralog); ENSG00000107105(10,other_paralog); ENSG00000066044(10,other_paralog…
ROA2_HUMAN	HNRNPA2B1	2	114-181, 23-91	39	PF00076 PF11627	0000398 0006397 0008380 0010467 0050658 0005634 0005654 0005681 0005730 0005737 0030529 0030530 0071013 0000166 0003676 0003723 0005515 0043047	ENSMUSG00000004980(99,apparent_ortholog_one2one)			ENSG00000170144(59,within_species_paralog); ENSG00000152795(19,other_paralog); ENSG00000177733(34,other_paralog); ENSG00000153944(16,other_paralog); ENSG00000071626(20,other_paralog); ENSG00000139675(55,other_paralog); ENSG00000135486(59,other_paralog); ENSG00000135097(19,other_paralog); ENSG00000197451(20,other_paralog); ENSG00000138668(20,other_paralog)
EIF3B_HUMAN	EIF3B	1	207-257	NULL	PF08662 PF00076	0006412 0006413 0006446 0010467 0044267 0005737 0005829 0005852 0000166 0003676 0003723 0003743 0005515 0032947	ENSMUSG00000056076(90,ortholog_one2one)	FBgn0034237(43,ortholog_one2one)	Y54E2A.11(29,ortholog_one2one)
TRA2B_HUMAN	TRA2B	1	122-190	NULL	PF00076	0000375 0000381 0000398 0048026 0000302 0005634 0000166 0003676 0003729 0005515	ENSMUSG00000022858(100,ortholog_one2one)	FBgn0003742(31,ortholog_one2many)	C18D11.4(39,ortholog_one2many)	ENSG00000164548(68,within_species_paralog); ENSG00000099622(19,within_species_paralog); ENSG00000147274(18,within_species_paralog); ENSG00000213516(17,within_species_paralog); ENSG00000102317(16,within_species_paralog); ENSG00000244395(16,within_species_paralog); ENSG00000242389(16,within_species_paralog); ENSG00000242875(16,within_species_paralog); ENSG00000234414(16,within_species_paralog); ENS…
RFOX2_HUMAN	RBFOX2	1	124-191	NULL	PF12414 PF00076	0003676 0000381 0006397 0008380 0016070 0030520 0042127 0045892 0010724 0005634 0005737 0000166 0003714 0003723 0005515 0008134	ENSMUSG00000033565(94,ortholog_one2one)		ZC404.8(17,ortholog_one2many)	ENSG00000078328(55,within_species_paralog); ENSG00000167281(47,within_species_paralog)
ROAA_HUMAN	HNRNPAB	2	72-139, 155-224	39	PF00076 PF08143	0001837 0045893 0005737 0005634 0003676 0003700 0005515 0043565	ENSMUSG00000020358(92,ortholog_one2one)	FBgn0086897(27,ortholog_one2many)		ENSG00000138668(62,within_species_paralog); ENSG00000152795(55,within_species_paralog); ENSG00000135097(25,within_species_paralog); ENSG00000153944(23,within_species_paralog); ENSG00000177733(20,within_species_paralog); ENSG00000071626(24,within_species_paralog); ENSG00000122566(22,other_paralog); ENSG00000139675(23,other_paralog); ENSG00000135486(22,other_paralog); ENSG00000170144(22,other_paral…
PUF60_HUMAN	PUF60	2	131-201, 228-297	41	PF00076	0003676	ENSMUSG00000002524(99,ortholog_one2one)	FBgn0028577(50,ortholog_one2one)	Y47G6A.20(43,ortholog_one2one)	ENSG00000144642(8,within_species_paralog); ENSG00000076067(9,within_species_paralog); ENSG00000153250(9,within_species_paralog); ENSG00000196361(10,other_paralog); ENSG00000184388(4,other_paralog); ENSG00000107105(9,other_paralog); ENSG00000090621(11,other_paralog); ENSG00000101104(10,other_paralog); ENSG00000186288(4,other_paralog); ENSG00000066044(9,other_paralog); ENSG00000070756(10,other_para…
THOC4_HUMAN	THOC4	1	108-176	NULL	PF00076	0000398 0006366 0006369 0006406 0006810 0008380 0010467 0031124 0044419 0046784 0000346 0005634 0005654 0005737 0005829 0016607 0071013 0000166 0003676 0003723 0005515	ENSMUSG00000025134(94,ortholog_one2many); ENSMUSG00000060244(75,ortholog_one2many); ENSMUSG00000091145(64,ortholog_one2many); ENSMUSG00000091918(64,ortholog_one2many); ENSMUSG00000091915(64,ortholog_one2many); ENSMUSG00000086151(63,ortholog_one2many); ENSMUSG00000091779(66,ortholog_one2many); ENSMUSG00000090854(66,ortholog_one2many); ENSMUSG00000091335(66,ortholog_one2many); ENSMUSG00000091715(65…	FBgn0010774(44,ortholog_one2many); FBgn0032439(27,ortholog_one2many)
ELAV3_HUMAN	ELAVL3	3	127-190, 41-111, 286-355	39 28 30	PF00076	0007275 0007399 0030154 0000166 0003676 0003723 0017091	ENSMUSG00000003410(99,ortholog_one2one)	FBgn0010263(55,ortholog_many2many); FBgn0086675(55,ortholog_many2many); FBgn0260400(51,ortholog_many2many)	F35H8.5(50,ortholog_one2many)	ENSG00000162374(81,within_species_paralog); ENSG00000107105(80,within_species_paralog); ENSG00000066044(62,within_species_paralog); ENSG00000184388(7,other_paralog); ENSG00000153250(21,other_paralog); ENSG00000090621(18,other_paralog); ENSG00000101104(19,other_paralog); ENSG00000186288(7,other_paralog); ENSG00000144642(22,other_paralog); ENSG00000070756(17,other_paralog); ENSG00000076067(20,other…
U2AFL_HUMAN	ZRSR1	1	246-302	NULL	PF00642 PF00076	0008150 0005634 0030529 0000166 0003676 0003723 0008270 0046872		FBgn0031628(19,ortholog_one2many)	Y116A8C.35(16,ortholog_one2many)	ENSG00000169249(93,within_species_paralog); ENSG00000160201(16,within_species_paralog); ENSG00000161265(11,within_species_paralog)
SFR15_HUMAN	SCAF4	1	510-573	NULL	PF04818 PF00076	0006397 0005634 0000166 0003676 0003723 0008022	ENSMUSG00000022983(89,ortholog_one2one)	FBgn0034598(28,ortholog_one2many)	D1007.7(21,ortholog_one2many)	ENSG00000213079(38,within_species_paralog)
RBM15_HUMAN	RBM15	1	376-444	NULL	PF07744 PF00076	0000122 0001569 0006355 0007221 0044419 0045638 0048536 0060412 0060674 0005634 0000166 0003676 0003723 0005488 0005515	ENSMUSG00000048109(93,ortholog_one2one)	FBgn0027548(28,ortholog_one2many)	F29C4.7(15,ortholog_one2many)	ENSG00000179837(40,within_species_paralog); ENSG00000065526(23,within_species_paralog)
DND1_HUMAN	DND1	1	60-123	NULL	PF00076	0007275 0007281 0060965 0005634 0005737 0000166 0003676 0017091 0005515	ENSMUSG00000044595(86,ortholog_one2one)	FBgn0038826(22,ortholog_one2many)	F58D5.1(19,ortholog_one2many)	ENSG00000151962(30,within_species_paralog); ENSG00000148584(31,within_species_paralog); ENSG00000163694(28,within_species_paralog); ENSG00000125944(23,within_species_paralog); ENSG00000135316(21,within_species_paralog)
PTBP1_HUMAN	PTBP1	3	339-405, 186-250, 458-518	24 24 24	PF00076	0000381 0000398 0006397 0008380 0010467 0048025 0051148 0005634 0005654 0005730 0030530 0000166 0003676 0003723 0003729 0005515 0008187	ENSMUSG00000006498(97,apparent_ortholog_one2one)	FBgn0011224(55,ortholog_one2many)	D2089.4(46,ortholog_one2many)	ENSG00000119314(75,within_species_paralog); ENSG00000117569(71,within_species_paralog); ENSG00000104824(23,within_species_paralog); ENSG00000143889(22,within_species_paralog)
SAFB1_HUMAN	SAFB	1	409-477	NULL	PF00076 PF02037	0006325 0006355 0030520 0040007 0042445 0045944 0005634 0000166 0003676 0003677 0003690 0003723 0005515 0003682 0001047	ENSMUSG00000071054(86,ortholog_one2one)	FBgn0039229(13,ortholog_one2many)	C16C10.6(3,ortholog_one2many)	ENSG00000130254(73,within_species_paralog); ENSG00000137776(33,within_species_paralog); ENSG00000126653(4,within_species_paralog); ENSG00000159450(5,within_species_paralog); ENSG00000123200(15,within_species_paralog); ENSG00000107581(5,within_species_paralog)
CIRBP_HUMAN	CIRBP	1	8-78	NULL	PF00076	0009409 0009411 0017148 0034063 0045727 0048255 0005634 0005654 0005737 0010494 0000166 0003676 0003723 0003730 0005515 0030371 0070181	ENSMUSG00000045193(95,ortholog_one2one)	FBgn0003742(23,ortholog_one2many)	C18D11.4(30,ortholog_one2many)	ENSG00000102317(62,within_species_paralog); ENSG00000147274(47,within_species_paralog); ENSG00000213516(47,within_species_paralog); ENSG00000244395(40,within_species_paralog); ENSG00000242389(40,within_species_paralog); ENSG00000242875(40,within_species_paralog); ENSG00000234414(40,within_species_paralog); ENSG00000226941(39,within_species_paralog); ENSG00000169800(39,within_species_paralog); ENS…
SFPQ_HUMAN	SFPQ	2	374-433, 299-363	16	PF00076 PF08075	0000380 0006281 0006310 0006355 0006397 0008380 0005634 0005654 0016363 0042382 0000166 0003676 0003677 0003723 0005515	ENSMUSG00000028820(93,ortholog_one2one)	FBgn0004227(27,ortholog_many2many); FBgn0015520(25,ortholog_many2many)	F25B5.7(25,ortholog_one2many)	ENSG00000121390(39,within_species_paralog); ENSG00000147140(37,within_species_paralog)
DJC17_HUMAN	DNAJC17	1	189-233	NULL	PF00226 PF00076	0006457 0000166 0003676 0003723 0031072 0051082	ENSMUSG00000034278(88,apparent_ortholog_one2one)	FBgn0037882(42,ortholog_one2one)	T23B12.7(22,ortholog_one2one)	ENSG00000108176(16,within_species_paralog)
G3BP1_HUMAN	G3BP1	1	342-396	NULL	PF02136 PF00076	0006810 0007265 0005622 0005634 0005737 0005829 0005886 0000166 0003676 0003677 0003723 0004003 0004004 0004386 0004519 0005515 0005524 0016787	ENSMUSG00000018583(94,ortholog_one2one)	FBgn0015778(38,ortholog_one2many)	K08F4.2(19,ortholog_one2many)	ENSG00000138757(65,within_species_paralog)
RU17_HUMAN	SNRNP70	1	105-174	NULL	PF12220 PF00076	0000398 0006397 0008380 0010467 0043484 0005634 0005654 0005681 0000166 0003676 0003723 0005515	ENSMUSG00000063511(98,ortholog_one2one)	FBgn0016978(48,ortholog_one2one)	K04G7.10(32,ortholog_one2many)	ENSG00000184209(22,within_species_paralog)
RNPS1_HUMAN	RNPS1	1	165-234	NULL	PF00076	0000184 0000398 0006351 0006366 0006369 0006406 0008380 0010467 0016070 0016071 0031124 0005634 0005654 0005737 0005829 0016607 0035145 0000166 0003676 0003723 0003730 0005515	ENSMUSG00000034681(69,apparent_ortholog_one2one)	FBgn0037707(43,ortholog_one2many); FBgn0085363(28,ortholog_one2many)	K02F3.11(34,ortholog_one2many)	ENSG00000155329(9,within_species_paralog); ENSG00000100941(18,within_species_paralog)
SRSF5_HUMAN	SRSF5	2	6-67, 110-175	25	PF00076	0000398 0006366 0006369 0006376 0006397 0006406 0008380 0010467 0031124 0005634 0005654 0016607 0000166 0003676 0003723 0005515	ENSMUSG00000021134(98,ortholog_one2one)		W02B12.3(46,ortholog_many2many); W02B12.2(40,ortholog_many2many)	ENSG00000116350(58,within_species_paralog); ENSG00000124193(61,within_species_paralog); ENSG00000136450(31,within_species_paralog); ENSG00000111786(27,within_species_paralog); ENSG00000112081(19,other_paralog); ENSG00000215699(18,other_paralog); ENSG00000161547(20,other_paralog); ENSG00000188529(18,other_paralog); ENSG00000115875(26,other_paralog); ENSG00000154548(18,other_paralog)
MSI1H_HUMAN	MSI1	2	111-177, 23-90	47	PF00076	0007399 0009725 0030855 0005634 0005737 0005844 0000166 0003676 0003723 0003727 0008266	ENSMUSG00000054256(99,ortholog_one2one)	FBgn0260943(48,ortholog_one2many)	R10E9.1(42,ortholog_one2many)	ENSG00000153944(64,within_species_paralog); ENSG00000177733(24,within_species_paralog); ENSG00000071626(24,within_species_paralog); ENSG00000138668(23,within_species_paralog); ENSG00000152795(24,within_species_paralog); ENSG00000197451(23,within_species_paralog); ENSG00000122566(19,other_paralog); ENSG00000139675(20,other_paralog); ENSG00000135486(20,other_paralog); ENSG00000170144(20,other_paral…
RALYL_HUMAN	RALYL	1	23-85	NULL	PF00076	0000166 0003676 0003723	ENSMUSG00000039717(90,ortholog_one2one)	FBgn0259935(15,ortholog_one2many)		ENSG00000125970(53,within_species_paralog); ENSG00000092199(46,within_species_paralog); ENSG00000179172(42,within_species_paralog)
HNRPF_HUMAN	HNRNPF	2	115-181, 293-356	42	PF00076 PF08080	0000398 0006396 0008380 0010467 0043484 0005634 0005654 0005737 0030529 0030530 0071013 0000166 0003676 0003723 0003727 0005515 0017025	ENSMUSG00000042079(98,ortholog_one2one)			ENSG00000169045(76,within_species_paralog); ENSG00000126945(74,within_species_paralog); ENSG00000096746(46,within_species_paralog); ENSG00000132463(35,within_species_paralog); ENSG00000244462(17,other_paralog); ENSG00000104413(24,other_paralog); ENSG00000183808(17,other_paralog); ENSG00000103067(23,other_paralog)
DAZ4_HUMAN	DAZ1	2	207-263, 42-98	100	PF00076	0007275 0007283 0030154 0045948 0005634 0005737 0000166 0003676 0003723 0005515 0008494	ENSMUSG00000010592(19,ortholog_one2many)		F56D1.7(7,ortholog_one2many)	ENSG00000205916(78,within_species_paralog); ENSG00000187191(54,within_species_paralog); ENSG00000205944(53,within_species_paralog); ENSG00000092345(21,within_species_paralog); ENSG00000152430(9,within_species_paralog)
GRSF1_HUMAN	GRSF1	1	254-319	NULL	PF00076	0006378 0009952 0016331 0005737 0005739 0000166 0003676 0003723 0003729	ENSMUSG00000044221(91,ortholog_one2one)			ENSG00000096746(22,within_species_paralog); ENSG00000169045(31,within_species_paralog); ENSG00000126945(31,within_species_paralog); ENSG00000169813(30,within_species_paralog); ENSG00000244462(14,other_paralog); ENSG00000104413(18,other_paralog); ENSG00000183808(13,other_paralog); ENSG00000103067(17,other_paralog)
DAZ1_HUMAN	DAZ1	3	207-263, 372-428, 42-98	100 100 100	PF00076	0007275 0007283 0030154 0045948 0005634 0005737 0000166 0003676 0003723 0005515 0008494	ENSMUSG00000010592(19,ortholog_one2many)		F56D1.7(7,ortholog_one2many)	ENSG00000205916(78,within_species_paralog); ENSG00000187191(54,within_species_paralog); ENSG00000205944(53,within_species_paralog); ENSG00000092345(21,within_species_paralog); ENSG00000152430(9,within_species_paralog)
RBM12_HUMAN	RBM12	3	432-498, 859-928, 548-613	22 22 22	PF00076	0005634 0000166 0003676 0003723	ENSMUSG00000089824(93,ortholog_one2one)	FBgn0035235(19,ortholog_one2many)	Y106G6D.7(18,ortholog_one2many)	ENSG00000183808(27,within_species_paralog); ENSG00000104413(7,within_species_paralog); ENSG00000103067(7,within_species_paralog); ENSG00000096746(5,other_paralog); ENSG00000132463(7,other_paralog); ENSG00000169813(7,other_paralog); ENSG00000126945(7,other_paralog); ENSG00000169045(7,other_paralog)
NELFE_HUMAN	RDBP	1	269-323	NULL	PF00076	0006355 0006366 0006368 0008150 0010467 0016032 0050434 0005634 0005654 0005739 0000166 0003676 0003723 0003746
U2AFM_HUMAN	ZRSR2	1	241-297	NULL	PF00642 PF00076	0000245 0000398 0008380 0005634 0005689 0000166 0003676 0003723 0005515 0008270 0030628 0046872		FBgn0031628(20,ortholog_one2many)	Y116A8C.35(17,ortholog_one2many)	ENSG00000212643(92,within_species_paralog); ENSG00000160201(17,within_species_paralog); ENSG00000161265(11,within_species_paralog)
PABP4_HUMAN	PABPC4	4	13-83, 296-363, 101-168, 193-261	32 29 34 42 50 45	PF00076 PF00658	0006396 0006401 0006412 0007596 0005737 0030529 0000166 0003676 0003723 0005515 0008143 0008266	ENSMUSG00000062093(91,ortholog_one2many); ENSMUSG00000011257(98,ortholog_one2many)	FBgn0261619(56,ortholog_one2many)	Y106G6H.2(52,ortholog_many2many); F18H3.3(52,ortholog_many2many)	ENSG00000070756(75,within_species_paralog); ENSG00000184388(23,within_species_paralog); ENSG00000186288(23,within_species_paralog); ENSG00000151846(69,within_species_paralog); ENSG00000174740(37,within_species_paralog); ENSG00000101104(62,within_species_paralog); ENSG00000196361(10,other_paralog); ENSG00000153250(9,other_paralog); ENSG00000107105(10,other_paralog); ENSG00000066044(10,other_paralo…
TIA1_HUMAN	TIA1	3	108-178, 9-77, 216-280	27 33 36	PF00076	0006915 0006917 0017148 0042036 0048024 0005634 0005737 0000166 0003676 0005515 0008143 0017091	ENSMUSG00000071337(97,apparent_ortholog_one2one)	FBgn0005649(46,ortholog_many2many); FBgn0085383(38,ortholog_many2many); FBgn0085391(40,ortholog_many2many)	C18A3.5(41,ortholog_many2many); Y46G5A.13(36,ortholog_many2many); C07A4.1(28,ortholog_many2many)	ENSG00000151923(76,within_species_paralog); ENSG00000100461(15,within_species_paralog); ENSG00000131051(17,within_species_paralog)
ROD1_HUMAN	ROD1	3	479-539, 184-248, 360-426	22 18 24	PF00076	0006397 0009653 0005634 0000166 0003676 0003723	ENSMUSG00000028382(94,ortholog_one2one)	FBgn0011224(52,ortholog_one2many)	D2089.4(44,ortholog_one2many)	ENSG00000011304(75,within_species_paralog); ENSG00000117569(66,within_species_paralog); ENSG00000104824(23,within_species_paralog); ENSG00000143889(22,within_species_paralog)
HNRPG_HUMAN	RBMX	1	10-80	NULL	PF00076 PF08081	0000381 0000398 0006366 0006509 0008380 0010467 0045944 0048025 0048026 0051260 0071347 0005634 0005654 0005681 0005719 0030530 0070062 0071013 0000166 0001047 0003676 0003682 0003723 0003729 0005515	ENSMUSG00000037070(98,ortholog_one2one)	FBgn0003742(10,ortholog_one2many)	C18D11.4(14,ortholog_one2many)	ENSG00000213516(95,within_species_paralog); ENSG00000244395(59,within_species_paralog); ENSG00000242389(59,within_species_paralog); ENSG00000242875(59,within_species_paralog); ENSG00000234414(59,within_species_paralog); ENSG00000226941(59,within_species_paralog); ENSG00000169800(59,within_species_paralog); ENSG00000170748(73,within_species_paralog); ENSG00000175718(55,within_species_paralog); ENS…
RBM39_HUMAN	RBM39	2	155-220, 252-322	19	PF00076	0006355 0006396 0006397 0008380 0005634 0005654 0005813 0015630 0016607 0000166 0003676 0003723 0005515	ENSMUSG00000027620(100,ortholog_one2one)	FBgn0031883(35,ortholog_one2many)	Y55F3AM.3(44,ortholog_one2many)	ENSG00000100461(50,within_species_paralog); ENSG00000116001(12,within_species_paralog); ENSG00000151923(11,within_species_paralog)
SRSF4_HUMAN	SRSF4	2	106-171, 4-64	22	PF00076	0000375 0000398 0006366 0006369 0006397 0006406 0008380 0010467 0031124 0048025 0005634 0005654 0016607 0000166 0003676 0003723	ENSMUSG00000028911(89,ortholog_one2one)		W02B12.3(30,ortholog_many2many); W02B12.2(25,ortholog_many2many)	ENSG00000124193(48,within_species_paralog); ENSG00000100650(32,within_species_paralog); ENSG00000136450(20,within_species_paralog); ENSG00000111786(17,within_species_paralog); ENSG00000112081(11,other_paralog); ENSG00000215699(13,other_paralog); ENSG00000161547(12,other_paralog); ENSG00000188529(13,other_paralog); ENSG00000115875(17,other_paralog); ENSG00000154548(12,other_paralog)
RBM19_HUMAN	RBM19	5	834-904, 4-72, 732-804, 404-473, 302-362	30 25 24 22 31 28 13 34 19 14	PF00076	0007275 0040019 0005634 0005654 0005694 0005730 0005737 0000166 0003676 0003723	ENSMUSG00000029594(81,ortholog_one2one)	FBgn0036018(38,ortholog_one2one)	T23F6.4(35,ortholog_one2one)
CSTF2_HUMAN	CSTF2	1	18-88	NULL	PF00076	0000398 0006366 0006369 0006378 0006379 0006397 0008380 0010467 0031124 0005634 0005654 0005847 0071920 0000166 0003676 0003723 0005515	ENSMUSG00000031256(94,ortholog_one2one)	FBgn0027841(39,ortholog_one2many)	F56A8.6(26,ortholog_one2many)	ENSG00000177613(74,within_species_paralog); ENSG00000131795(7,within_species_paralog)
EWS_HUMAN	EWSR1	1	363-441	NULL	PF00641 PF00076	0006355 0005622 0005634 0005737 0005886 0000166 0003676 0003723 0005515 0005516 0008270 0046872	ENSMUSG00000009079(98,ortholog_one2one)	FBgn0011571(20,ortholog_many2many); FBgn0037939(12,ortholog_many2many)	C27H5.3(15,ortholog_many2many); F10E7.2(4,ortholog_many2many)	ENSG00000089280(36,within_species_paralog); ENSG00000172660(30,within_species_paralog); ENSG00000109534(9,within_species_paralog)
HNRPD_HUMAN	HNRNPD	2	100-167, 184-243	46	PF00076 PF08143	0000398 0006355 0006396 0006401 0008380 0010467 0016070 0016071 0045893 0048255 0043488 0005634 0005654 0005737 0005829 0030529 0030530 0000166 0003676 0003677 0003723 0005515 0042162	ENSMUSG00000000568(95,ortholog_one2one)	FBgn0086897(26,ortholog_one2many)		ENSG00000152795(57,within_species_paralog); ENSG00000197451(58,within_species_paralog); ENSG00000135097(24,within_species_paralog); ENSG00000153944(22,within_species_paralog); ENSG00000177733(19,within_species_paralog); ENSG00000071626(21,within_species_paralog); ENSG00000122566(20,other_paralog); ENSG00000139675(21,other_paralog); ENSG00000135486(21,other_paralog); ENSG00000170144(21,other_paral…
HNRPM_HUMAN	HNRNPM	3	74-143, 655-722, 206-274	42 31 42	PF00076 PF11532	0000380 0000398 0008380 0010467 0005634 0005654 0005681 0005887 0016363 0042382 0071013 0000166 0003676 0003723 0005515 0019904	ENSMUSG00000059208(98,apparent_ortholog_one2one)	FBgn0260010(22,ortholog_one2many)	C25A1.4(19,ortholog_one2many)	ENSG00000104177(42,within_species_paralog)
RBM40_HUMAN	RNPC3	2	422-496, 29-95	25	PF00076	0006397 0008380 0005634 0005689 0000166 0003676 0003723	ENSMUSG00000027981(89,ortholog_one2one)			ENSG00000089682(16,within_species_paralog)
NUCL_HUMAN	NCL	4	574-640, 309-377, 398-459, 488-554	28 35 38 14 11 43	PF00076	0001525 0005634 0005654 0005730 0005737 0005938 0030529 0000166 0003676 0003677 0003723 0005515 0008022 0042162	ENSMUSG00000026234(82,ortholog_one2one)	FBgn0002780(15,apparent_ortholog_one2one)	K07H8.10(15,ortholog_one2one)	ENSG00000075856(17,within_species_paralog)
CELF6_HUMAN	CELF6	3	136-198, 398-467, 48-115	28 39 25	PF00076	0000381 0006397 0005634 0005737 0000166 0003676 0003723	ENSMUSG00000032297(92,ortholog_one2one)		C17D12.2(49,ortholog_one2many)	ENSG00000101489(65,within_species_paralog); ENSG00000159409(64,within_species_paralog); ENSG00000161082(62,within_species_paralog); ENSG00000048740(43,within_species_paralog); ENSG00000149187(42,within_species_paralog)
U2AF1_HUMAN	U2AF1	1	91-141	NULL	PF00642 PF00076	0000398 0006366 0006369 0006397 0006406 0008380 0010467 0031124 0005634 0005654 0005681 0015030 0016607 0071013 0000166 0003676 0003723 0005515 0008270 0046872 0050733	ENSMUSG00000061613(97,apparent_ortholog_one2one)	FBgn0017457(77,ortholog_one2many)	Y116A8C.35(63,ortholog_one2many)	ENSG00000161265(43,within_species_paralog); ENSG00000169249(34,within_species_paralog); ENSG00000212643(33,within_species_paralog)
RBM28_HUMAN	RBM28	3	337-395, 116-184, 6-68	37 25 28	PF00076	0006397 0008380 0005634 0005681 0005730 0005794 0000166 0003676 0003723	ENSMUSG00000029701(81,ortholog_one2one)	FBgn0260456(30,ortholog_one2one)	R05H10.2(27,ortholog_one2one)
TRA2A_HUMAN	TRA2A	1	123-191	NULL	PF00076	0000398 0008380 0005634 0000166 0003676 0003723 0005515	ENSMUSG00000029817(99,ortholog_one2one)	FBgn0003742(29,ortholog_one2many)	C18D11.4(39,ortholog_one2many)	ENSG00000136527(69,within_species_paralog); ENSG00000099622(20,within_species_paralog); ENSG00000147274(18,within_species_paralog); ENSG00000213516(17,within_species_paralog); ENSG00000102317(16,within_species_paralog); ENSG00000244395(15,within_species_paralog); ENSG00000242389(15,within_species_paralog); ENSG00000242875(15,within_species_paralog); ENSG00000234414(15,within_species_paralog); ENS…
BOLL_HUMAN	BOLL	1	35-103	NULL	PF00076 PF08777	0006417 0007126 0007275 0007283 0030154 0045948 0005737 0000166 0003676 0003723 0005515 0008494	ENSMUSG00000025977(90,ortholog_one2one)	FBgn0011206(17,ortholog_one2one)	F56D1.7(27,ortholog_one2many)	ENSG00000092345(24,within_species_paralog); ENSG00000205944(25,within_species_paralog); ENSG00000205916(23,within_species_paralog); ENSG00000188120(23,within_species_paralog); ENSG00000187191(23,within_species_paralog)
LA_HUMAN	SSB	1	113-178	NULL	PF08777 PF05383 PF00076	0006396 0006400 0008334 0005634 0030529 0000049 0000166 0003676 0003723 0003729	ENSMUSG00000068882(80,apparent_ortholog_one2one)		C44E4.4(28,ortholog_one2many)	ENSG00000174720(23,within_species_paralog)
PAP1M_HUMAN	PABPC1L2B PABPC1L2A	2	92-159, 4-74	26	PF00076	0000166 0003676 0003723
HNRH3_HUMAN	HNRNPH3	2	199-262, 20-86	40	PF00076	0000398 0006396 0008380 0005634 0030530 0000166 0003676 0003723	ENSMUSG00000020069(99,ortholog_one2one)			ENSG00000169045(63,within_species_paralog); ENSG00000126945(63,within_species_paralog); ENSG00000169813(55,within_species_paralog); ENSG00000132463(31,within_species_paralog); ENSG00000244462(14,other_paralog); ENSG00000104413(19,other_paralog); ENSG00000183808(14,other_paralog); ENSG00000103067(18,other_paralog)
CELF3_HUMAN	CELF3	3	382-451, 9-76, 97-161	20 30 38	PF00076	0000381 0000398 0007283 0008380 0030317 0048026 0005634 0005737 0000166 0003676 0003723 0003729	ENSMUSG00000028137(100,ortholog_one2one)		C17D12.2(52,ortholog_one2many)	ENSG00000101489(67,within_species_paralog); ENSG00000140488(67,within_species_paralog); ENSG00000161082(64,within_species_paralog); ENSG00000048740(46,within_species_paralog); ENSG00000149187(44,within_species_paralog)
PDIP3_HUMAN	POLDIP3	1	284-344	NULL	PF00076	0003676 0045727 0005634 0005737 0016607 0035145 0043231 0000166 0003723 0005515	ENSMUSG00000041815(91,ortholog_one2one)	FBgn0030956(28,ortholog_one2many); FBgn0030959(28,ortholog_one2many)
RBM7_HUMAN	RBM7	1	12-81	NULL	PF00076	0003676	ENSMUSG00000042396(83,ortholog_one2one)	FBgn0031224(18,ortholog_one2many)	Y37D8A.21(21,ortholog_one2many)	ENSG00000185272(29,within_species_paralog)
NOL8_HUMAN	NOL8	1	10-79	NULL	PF00076	0006260 0006364 0030307 0005634 0005730 0000166 0003676 0003723 0005515	ENSMUSG00000021392(63,ortholog_one2one)	FBgn0031062(15,ortholog_one2one)	K07F5.14(11,ortholog_one2one)
PRGC2_HUMAN	PPARGC1B	1	904-955	NULL	PF00076	0001503 0006390 0007015 0010694 0030520 0034614 0042327 0045672 0045780 0045892 0045944 0051384 0051591 0060346 2000273 0005634 0016592 0000166 0001104 0003676 0003723 0030331 0030374 0030546 0050682	ENSMUSG00000033871(77,ortholog_one2one)	FBgn0037248(10,ortholog_one2many)		ENSG00000109819(20,within_species_paralog); ENSG00000148840(18,within_species_paralog)
TIAR_HUMAN	TIAL1	3	99-169, 11-79, 207-271	27 33 35	PF00076	0006357 0006915 0006917 0006952 0005634 0005737 0005764 0010494 0000166 0003676 0003723	ENSMUSG00000030846(99,ortholog_one2one)	FBgn0005649(46,ortholog_many2many); FBgn0085383(38,ortholog_many2many); FBgn0085391(38,ortholog_many2many)	C18A3.5(39,ortholog_many2many); Y46G5A.13(36,ortholog_many2many); C07A4.1(28,ortholog_many2many)	ENSG00000116001(75,within_species_paralog); ENSG00000100461(14,within_species_paralog); ENSG00000131051(15,within_species_paralog)
RBM42_HUMAN	RBM42	1	383-453	NULL	PF00076	0005634 0005737 0000166 0003676 0003723	ENSMUSG00000036733(97,ortholog_one2one)	FBgn0037342(27,ortholog_one2one)	Y54H5A.3(27,ortholog_one2one)
MINT_HUMAN	SPEN	4	339-406, 440-507, 8-68, 520-583	14 19 20 26 25 19	PF00076 PF07744	0006355 0007219 0044419 0045892 0045893 0006351 0005634 0000166 0003676 0003677 0003697 0003700 0003714 0003723 0005488 0005515	ENSMUSG00000040761(81,ortholog_one2one)	FBgn0016977(21,ortholog_one2one)	F29C4.7(3,ortholog_one2many)	ENSG00000162775(6,within_species_paralog); ENSG00000179837(5,within_species_paralog)
PABP2_HUMAN	PABPN1	1	174-243	NULL	PF00076	0000398 0006366 0006369 0006396 0006397 0006936 0008380 0010467 0016973 0019048 0019054 0019058 0031124 0046778 0005634 0005654 0005737 0030529 0000166 0003676 0003723 0005515	ENSMUSG00000022194(97,ortholog_one2one)	FBgn0005648(41,ortholog_one2many)	C17E4.5(34,ortholog_one2many)	ENSG00000258643(67,within_species_paralog); ENSG00000205022(36,within_species_paralog)
RBM24_HUMAN	RBM24	1	13-70	NULL	PF00076	0010830 0030154 0043488 0005634 0005737 0000166 0003676 0003723 0003730	ENSMUSG00000038132(99,ortholog_one2one)		T22B2.4(46,ortholog_one2many)	ENSG00000132819(67,within_species_paralog)
ELAV2_HUMAN	ELAVL2	3	41-111, 127-193, 278-347	40 31 26	PF00076	0006355 0000166 0003676 0003723 0003730 0005515	ENSMUSG00000008489(100,ortholog_one2one)	FBgn0010263(60,ortholog_many2many); FBgn0086675(58,ortholog_many2many); FBgn0260400(54,ortholog_many2many)	F35H8.5(52,ortholog_one2many)	ENSG00000162374(90,within_species_paralog); ENSG00000196361(81,within_species_paralog); ENSG00000066044(67,within_species_paralog); ENSG00000184388(7,other_paralog); ENSG00000153250(22,other_paralog); ENSG00000090621(18,other_paralog); ENSG00000101104(19,other_paralog); ENSG00000186288(7,other_paralog); ENSG00000144642(22,other_paralog); ENSG00000070756(18,other_paralog); ENSG00000076067(22,other…
STPAP_HUMAN	TUT1	1	58-121	NULL	PF03828 PF00076	0006378 0006379 0016180 0005622 0005634 0005730 0005847 0016607 0000166 0003676 0003723 0003730 0004652 0005515 0005524 0008270 0016740 0016779 0019899 0046872 0050265	ENSMUSG00000071645(75,ortholog_one2one)		K04F10.6(8,ortholog_many2many); F59A3.9(9,ortholog_many2many)	ENSG00000107951(17,within_species_paralog); ENSG00000134744(14,within_species_paralog); ENSG00000083223(14,within_species_paralog); ENSG00000164329(8,within_species_paralog)
SAFB2_HUMAN	SAFB2	1	409-478	NULL	PF00076 PF02037	0006355 0005634 0005737 0000166 0003676 0003677 0003723 0005515	ENSMUSG00000042625(73,ortholog_one2one)	FBgn0039229(14,ortholog_one2many)	C16C10.6(3,ortholog_one2many)	ENSG00000160633(70,within_species_paralog); ENSG00000137776(32,within_species_paralog); ENSG00000126653(5,within_species_paralog); ENSG00000159450(6,within_species_paralog); ENSG00000123200(14,within_species_paralog); ENSG00000107581(6,within_species_paralog)
RBM4_HUMAN	RBM4	2	4-64, 81-141	42	PF00076 PF00098	0000381 0006396 0006397 0008380 0017148 0030154 0031047 0032055 0032922 0033554 0035278 0043153 0045947 0046822 0051149 0051403 0005634 0005654 0005730 0005737 0010494 0016607 0000166 0003676 0003723 0003729 0003730 0005515 0008270 0035198 0046872		FBgn0011640(31,ortholog_one2many)	ZK863.7(16,ortholog_one2many)	ENSG00000248643(100,within_species_paralog); ENSG00000173914(90,within_species_paralog); ENSG00000239306(27,within_species_paralog)
RFOX3_HUMAN	RBFOX3	1	102-169	NULL	PF12414 PF00076	0006397 0008380 0005622 0005634 0005737 0043025 0000166 0003676 0003677 0003723	ENSMUSG00000025576(96,ortholog_one2one)		ZC404.8(22,ortholog_one2many)	ENSG00000078328(75,within_species_paralog); ENSG00000100320(69,within_species_paralog)
RBMX2_HUMAN	RBMX2	1	38-108	NULL	PF00076	0000166 0003676 0003723	ENSMUSG00000031107(76,apparent_ortholog_one2one)	FBgn0032822(30,ortholog_one2many)	C30B5.4(38,ortholog_one2many)	ENSG00000139168(15,within_species_paralog)
RB15B_HUMAN	RBM15B	2	420-480, 339-408	29	PF00076 PF07744	0000381 0006355 0006397 0008380 0044419 0005634 0005654 0000166 0003676 0003723 0005488 0005515	ENSMUSG00000045365(96,ortholog_one2one)	FBgn0027548(27,ortholog_one2many)	F29C4.7(17,ortholog_one2many)	ENSG00000162775(44,within_species_paralog); ENSG00000065526(21,within_species_paralog)
ELAV4_HUMAN	ELAVL4	3	48-118, 299-368, 134-200	31 38 28	PF00076	0006396 0006397 0000166 0003676 0003723 0003730 0017091	ENSMUSG00000028546(95,ortholog_one2one)	FBgn0010263(56,ortholog_many2many); FBgn0086675(54,ortholog_many2many); FBgn0260400(50,ortholog_many2many)	F35H8.5(50,ortholog_one2many)	ENSG00000196361(78,within_species_paralog); ENSG00000107105(85,within_species_paralog); ENSG00000066044(62,within_species_paralog); ENSG00000184388(6,other_paralog); ENSG00000153250(20,other_paralog); ENSG00000090621(17,other_paralog); ENSG00000101104(18,other_paralog); ENSG00000186288(6,other_paralog); ENSG00000144642(22,other_paralog); ENSG00000070756(17,other_paralog); ENSG00000076067(20,other…
ELAV1_HUMAN	ELAVL1	3	22-92, 246-314, 108-174	33 29 28	PF00076	0007275 0016070 0016071 0048255 0070935 0005654 0005737 0005829 0000166 0003676 0003723 0003729 0005515 0005634 0003730	ENSMUSG00000040028(98,ortholog_one2one)	FBgn0010263(61,ortholog_many2many); FBgn0086675(60,ortholog_many2many); FBgn0260400(54,ortholog_many2many)	F35H8.5(53,ortholog_one2many)	ENSG00000162374(73,within_species_paralog); ENSG00000196361(70,within_species_paralog); ENSG00000107105(73,within_species_paralog); ENSG00000184388(8,other_paralog); ENSG00000153250(21,other_paralog); ENSG00000090621(20,other_paralog); ENSG00000101104(22,other_paralog); ENSG00000186288(8,other_paralog); ENSG00000144642(22,other_paralog); ENSG00000070756(21,other_paralog); ENSG00000076067(21,other…
RALY_HUMAN	RALY	1	23-85	NULL	PF00076	0000398 0008380 0005634 0030530 0071013 0000166 0003676 0003723	ENSMUSG00000027593(87,ortholog_one2one)	FBgn0259935(16,ortholog_one2many)		ENSG00000184672(52,within_species_paralog); ENSG00000092199(41,within_species_paralog); ENSG00000179172(38,within_species_paralog)
SRSF3_HUMAN	SRSF3	1	12-77	NULL	PF00076	0000398 0006366 0006369 0006406 0008380 0010467 0031124 0005634 0005654 0000166 0003676 0003723 0005515	ENSMUSG00000071172(100,ortholog_one2many); ENSMUSG00000078134(96,ortholog_one2many)	FBgn0028554(52,ortholog_one2one)	C33H5.12(45,ortholog_one2many)	ENSG00000115875(55,within_species_paralog); ENSG00000161547(35,within_species_paralog); ENSG00000215699(35,within_species_paralog); ENSG00000188529(35,within_species_paralog); ENSG00000154548(34,within_species_paralog); ENSG00000124193(33,other_paralog); ENSG00000100650(32,other_paralog); ENSG00000111786(22,other_paralog); ENSG00000116350(35,other_paralog); ENSG00000136450(26,other_paralog)
RBM10_HUMAN	RBM10	1	132-194	NULL	PF01585 PF00076 PF00641	0006397 0008150 0008380 0005622 0005634 0016585 0000166 0003676 0003723 0008270 0046872	ENSMUSG00000031060(96,ortholog_one2one)	FBgn0031318(28,ortholog_one2many)	T08B2.5(21,ortholog_one2many)	ENSG00000003756(48,within_species_paralog); ENSG00000004534(24,within_species_paralog)
HNRLL_HUMAN	HNRPLL	2	80-128, 180-230	20	PF00076	0006397 0005634 0003676 0003723	ENSMUSG00000024095(96,ortholog_one2one)	FBgn0003435(30,ortholog_one2many)	C44B7.2(31,ortholog_one2many)	ENSG00000104824(53,within_species_paralog); ENSG00000011304(23,within_species_paralog); ENSG00000117569(23,within_species_paralog); ENSG00000119314(23,within_species_paralog)
SF3B4_HUMAN	SF3B4	2	102-173, 15-85	35	PF00076	0000375 0000398 0006397 0008380 0010467 0005634 0005654 0005681 0005689 0000166 0003676 0003723	ENSMUSG00000068856(100,ortholog_one2many); ENSMUSG00000075609(99,ortholog_one2many)	FBgn0015818(54,ortholog_one2one)	C08B11.5(56,ortholog_one2one)	ENSG00000168175(9,within_species_paralog); ENSG00000111605(15,within_species_paralog); ENSG00000149532(11,within_species_paralog); ENSG00000104897(12,within_species_paralog)
SLTM_HUMAN	SLTM	1	386-455	NULL	PF00076 PF02037	0006355 0006915 0005634 0000166 0003676 0003723	ENSMUSG00000032212(91,ortholog_one2one)	FBgn0039229(12,ortholog_one2many)	C16C10.6(2,ortholog_one2many)	ENSG00000160633(29,within_species_paralog); ENSG00000130254(29,within_species_paralog); ENSG00000126653(4,within_species_paralog); ENSG00000159450(5,within_species_paralog); ENSG00000123200(13,within_species_paralog); ENSG00000107581(5,within_species_paralog)
CSTFT_HUMAN	CSTF2T	1	18-88	NULL	PF00076	0006397 0005622 0005634 0000166 0003676 0003723	ENSMUSG00000053536(91,ortholog_one2one)	FBgn0027841(37,ortholog_one2many)	F56A8.6(25,ortholog_one2many)	ENSG00000101811(69,within_species_paralog); ENSG00000131795(7,within_species_paralog)
RBPS2_HUMAN	RBPMS2	1	33-94	NULL	PF00076	0000166 0003676	ENSMUSG00000032387(86,ortholog_one2one)	FBgn0000363(39,ortholog_one2many)	F46A9.6(38,ortholog_one2many)	ENSG00000157110(60,within_species_paralog)
RBPMS_HUMAN	RBPMS	1	26-87	NULL	PF00076	0006355 0006396 0010862 0060391 0005634 0005737 0000166 0003676 0003713 0003723 0005515 0008143	ENSMUSG00000031586(100,ortholog_one2one)	FBgn0000363(37,ortholog_one2many)	F46A9.6(37,ortholog_one2many)	ENSG00000166831(58,within_species_paralog)
UHMK1_HUMAN	UHMK1	1	345-398	NULL	PF00069 PF07714 PF00076	0006468 0007050 0018105 0031175 0045948 0046777 0046825 0005634 0005737 0030424 0032839 0071598 0000166 0003676 0003723 0004672 0004674 0004713 0005515 0005524 0016740 0043021	ENSMUSG00000026667(99,ortholog_one2one)	FBgn0034834(19,ortholog_one2one)	Y92C3B.2(19,ortholog_one2many)	ENSG00000063244(22,within_species_paralog)
HNRCL_HUMAN	HNRNPCL1	1	18-79	NULL	PF00076	0005634 0030529 0000166 0003676 0003723		FBgn0259935(16,ortholog_one2many)		ENSG00000092199(91,within_species_paralog); ENSG00000125970(40,within_species_paralog); ENSG00000184672(44,within_species_paralog)
RMXL3_HUMAN	RBMXL3	1	10-79	NULL	PF00076	0000166 0003676 0003723	ENSMUSG00000073894(22,ortholog_one2many)	FBgn0003742(4,ortholog_one2many)	C18D11.4(5,ortholog_one2many)	ENSG00000170748(24,within_species_paralog); ENSG00000147274(20,within_species_paralog); ENSG00000213516(19,within_species_paralog); ENSG00000244395(14,within_species_paralog); ENSG00000242389(14,within_species_paralog); ENSG00000242875(14,within_species_paralog); ENSG00000234414(14,within_species_paralog); ENSG00000226941(14,within_species_paralog); ENSG00000169800(14,within_species_paralog); ENS…
NONO_HUMAN	NONO	2	150-210, 76-140	14	PF00076 PF08075	0006281 0006310 0006355 0006397 0008380 0005634 0016363 0042382 0000166 0003676 0003677 0003723 0005515 0042802	ENSMUSG00000031311(99,apparent_ortholog_one2one)	FBgn0004227(34,ortholog_many2many); FBgn0015520(31,ortholog_many2many)	F25B5.7(31,ortholog_one2many)	ENSG00000121390(59,within_species_paralog); ENSG00000116560(56,within_species_paralog)
E7EX17_HUMAN	E7EX17	1	99-167	NULL	PF00076	0003676
B4E312_HUMAN	B4E312	1	39-117	NULL	PF00076 PF00641	0003676 0005622 0008270
B4DMJ1_HUMAN	B4DMJ1	1	18-80	NULL	PF00076	0003676
Q4W5M7_HUMAN	Q4W5M7	1	679-739	NULL	PF00076	0003676
Q6IA98_HUMAN	Q6IA98	2	152-217, 249-318	19	PF00076	0003676
B4DDC7_HUMAN	B4DDC7	1	131-193	NULL	PF00076	0003676
Q5T760_HUMAN	Q5T760	1	37-101	NULL	PF00076	0003676
C9JAB2_HUMAN	C9JAB2	1	13-77	NULL	PF00076	0003676
Q05BU6_HUMAN	Q05BU6	1	37-102	NULL	PF00076	0003676
Q49AS9_HUMAN	Q49AS9	2	2-46, 84-148	26	PF00076	0003676
Q5QP71_HUMAN	Q5QP71	1	429-490	NULL	PF00076	0003676
B4DQI6_HUMAN	B4DQI6	1	22-90	NULL	PF00076	0003676
B7ZLP6_HUMAN	B7ZLP6	1	409-477	NULL	PF00076 PF02037	0003676
B4E2U5_HUMAN	B4E2U5	3	385-454, 2-67, 92-157	22 25 34	PF00076	0003676
D6RF44_HUMAN	D6RF44	1	2-69	NULL	PF00076	0003676
F5H1L1_HUMAN	F5H1L1	1	304-372	NULL	PF00076 PF02037	0003676
Q53FG6_HUMAN	Q53FG6	2	15-85, 102-173	33	PF00076	0003676
F5H656_HUMAN	F5H656	2	24-88, 98-156	22	PF00076 PF08075	0003676
Q5SZ64_HUMAN	Q5SZ64	1	59-130	NULL	PF00076	0003676
F5H6R1_HUMAN	F5H6R1	1	38-108	NULL	PF00076	0003676
F5H101_HUMAN	F5H101	1	10-79	NULL	PF00076	0003676
Q6ZP53_HUMAN	Q6ZP53	1	183-237	NULL	PF00076 PF02136	0003676 0005622 0006810
Q59ES8_HUMAN	Q59ES8	2	540-607, 106-174	42	PF00076	0003676
E7EWT5_HUMAN	E7EWT5	1	8-70	NULL	PF00076	0003676
A8MY68_HUMAN	A8MY68	1	32-88	NULL	PF00076 PF04098	0003676 0006281 0006310
E9PCZ6_HUMAN	E9PCZ6	1	146-211	NULL	PF00076	0003676
B7Z1U7_HUMAN	B7Z1U7	1	163-230	NULL	PF00076	0003676
B4DTA2_HUMAN	B4DTA2	2	2-69, 86-147	40	PF00076	0003676
Q5JRI3_HUMAN	Q5JRI3	1	12-81	NULL	PF00076	0003676
Q53TM1_HUMAN	Q53TM1	1	21-87	NULL	PF00076	0003676
B4DWI8_HUMAN	B4DWI8	2	24-88, 98-156	22	PF08075 PF00076	0003676
B4DUN1_HUMAN	B4DUN1	1	239-293	NULL	PF00076	0003676
B5BUD8_HUMAN	B5BUD8	1	6-67	NULL	PF00076	0003676
B4DSS8_HUMAN	B4DSS8	3	194-258, 475-535, 356-421	26 24 16	PF00076	0003676
B3KY61_HUMAN	B3KY61	1	561-612	NULL	PF00642 PF01480 PF00076	0003676 0008270 0006397
A4D2F7_HUMAN	A4D2F7	1	18-86	NULL	PF00076	0003676
B4DSJ1_HUMAN	B4DSJ1	1	23-85	NULL	PF00076	0003676
B4DEH8_HUMAN	B4DEH8	1	46-115	NULL	PF00076	0003676
Q5T9T9_HUMAN	Q5T9T9	1	10-80	NULL	PF00076	0003676
Q5CZ65_HUMAN	Q5CZ65	1	9-73	NULL	PF00076	0003676
B5BU08_HUMAN	B5BU08	1	91-141	NULL	PF00642 PF00076	0003676 0008270
E9PFS2_HUMAN	E9PFS2	1	47-116	NULL	PF00076	0003676
B7ZW38_HUMAN	B7ZW38	1	18-79	NULL	PF00076	0003676
Q6AI50_HUMAN	Q6AI50	1	10-79	NULL	PF00076	0003676
B4DSU5_HUMAN	B4DSU5	3	191-255, 467-527, 348-413	26 24 16	PF00076	0003676
B1ALY6_HUMAN	B1ALY6	3	384-444, 89-153, 265-331	22 18 24	PF00076	0003676
Q32P45_HUMAN	Q32P45	1	342-396	NULL	PF02136 PF00076	0005622 0006810 0003676
F2Z2U1_HUMAN	F2Z2U1	1	10-73	NULL	PF00076	0003676
E7ENA6_HUMAN	E7ENA6	1	42-98	NULL	PF00076	0003676
B2RA86_HUMAN	B2RA86	3	129-193, 426-495, 38-106	30 33 21	PF00076	0003676
D6REZ6_HUMAN	D6REZ6	1	73-137	NULL	PF00076	0003676
B4DT28_HUMAN	B4DT28	3	28-92, 204-265, 109-170	25 22 22	PF00076	0003676
B4DFT9_HUMAN	B4DFT9	1	16-83	NULL	PF00076	0003676
B7Z4C2_HUMAN	B7Z4C2	2	2-51, 61-121	6	PF08075 PF00076	0003676
D6RBS9_HUMAN	D6RBS9	2	73-137, 153-214	29	PF00076	0003676
C9J2Z9_HUMAN	C9J2Z9	1	101-165	NULL	PF00076	0003676
E9PC62_HUMAN	E9PC62	3	141-205, 438-507, 50-118	30 33 21	PF00076	0003676
Q6P392_HUMAN	Q6P392	1	242-312	NULL	PF00160 PF00076	0006457 0003755 0003676
D6RIT2_HUMAN	D6RIT2	1	15-82	NULL	PF08080 PF00076	0003676
Q6NTA2_HUMAN	Q6NTA2	2	89-138, 187-240	26	PF00076	0003676
B4DT00_HUMAN	B4DT00	3	110-174, 401-470, 19-87	30 33 21	PF00076	0003676
B7Z5E0_HUMAN	B7Z5E0	3	14-84, 251-320, 100-166	31 38 28	PF00076	0003676
C9JGD3_HUMAN	C9JGD3	3	216-279, 121-182, 41-107	24 20 22	PF00076	0003676
B7Z2F6_HUMAN	B7Z2F6	1	252-320	NULL	PF00076	0003676
C9JBI6_HUMAN	C9JBI6	1	679-730	NULL	PF00076	0003676
B4DDB6_HUMAN	B4DDB6	2	15-83, 106-174	34	PF00076	0003676
B0QYK1_HUMAN	B0QYK1	1	307-385	NULL	PF00641 PF00076	0005622 0008270 0003676
A8K6V7_HUMAN	A8K6V7	1	300-357	NULL	PF02136 PF00076	0005622 0006810 0003676
B1ANR1_HUMAN	B1ANR1	1	13-83	NULL	PF00076	0003676
Q2TSD2_HUMAN	Q2TSD2	3	99-169, 11-79, 207-271	27 33 35	PF00076	0003676
E5RFU5_HUMAN	E5RFU5	2	79-139, 158-222	27	PF00076	0003676
C9IZZ3_HUMAN	C9IZZ3	1	368-437	NULL	PF00076 PF02037	0003676
C9JTN7_HUMAN	C9JTN7	2	97-167, 9-77	27	PF00076	0003676
A4D2F6_HUMAN	A4D2F6	1	274-342	NULL	PF00076	0003676
Q5QP20_HUMAN	Q5QP20	1	27-92	NULL	PF00076	0003676
B4DZH7_HUMAN	B4DZH7	1	259-310	NULL	PF00076	0003676
E9PQU5_HUMAN	E9PQU5	1	89-157	NULL	PF00076	0003676
B7Z5X3_HUMAN	B7Z5X3	1	316-384	NULL	PF00076	0003676
A8K8A6_HUMAN	A8K8A6	1	10-80	NULL	PF00076 PF08081	0003676
B4DZ74_HUMAN	B4DZ74	1	10-65	NULL	PF00076 PF04098	0003676 0006281 0006310
B3KME7_HUMAN	B3KME7	3	384-444, 89-153, 265-331	22 18 24	PF00076	0003676
Q53GL6_HUMAN	Q53GL6	1	23-85	NULL	PF00076	0003676
A6NJK7_HUMAN	A6NJK7	1	10-79	NULL	PF00076	0003676
E9PHU9_HUMAN	E9PHU9	1	269-338	NULL	PF00076	0003676
C9JGE3_HUMAN	C9JGE3	1	290-368	NULL	PF00641 PF00076	0005622 0008270 0003676
B4DK81_HUMAN	B4DK81	1	276-348	NULL	PF00076	0003676
B3KP14_HUMAN	B3KP14	3	88-152, 337-399, 186-251	28 35 46	PF00076	0003676
B4E3T4_HUMAN	B4E3T4	1	26-87	NULL	PF00076	0003676
B4DJ90_HUMAN	B4DJ90	2	284-342, 63-131	37	PF00076	0003676
Q6IPF2_HUMAN	Q6IPF2	2	107-175, 16-84	33	PF00076 PF11627	0003676
E5RGH4_HUMAN	E5RGH4	1	38-95	NULL	PF00076	0003676
F5GZU3_HUMAN	F5GZU3	1	239-307	NULL	PF00076	0003676
B7Z7Q9_HUMAN	B7Z7Q9	1	42-98	NULL	PF00076	0003676
B4DZW4_HUMAN	B4DZW4	3	251-318, 56-123, 148-216	41 50 47	PF00658 PF00076	0003723 0003676
B4DRW3_HUMAN	B4DRW3	2	109-157, 22-87	30	PF00076	0003676
B4DVF8_HUMAN	B4DVF8	1	71-124	NULL	PF00076	0003676
B7Z6E0_HUMAN	B7Z6E0	1	5-73	NULL	PF00076	0003676
A6NLN1_HUMAN	A6NLN1	2	13-71, 124-184	27	PF00076	0003676
B4DSC7_HUMAN	B4DSC7	2	97-143, 9-76	40	PF00076	0003676
E7ETU5_HUMAN	E7ETU5	2	31-91, 110-174	27	PF00076	0003676
B3KWE6_HUMAN	B3KWE6	2	7-59, 259-328	28	PF00076	0003676
E9PM61_HUMAN	E9PM61	2	4-64, 81-138	46	PF00076	0003676
B6RF28_HUMAN	B6RF28	1	149-218	NULL	PF00076	0003676
Q9C059_HUMAN	Q9C059	1	37-99	NULL	PF00076	0003676
E7EU98_HUMAN	E7EU98	1	42-98	NULL	PF00076	0003676
B4DTC3_HUMAN	B4DTC3	2	48-115, 132-191	46	PF00076 PF08143	0003676
B7Z4L7_HUMAN	B7Z4L7	2	6-63, 95-165	20	PF00076	0003676
A8KAI7_HUMAN	A8KAI7	1	13-70	NULL	PF00076	0003676
B4DMB1_HUMAN	B4DMB1	3	129-193, 305-366, 210-271	25 22 22	PF00076	0003676
E7EN82_HUMAN	E7EN82	1	42-98	NULL	PF00076	0003676
E7ETR3_HUMAN	E7ETR3	1	42-98	NULL	PF00076	0003676
E1P603_HUMAN	E1P603	1	13-70	NULL	PF00076	0003676
Q13344_HUMAN	Q13344	1	290-368	NULL	PF00641 PF00076	0005622 0008270 0003676
E7EWR4_HUMAN	E7EWR4	1	18-88	NULL	PF00076	0003676
E7EQV3_HUMAN	E7EQV3	3	56-123, 251-318, 148-216	41 47 51	PF00658 PF00076	0003723 0003676
B4DJM2_HUMAN	B4DJM2	1	42-112	NULL	PF00076	0003676
F5GYZ3_HUMAN	F5GYZ3	2	2-51, 61-121	6	PF08075 PF00076	0003676
B4DMD1_HUMAN	B4DMD1	2	88-149, 183-244	22	PF00076	0003676
D6RDL0_HUMAN	D6RDL0	1	14-82	NULL	PF00076	0003676
Q53XX5_HUMAN	Q53XX5	1	8-78	NULL	PF00076	0003676
B4DHA8_HUMAN	B4DHA8	2	143-205, 56-123	41	PF00076	0003676
F5H669_HUMAN	F5H669	1	84-155	NULL	PF00076	0003676
B2RDQ3_HUMAN	B2RDQ3	1	122-190	NULL	PF00076	0003676
D6RAM1_HUMAN	D6RAM1	1	15-82	NULL	PF00076	0003676
F5GXV1_HUMAN	F5GXV1	1	10-57	NULL	PF00076	0003676
B4DRS4_HUMAN	B4DRS4	2	289-343, 135-212	5	PF00076	0003676
B4DI28_HUMAN	B4DI28	1	152-216	NULL	PF00076	0003676
Q32Q83_HUMAN	Q32Q83	1	242-312	NULL	PF00160 PF00076	0006457 0003755 0003676
E9PAU2_HUMAN	E9PAU2	2	78-140, 152-220	25	PF00076	0003676
D6RJ04_HUMAN	D6RJ04	1	15-82	NULL	PF00076	0003676
Q8TER1_HUMAN	Q8TER1	1	73-136	NULL	PF00076	0003676
E7EVG6_HUMAN	E7EVG6	1	1281-1340	NULL	PF00076	0003676
E7ETC0_HUMAN	E7ETC0	1	11-79	NULL	PF00076	0003676
D3DU92_HUMAN	D3DU92	1	165-234	NULL	PF00076	0003676
B4DJP9_HUMAN	B4DJP9	1	12-81	NULL	PF00076	0003676
Q96G38_HUMAN	Q96G38	1	16-66	NULL	PF08662 PF00076	0003676
Q5HYB4_HUMAN	Q5HYB4	1	62-128	NULL	PF00076	0003676
A8K644_HUMAN	A8K644	2	106-171, 4-64	22	PF00076	0003676
D6R9T0_HUMAN	D6R9T0	1	15-82	NULL	PF00076	0003676
Q9Y6G0_HUMAN	Q9Y6G0	1	38-108	NULL	PF00076	0003676
E9PBY2_HUMAN	E9PBY2	1	42-98	NULL	PF00076	0003676
B4DN17_HUMAN	B4DN17	1	307-371	NULL	PF01812 PF00076	0005524 0009396 0030272 0003676
B4DHS3_HUMAN	B4DHS3	2	2-46, 84-148	24	PF00076	0003676
E5RG67_HUMAN	E5RG67	1	9-77	NULL	PF00076	0003676
Q59EQ8_HUMAN	Q59EQ8	1	18-87	NULL	PF00076	0003676
B4DMY3_HUMAN	B4DMY3	2	64-131, 147-215	39	PF00076 PF08143	0003676
E5RFD8_HUMAN	E5RFD8	1	13-60	NULL	PF00076	0003676
Q75MU1_HUMAN	Q75MU1	1	45-112	NULL	PF00076	0003676
B4DPK8_HUMAN	B4DPK8	2	34-83, 132-185	26	PF00076	0003676
B3KXC1_HUMAN	B3KXC1	1	135-196	NULL	PF00076	0003676
Q68DG4_HUMAN	Q68DG4	1	115-177	NULL	PF08080 PF00076	0003676
F5H532_HUMAN	F5H532	1	10-80	NULL	PF00076	0003676
B2RXH8_HUMAN	B2RXH8	1	18-77	NULL	PF00076	0003676
B7Z2Z1_HUMAN	B7Z2Z1	1	304-372	NULL	PF00076 PF02037	0003676
B4DVB8_HUMAN	B4DVB8	3	49-119, 273-341, 135-201	33 29 28	PF00076	0003676
A8K3M9_HUMAN	A8K3M9	2	16-83, 113-174	16	PF00076	0003676
B4DHY1_HUMAN	B4DHY1	1	91-154	NULL	PF00076	0003676
C9JQN2_HUMAN	C9JQN2	1	50-105	NULL	PF09004 PF00076	0016706 0008168 0055114 0003676
Q9BQ02_HUMAN	Q9BQ02	2	346-412, 260-326	38	PF00076	0003676
D6RFF0_HUMAN	D6RFF0	1	127-188	NULL	PF05383 PF00076	0003676
B4DR70_HUMAN	B4DR70	1	216-294	NULL	PF00641 PF00076	0005622 0008270 0003676
D6RF41_HUMAN	D6RF41	1	63-126	NULL	PF00076	0003676
E9PSH0_HUMAN	E9PSH0	1	19-84	NULL	PF00076	0003676
C9JPX0_HUMAN	C9JPX0	1	305-374	NULL	PF00076 PF02037	0003676
D6RGD8_HUMAN	D6RGD8	1	3-60	NULL	PF00076	0003676
C9JJZ7_HUMAN	C9JJZ7	1	19-67	NULL	PF00076	0003676
B3KUJ0_HUMAN	B3KUJ0	2	102-173, 15-85	33	PF00076	0003676
B4E241_HUMAN	B4E241	1	12-77	NULL	PF00076	0003676
Q59G45_HUMAN	Q59G45	2	358-427, 73-137	30	PF00076	0003676
F5H6R6_HUMAN	F5H6R6	1	30-90	NULL	PF00076	0003676
B7Z6T4_HUMAN	B7Z6T4	1	269-320	NULL	PF00076	0003676
F5GWQ7_HUMAN	F5GWQ7	1	39-117	NULL	PF00076 PF00641	0003676 0005622 0008270
F5GXV8_HUMAN	F5GXV8	1	12-81	NULL	PF00076	0003676
B4E1E3_HUMAN	B4E1E3	3	226-289, 131-192, 51-117	24 20 22	PF00076	0003676
E9PFH8_HUMAN	E9PFH8	1	113-178	NULL	PF08777 PF05383 PF00076	0003676
E7EPC9_HUMAN	E7EPC9	1	99-167	NULL	PF00076	0003676
B4DHE8_HUMAN	B4DHE8	2	2-69, 90-156	44	PF00076	0003676
Q53F64_HUMAN	Q53F64	2	73-140, 156-224	39	PF08143 PF00076	0003676
E5RI26_HUMAN	E5RI26	1	13-73	NULL	PF00076	0003676
E7ERQ6_HUMAN	E7ERQ6	1	42-98	NULL	PF00076	0003676
E7EN40_HUMAN	E7EN40	1	15-82	NULL	PF00076	0003676
C9JIJ9_HUMAN	C9JIJ9	2	62-122, 141-205	27	PF00076	0003676
B4DM91_HUMAN	B4DM91	1	10-79	NULL	PF00076	0003676
D6RFJ8_HUMAN	D6RFJ8	1	275-332	NULL	PF02136 PF00076	0005622 0006810 0003676
B1APY8_HUMAN	B1APY8	3	53-123, 304-373, 139-205	31 38 28	PF00076	0003676
A8K5C4_HUMAN	A8K5C4	3	11-79, 99-169, 207-271	26 35 32	PF00076	0003676
F5H659_HUMAN	F5H659	1	771-832	NULL	PF00076	0003676
Q6ZS99_HUMAN	Q6ZS99	4	467-533, 202-270, 381-447, 291-352	28 38 35 11 14 41	PF00076	0003676
O95652_HUMAN	O95652	1	43-87	NULL	PF00076	0003676
B2R603_HUMAN	B2R603	1	18-80	NULL	PF00076	0003676
F5H357_HUMAN	F5H357	1	26-87	NULL	PF00076	0003676
B4DM75_HUMAN	B4DM75	4	76-143, 272-340, 169-237, 2-56	36 32 18 39 18 27	PF00076	0003676
Q59FM6_HUMAN	Q59FM6	1	222-291	NULL	PF00076	0003676
E9PQ56_HUMAN	E9PQ56	2	113-183, 210-279	41	PF00076	0003676
B1ALY5_HUMAN	B1ALY5	3	451-511, 156-220, 332-398	22 18 24	PF00076	0003676
B3V096_HUMAN	B3V096	1	18-88	NULL	PF00076	0003676
Q7Z3W9_HUMAN	Q7Z3W9	1	61-111	NULL	PF00076	0003676
B7ZMC0_HUMAN	B7ZMC0	1	10-79	NULL	PF08081 PF00076	0003676
A6NEW5_HUMAN	A6NEW5	1	101-168	NULL	PF00076	0003676
C9JLZ0_HUMAN	C9JLZ0	1	495-558	NULL	PF04818 PF00076	0003676
B4DZ07_HUMAN	B4DZ07	1	2-49	NULL	PF00076	0003676
F5H0M7_HUMAN	F5H0M7	1	145-209	NULL	PF00076	0003676
B3KTP9_HUMAN	B3KTP9	4	497-563, 232-300, 321-382, 411-477	28 35 38 14 11 43	PF00076	0003676
B1APY9_HUMAN	B1APY9	3	53-123, 290-359, 139-205	31 38 28	PF00076	0003676
E7EU39_HUMAN	E7EU39	1	42-98	NULL	PF00076	0003676
B2RUT9_HUMAN	B2RUT9	1	10-79	NULL	PF08081 PF00076	0003676
C9J286_HUMAN	C9J286	1	84-143	NULL	PF00076	0003676
D6RIU0_HUMAN	D6RIU0	2	15-82, 115-168	38	PF00076	0003676
Q0VGM7_HUMAN	Q0VGM7	1	38-108	NULL	PF00076	0003676
A8K1C9_HUMAN	A8K1C9	2	421-495, 29-95	25	PF00076	0003676
D6RFL5_HUMAN	D6RFL5	1	73-136	NULL	PF00076	0003676
B4DXN6_HUMAN	B4DXN6	1	54-104	NULL	PF08662 PF00076	0003676
E9PFP2_HUMAN	E9PFP2	2	289-343, 135-212	5	PF00076	0003676
B9ZVT1_HUMAN	B9ZVT1	2	402-470, 288-353	12	PF00076	0003676
Q6PJB9_HUMAN	Q6PJB9	1	37-101	NULL	PF00076	0003676
B4DFK9_HUMAN	B4DFK9	2	15-82, 248-310	33	PF08080 PF00076	0003676
B4DSI2_HUMAN	B4DSI2	2	131-191, 12-77	16	PF00076	0003676
D6RFM3_HUMAN	D6RFM3	2	115-163, 15-82	42	PF00076	0003676
A8K583_HUMAN	A8K583	1	679-730	NULL	PF00076	0003676
Q5QP21_HUMAN	Q5QP21	1	133-198	NULL	PF00076	0003676
B7Z1C7_HUMAN	B7Z1C7	1	208-275	NULL	PF00076	0003676
B4DM66_HUMAN	B4DM66	1	231-300	NULL	PF00076	0003676
B7Z5B6_HUMAN	B7Z5B6	1	340-408	NULL	PF00076 PF02037	0003676
Q701P4_HUMAN	Q701P4	1	91-141	NULL	PF00642 PF00076	0003676 0008270
B4DSZ2_HUMAN	B4DSZ2	1	19-87	NULL	PF00076	0003676
B4E2A3_HUMAN	B4E2A3	1	8-70	NULL	PF00076	0003676
B3KSX3_HUMAN	B3KSX3	1	23-85	NULL	PF00076	0003676
Q68DD9_HUMAN	Q68DD9	2	138-203, 235-305	19	PF00076	0003676
Q5VVE3_HUMAN	Q5VVE3	1	298-365	NULL	PF00076	0003676
Q53HH4_HUMAN	Q53HH4	1	342-396	NULL	PF02136 PF00076	0005622 0006810 0003676
B3KVY2_HUMAN	B3KVY2	1	18-86	NULL	PF00076	0003676
B0QYK0_HUMAN	B0QYK0	1	325-403	NULL	PF00641 PF00076	0005622 0008270 0003676
B4E187_HUMAN	B4E187	1	258-309	NULL	PF00076	0003676
D6R9K7_HUMAN	D6R9K7	2	81-138, 4-64	43	PF00076	0003676
B4DU52_HUMAN	B4DU52	1	196-254	NULL	PF00076	0003676
B4DRM3_HUMAN	B4DRM3	1	99-167	NULL	PF00076	0003676
A8K5K5_HUMAN	A8K5K5	1	241-303	NULL	PF12353 PF00076	0003676
B4DDE7_HUMAN	B4DDE7	3	118-182, 413-482, 27-95	30 33 21	PF00076	0003676
D6RIH9_HUMAN	D6RIH9	1	15-82	NULL	PF00076	0003676
Q59HD3_HUMAN	Q59HD3	1	161-228	NULL	PF00076	0003676
C9JE21_HUMAN	C9JE21	1	150-204	NULL	PF00076	0003676
Q05DU0_HUMAN	Q05DU0	1	38-108	NULL	PF00076	0003676
Q53GD7_HUMAN	Q53GD7	1	12-81	NULL	PF00076	0003676
B7ZKM0_HUMAN	B7ZKM0	2	670-738, 767-835	27	PF00076 PF05391	0003676
E7EU28_HUMAN	E7EU28	2	145-210, 242-311	19	PF00076	0003676
A4D210_HUMAN	A4D210	1	168-218	NULL	PF08662 PF00076	0003676
Q59H49_HUMAN	Q59H49	1	203-267	NULL	PF00076	0003676
F5H0D8_HUMAN	F5H0D8	1	46-102	NULL	PF00076	0003676
Q0VAC0_HUMAN	Q0VAC0	2	107-175, 16-84	33	PF11627 PF00076	0003676
Q6IBQ5_HUMAN	Q6IBQ5	1	287-365	NULL	PF00641 PF00076	0005622 0008270 0003676
E7ERC4_HUMAN	E7ERC4	1	113-178	NULL	PF05383 PF00076	0003676
D3DPB2_HUMAN	D3DPB2	2	110-174, 31-91	27	PF00076	0003676
Q5H919_HUMAN	Q5H919	1	135-212	NULL	PF00076	0003676
B4E2S3_HUMAN	B4E2S3	2	62-122, 141-205	27	PF00076	0003676
F5GWN9_HUMAN	F5GWN9	1	10-79	NULL	PF00076	0003676
C9J9B2_HUMAN	C9J9B2	2	63-123, 142-206	27	PF00076	0003676
B7Z213_HUMAN	B7Z213	1	34-95	NULL	PF00076	0003676
B7Z974_HUMAN	B7Z974	1	12-76	NULL	PF00076	0003676
Q8NAK9_HUMAN	Q8NAK9	1	18-86	NULL	PF00076	0003676
Q2VIP3_HUMAN	Q2VIP3	4	101-168, 13-83, 296-363, 193-261	32 38 44 29 28 51	PF00658 PF00076	0003723 0003676
Q59GY3_HUMAN	Q59GY3	2	38-98, 146-211	24	PF00076	0003676
A6NIT8_HUMAN	A6NIT8	1	71-124	NULL	PF00076	0003676
F2Z2G3_HUMAN	F2Z2G3	1	35-103	NULL	PF00076	0003676
B7WPG3_HUMAN	B7WPG3	1	80-128	NULL	PF00076	0003676
F5H718_HUMAN	F5H718	1	101-157	NULL	PF00076	0003676
A0PJ47_HUMAN	A0PJ47	1	409-478	NULL	PF00076 PF02037	0003676
Q68DZ9_HUMAN	Q68DZ9	1	110-178	NULL	PF00076	0003676
B7ZM40_HUMAN	B7ZM40	1	865-916	NULL	PF00076	0003676
Q05CK9_HUMAN	Q05CK9	3	200-265, 281-342, 376-437	20 22 19	PF00076	0003676
Q6PKC9_HUMAN	Q6PKC9	1	37-101	NULL	PF00076	0003676
E5RGV0_HUMAN	E5RGV0	1	63-129	NULL	PF00076	0003676
C9J6C5_HUMAN	C9J6C5	1	28-84	NULL	PF00076	0003676
B7Z959_HUMAN	B7Z959	1	159-227	NULL	PF00076 PF02037	0003676
F5GZT4_HUMAN	F5GZT4	1	23-85	NULL	PF08080 PF00076	0003676
Q6IQ42_HUMAN	Q6IQ42	1	12-58	NULL	PF00076	0003676
B4DIB6_HUMAN	B4DIB6	2	23-87, 320-389	30	PF00076	0003676
A8K4H1_HUMAN	A8K4H1	1	286-364	NULL	PF00641 PF00076	0005622 0008270 0003676
Q9BUQ0_HUMAN	Q9BUQ0	3	365-431, 186-250, 484-544	24 24 24	PF00076	0003676
B3KT61_HUMAN	B3KT61	1	23-85	NULL	PF00076	0003676
C9J9G0_HUMAN	C9J9G0	1	75-123	NULL	PF00076	0003676
B4E3U4_HUMAN	B4E3U4	1	10-74	NULL	PF00076	0003676
B5BUB5_HUMAN	B5BUB5	1	113-178	NULL	PF08777 PF05383 PF00076	0003676
Q86UM1_HUMAN	Q86UM1	1	207-257	NULL	PF00076	0003676
B7Z5Y7_HUMAN	B7Z5Y7	1	58-118	NULL	PF00076	0003676
Q5SZQ6_HUMAN	Q5SZQ6	3	382-451, 15-77, 97-161	20 30 33	PF00076	0003676
Q5QP23_HUMAN	Q5QP23	1	154-219	NULL	PF00076	0003676
D6RDU3_HUMAN	D6RDU3	1	15-82	NULL	PF00076	0003676
Q4VC03_HUMAN	Q4VC03	4	13-83, 296-363, 101-168, 193-261	32 29 34 42 50 45	PF00658 PF00076	0003723 0003676
Q86VW9_HUMAN	Q86VW9	1	366-434	NULL	PF07744 PF00076	0003676
B4DEP6_HUMAN	B4DEP6	1	99-167	NULL	PF00076	0003676
A8K5X9_HUMAN	A8K5X9	5	834-904, 4-72, 732-804, 404-473, 302-362	30 25 24 22 31 28 13 34 19 14	PF00076	0003676
B0LM41_HUMAN	B0LM41	1	3-60	NULL	PF00076 PF00098	0003676 0008270
E7EV40_HUMAN	E7EV40	1	80-146	NULL	PF00076	0003676
B4DJ45_HUMAN	B4DJ45	1	77-125	NULL	PF00076	0003676
Q6ZR81_HUMAN	Q6ZR81	1	8-70	NULL	PF00076	0003676
F5GY08_HUMAN	F5GY08	1	12-81	NULL	PF00076	0003676
Q569H2_HUMAN	Q569H2	1	26-87	NULL	PF00076	0003676
E7EQD1_HUMAN	E7EQD1	1	86-154	NULL	PF00076	0003676
B2RDP1_HUMAN	B2RDP1	2	152-217, 249-318	19	PF00076	0003676
E7EX81_HUMAN	E7EX81	4	466-532, 201-269, 290-351, 380-446	28 35 38 14 11 43	PF00076	0003676
C9JAA9_HUMAN	C9JAA9	1	6-68	NULL	PF00076	0003676
B3KWX7_HUMAN	B3KWX7	2	131-196, 228-298	19	PF00076	0003676
Q65ZQ3_HUMAN	Q65ZQ3	2	128-196, 37-105	30	PF00076	0003676
B5BU25_HUMAN	B5BU25	3	396-455, 151-224, 261-330	11 18 20	PF00076	0003676
E7EQJ0_HUMAN	E7EQJ0	1	15-82	NULL	PF00076	0003676
E7ET38_HUMAN	E7ET38	1	130-187	NULL	PF00076	0003676
B5BTZ8_HUMAN	B5BTZ8	2	153-212, 9-79	25	PF00076	0003676
B7Z8K4_HUMAN	B7Z8K4	1	160-214	NULL	PF00076	0003676
B9EIP3_HUMAN	B9EIP3	1	10-79	NULL	PF08081 PF00076	0003676
A8K4T9_HUMAN	A8K4T9	1	23-85	NULL	PF00076	0003676
Q59G98_HUMAN	Q59G98	3	146-216, 47-115, 295-359	27 33 36	PF00076	0003676
A8KAQ5_HUMAN	A8KAQ5	1	105-174	NULL	PF12220 PF00076	0003676
F5H160_HUMAN	F5H160	1	779-840	NULL	PF00076	0003676
B4DLU6_HUMAN	B4DLU6	1	13-77	NULL	PF00076	0003676
A8K329_HUMAN	A8K329	1	409-477	NULL	PF00076 PF02037	0003676
B4DEM8_HUMAN	B4DEM8	1	4-64	NULL	PF00076	0003676
B3KQH4_HUMAN	B3KQH4	3	68-135, 495-564, 184-249	22 22 22	PF00076	0003676
B1AM48_HUMAN	B1AM48	2	41-111, 127-189	42	PF00076	0003676
B4DWT1_HUMAN	B4DWT1	1	37-102	NULL	PF00076	0003676
Q2VIN3_HUMAN	Q2VIN3	1	10-80	NULL	PF08081 PF00076	0003676
B7Z2D8_HUMAN	B7Z2D8	3	38-102, 287-349, 136-201	28 35 46	PF00076	0003676
A2RRD3_HUMAN	A2RRD3	2	133-198, 230-300	19	PF00076	0003676
E7ERJ4_HUMAN	E7ERJ4	2	15-83, 106-174	34	PF00076	0003676
Q59G49_HUMAN	Q59G49	2	4-48, 86-150	26	PF00076	0003676
B1AM49_HUMAN	B1AM49	3	69-139, 155-221, 306-375	40 31 26	PF00076	0003676
E7EPM3_HUMAN	E7EPM3	1	752-813	NULL	PF00076	0003676
B4DKS8_HUMAN	B4DKS8	2	38-104, 216-279	42	PF08080 PF00076	0003676
B7Z4G7_HUMAN	B7Z4G7	3	51-121, 288-357, 137-203	31 38 28	PF00076	0003676
Q53FN0_HUMAN	Q53FN0	1	18-86	NULL	PF00076	0003676
Q6MZY7_HUMAN	Q6MZY7	2	6-63, 95-165	20	PF00076	0003676
D6R9P3_HUMAN	D6R9P3	2	73-140, 156-224	39	PF00076 PF08143	0003676
D6RBM0_HUMAN	D6RBM0	2	15-82, 115-181	44	PF00076	0003676
B4DZ01_HUMAN	B4DZ01	1	197-266	NULL	PF00076	0003676
A2ABK1_HUMAN	A2ABK1	1	264-318	NULL	PF00076	0003676
C9J1W7_HUMAN	C9J1W7	1	510-573	NULL	PF04818 PF00076	0003676
A8K525_HUMAN	A8K525	2	150-210, 76-140	14	PF08075 PF00076	0003676
Q6FGE0_HUMAN	Q6FGE0	1	6-67	NULL	PF00076	0003676
C9JYS8_HUMAN	C9JYS8	1	76-140	NULL	PF00076 PF08075	0003676
E5RHG7_HUMAN	E5RHG7	1	13-73	NULL	PF00076	0003676
B4E3E6_HUMAN	B4E3E6	2	106-174, 15-83	33	PF00076	0003676
Q5H918_HUMAN	Q5H918	1	135-212	NULL	PF00076	0003676
Q2L7G6_HUMAN	Q2L7G6	3	129-193, 305-366, 210-271	25 22 22	PF00076	0003676
C9JZG1_HUMAN	C9JZG1	1	168-218	NULL	PF00076	0003676
Q59GZ7_HUMAN	Q59GZ7	1	4-61	NULL	PF00658 PF00076	0003723 0003676
Q6PJY9_HUMAN	Q6PJY9	1	37-102	NULL	PF00076	0003676
Q7Z3L0_HUMAN	Q7Z3L0	2	6-63, 95-165	20	PF00076	0003676
B4E0L0_HUMAN	B4E0L0	1	301-361	NULL	PF00076	0003676
B4DG28_HUMAN	B4DG28	2	21-83, 261-330	28	PF00076	0003676
B4DJB6_HUMAN	B4DJB6	3	136-198, 371-440, 48-115	28 39 25	PF00076	0003676
E5RFV3_HUMAN	E5RFV3	1	23-86	NULL	PF00076	0003676
Q14730_HUMAN	Q14730	1	1-66	NULL	PF08777 PF00076	0003676
A4QPE1_HUMAN	A4QPE1	1	158-214	NULL	PF00076	0003676
Q8N220_HUMAN	Q8N220	1	18-78	NULL	PF00076	0003676
C9IZL7_HUMAN	C9IZL7	2	76-140, 150-206	15	PF00076	0003676
B7Z6I4_HUMAN	B7Z6I4	1	130-187	NULL	PF00076	0003676
Q59H57_HUMAN	Q59H57	1	61-139	NULL	PF00641 PF00076	0005622 0008270 0003676
E9PCL7_HUMAN	E9PCL7	1	264-318	NULL	PF00076	0003676
E9PEG6_HUMAN	E9PEG6	1	2-48	NULL	PF00076	0003676
A8MXT5_HUMAN	A8MXT5	1	409-478	NULL	PF00076 PF02037	0003676
Q3S611_HUMAN	Q3S611	1	8-78	NULL	PF00160 PF00076	0006457 0003755 0003676
Q0P607_HUMAN	Q0P607	1	510-573	NULL	PF04818 PF00076	0003676
B3KUF7_HUMAN	B3KUF7	1	18-73	NULL	PF00076	0003676
A8K4L9_HUMAN	A8K4L9	3	11-96, 116-186, 224-288	26 35 33	PF00076	0003676
F5GYA8_HUMAN	F5GYA8	1	2-49	NULL	PF00076	0003676
Q71RF1_HUMAN	Q71RF1	1	18-68	NULL	PF00076 PF00642	0003676 0008270
B4E2X2_HUMAN	B4E2X2	1	8-78	NULL	PF00076	0003676
Q86X94_HUMAN	Q86X94	1	236-314	NULL	PF00076 PF00641	0003676 0005622 0008270
E9PAM1_HUMAN	E9PAM1	1	308-372	NULL	PF01812 PF00076	0005524 0009396 0030272 0003676
F2Z2W2_HUMAN	F2Z2W2	1	3-60	NULL	PF00076	0003676
E7EQS3_HUMAN	E7EQS3	2	4-64, 81-139	44	PF00076	0003676
E9PDD9_HUMAN	E9PDD9	1	196-254	NULL	PF00076	0003676
Q59EF5_HUMAN	Q59EF5	1	31-96	NULL	PF00076	0003676
Q6MZS5_HUMAN	Q6MZS5	3	144-208, 225-289, 323-384	20 25 22	PF00076	0003676
Q53F48_HUMAN	Q53F48	2	20-86, 199-263	41	PF00076	0003676
F5H047_HUMAN	F5H047	1	84-155	NULL	PF00076	0003676
B4E1U0_HUMAN	B4E1U0	2	81-139, 4-64	42	PF00076	0003676
A8K588_HUMAN	A8K588	2	4-64, 112-177	24	PF00076	0003676
B2R802_HUMAN	B2R802	2	210-272, 12-82	14	PF00076	0003676
F5H0R1_HUMAN	F5H0R1	1	96-159	NULL	PF03828 PF00076	0003676
Q8IWE6_HUMAN	Q8IWE6	1	37-101	NULL	PF00076	0003676
B4DZ27_HUMAN	B4DZ27	3	63-126, 143-204, 238-301	25 14 22	PF00076	0003676
B4DRP9_HUMAN	B4DRP9	3	231-298, 658-727, 347-412	22 22 22	PF00076	0003676
D6W592_HUMAN	D6W592	1	80-128	NULL	PF00076	0003676
E7EPF2_HUMAN	E7EPF2	1	31-91	NULL	PF00076	0003676
E9PGX9_HUMAN	E9PGX9	1	62-118	NULL	PF00076	0003676
E7EMJ8_HUMAN	E7EMJ8	2	106-171, 4-64	22	PF00076	0003676
Q5VZZ6_HUMAN	Q5VZZ6	3	110-174, 415-484, 19-87	30 33 21	PF00076	0003676
D6W5H1_HUMAN	D6W5H1	1	679-730	NULL	PF00076	0003676
B3KUY1_HUMAN	B3KUY1	1	6-74	NULL	PF00076	0003676
B2R6F3_HUMAN	B2R6F3	1	12-77	NULL	PF00076	0003676
SRSF8_HUMAN	Q9BRL6	1	18-86	NULL	PF00076	0003676
E9PLB0_HUMAN	E9PLB0	2	81-141, 4-64	44	PF00076	0003676
B3KM80_HUMAN	B3KM80	4	400-466, 135-203, 224-285, 314-380	28 35 38 14 11 43	PF00076	0003676
D3DQM9_HUMAN	D3DQM9	1	486-547	NULL	PF00076	0003676
E5RG71_HUMAN	E5RG71	1	23-84	NULL	PF00076	0003676
B7Z3R7_HUMAN	B7Z3R7	3	124-188, 373-435, 222-287	28 35 46	PF00076	0003676
E5RGH3_HUMAN	E5RGH3	1	56-108	NULL	PF00076	0003676
Q3B867_HUMAN	Q3B867	1	46-113	NULL	PF00076	0003676
Q6IQ30_HUMAN	Q6IQ30	4	13-83, 296-363, 101-168, 193-261	32 29 34 42 50 45	PF00658 PF00076	0003723 0003676
D6R9M7_HUMAN	D6R9M7	1	73-137	NULL	PF00076	0003676
E7EUX0_HUMAN	E7EUX0	1	285-363	NULL	PF00641 PF00076	0005622 0008270 0003676
B7ZLC2_HUMAN	B7ZLC2	1	308-372	NULL	PF01812 PF00076	0005524 0009396 0030272 0003676
Q5QPM2_HUMAN	Q5QPM2	1	23-85	NULL	PF00076	0003676
B4DEG4_HUMAN	B4DEG4	2	74-143, 167-235	31	PF11532 PF00076	0003676
B4DQL3_HUMAN	B4DQL3	1	177-246	NULL	PF00076	0003676
Q1RMF9_HUMAN	Q1RMF9	3	207-263, 372-428, 42-98	100 100 100	PF00076	0003676
B4DJK0_HUMAN	B4DJK0	1	6-67	NULL	PF00076	0003676
B3KRR4_HUMAN	B3KRR4	1	242-312	NULL	PF00160 PF00076	0006457 0003755 0003676
D3DQF6_HUMAN	D3DQF6	1	304-355	NULL	PF00076	0003676
B2R7W4_HUMAN	B2R7W4	3	167-231, 343-404, 248-309	25 22 22	PF00076	0003676
B7ZLP7_HUMAN	B7ZLP7	3	73-137, 153-214, 248-311	29 17 19	PF00076	0003676
E9PN18_HUMAN	E9PN18	1	151-221	NULL	PF00076	0003676
C9JZB7_HUMAN	C9JZB7	1	110-177	NULL	PF00076	0003676
Q2PYN1_HUMAN	Q2PYN1	1	3-60	NULL	PF00076	0003676
C9JT33_HUMAN	C9JT33	1	4-68	NULL	PF00013 PF00076	0003723 0003676
E9PB61_HUMAN	E9PB61	1	115-183	NULL	PF00076	0003676
E9PCY7_HUMAN	E9PCY7	3	15-82, 293-355, 115-181	31 44 41	PF08080 PF00076	0003676
B4DMV6_HUMAN	B4DMV6	1	45-112	NULL	PF00076	0003676
D3DSV0_HUMAN	D3DSV0	1	26-87	NULL	PF00076	0003676
F5H606_HUMAN	F5H606	1	12-81	NULL	PF00076	0003676
A8K9U0_HUMAN	A8K9U0	2	81-141, 4-64	42	PF00076 PF00098	0003676 0008270
Q96DI9_HUMAN	Q96DI9	1	280-340	NULL	PF00076	0003676
B0QYV1_HUMAN	B0QYV1	1	95-162	NULL	PF00076	0003676
F5GXS4_HUMAN	F5GXS4	1	160-229	NULL	PF00076 PF02037	0003676
B4DSM4_HUMAN	B4DSM4	1	47-116	NULL	PF00076	0003676
B2R959_HUMAN	B2R959	2	75-124, 173-226	26	PF00076	0003676
E9PMU7_HUMAN	E9PMU7	1	151-221	NULL	PF00076	0003676
D6R9D6_HUMAN	D6R9D6	3	73-137, 153-214, 248-311	29 17 19	PF00076	0003676
B1ANR7_HUMAN	B1ANR7	1	75-142	NULL	PF00658 PF00076	0003723 0003676
B7Z5F9_HUMAN	B7Z5F9	3	69-133, 318-380, 167-232	28 35 46	PF00076	0003676
E7EWI9_HUMAN	E7EWI9	2	15-83, 106-174	34	PF00076	0003676
B4DMM2_HUMAN	B4DMM2	1	128-185	NULL	PF00076	0003676
D6RD18_HUMAN	D6RD18	2	73-140, 156-224	39	PF00076 PF08143	0003676
Q0VGD6_HUMAN	Q0VGD6	3	141-205, 317-378, 222-283	25 22 22	PF00076	0003676
B4DUD5_HUMAN	B4DUD5	1	18-88	NULL	PF00076	0003676
B7Z888_HUMAN	B7Z888	1	545-610	NULL	PF04818 PF00076	0003676
F5H0I5_HUMAN	F5H0I5	1	10-80	NULL	PF00076	0003676
Q96MX4_HUMAN	Q96MX4	1	368-446	NULL	PF00641 PF00076	0005622 0008270 0003676
Q5JRI1_HUMAN	Q5JRI1	1	12-81	NULL	PF00076	0003676
B3KW50_HUMAN	B3KW50	3	135-199, 384-446, 233-298	28 35 46	PF00076	0003676
B4DGF8_HUMAN	B4DGF8	1	84-155	NULL	PF00076	0003676
Q6PIX2_HUMAN	Q6PIX2	2	374-433, 299-363	16	PF08075 PF00076	0003676
C9JB16_HUMAN	C9JB16	1	1-58	NULL	PF00076	0003676
Q5QPM1_HUMAN	Q5QPM1	1	23-85	NULL	PF00076	0003676
F5H330_HUMAN	F5H330	1	785-836	NULL	PF00076	0003676
Q75MU2_HUMAN	Q75MU2	1	45-112	NULL	PF00076	0003676
A8K894_HUMAN	A8K894	2	75-123, 175-225	20	PF00076	0003676
B4E1M7_HUMAN	B4E1M7	2	146-211, 243-313	19	PF00076	0003676
E5RJM0_HUMAN	E5RJM0	1	449-510	NULL	PF00076	0003676
Q6FI03_HUMAN	Q6FI03	1	342-396	NULL	PF02136 PF00076	0005622 0006810 0003676
B7ZMD9_HUMAN	B7ZMD9	1	10-79	NULL	PF08081 PF00076	0003676
Q6PKH5_HUMAN	Q6PKH5	1	4-66	NULL	PF00076 PF00641	0003676 0005622 0008270
B7Z645_HUMAN	B7Z645	3	66-131, 147-208, 242-303	20 22 19	PF00076	0003676
Q96MN4_HUMAN	Q96MN4	1	307-385	NULL	PF00641 PF00076	0005622 0008270 0003676
B4DRA0_HUMAN	B4DRA0	2	133-198, 230-300	19	PF00076	0003676
Q5VX58_HUMAN	Q5VX58	4	101-168, 13-83, 296-363, 193-261	32 38 44 29 28 51	PF00658 PF00076	0003723 0003676
B2R5W2_HUMAN	B2R5W2	1	18-80	NULL	PF00076	0003676
B4DYX9_HUMAN	B4DYX9	1	276-330	NULL	PF00076	0003676
Q9BSM5_HUMAN	Q9BSM5	2	2-62, 85-153	32	PF00076 PF11627	0003676
A8K1L8_HUMAN	A8K1L8	2	18-85, 123-184	25	PF00076	0003676
Q5VVE2_HUMAN	Q5VVE2	2	78-145, 179-246	14	PF00076	0003676
B4DF29_HUMAN	B4DF29	1	102-169	NULL	PF00076	0003676
Q7KYM9_HUMAN	Q7KYM9	2	495-562, 46-114	42	PF00076	0003676
Q5TGA3_HUMAN	Q5TGA3	1	8-78	NULL	PF00160 PF00076	0006457 0003755 0003676
E7ETM7_HUMAN	E7ETM7	2	183-244, 88-149	22	PF00076	0003676
F5H4Y5_HUMAN	F5H4Y5	1	19-79	NULL	PF00076	0003676
E5RGV5_HUMAN	E5RGV5	1	9-77	NULL	PF00076	0003676
E7ENA5_HUMAN	E7ENA5	1	42-98	NULL	PF00076	0003676
F5H5I6_HUMAN	F5H5I6	3	38-102, 287-349, 136-201	28 35 46	PF00076	0003676
C9IYN3_HUMAN	C9IYN3	1	80-128	NULL	PF00076	0003676
B3KPW0_HUMAN	B3KPW0	2	243-305, 92-157	46	PF00076	0003676
Q59EK7_HUMAN	Q59EK7	2	176-229, 9-70	29	PF00076	0003676
B4DN89_HUMAN	B4DN89	1	18-86	NULL	PF00076	0003676
B0QYY4_HUMAN	B0QYY4	1	94-161	NULL	PF00076	0003676
B3KT93_HUMAN	B3KT93	4	101-168, 193-261, 296-363, 13-83	47 39 33 50 30 36	PF00658 PF00076	0003723 0003676
A4QPG7_HUMAN	A4QPG7	2	93-153, 12-81	29	PF07744 PF00076	0003676
B4DF54_HUMAN	B4DF54	1	785-836	NULL	PF00076	0003676
C9JGC2_HUMAN	C9JGC2	1	83-152	NULL	PF00076	0003676
B7Z8Z7_HUMAN	B7Z8Z7	3	35-99, 115-176, 210-273	29 17 19	PF00076	0003676
A1A693_HUMAN	A1A693	1	332-400	NULL	PF07744 PF00076	0003676
Q6IRX3_HUMAN	Q6IRX3	1	12-81	NULL	PF00076	0003676
Q59FA2_HUMAN	Q59FA2	2	50-117, 155-217	25	PF00076	0003676
F5H540_HUMAN	F5H540	1	10-80	NULL	PF00076	0003676
A0AV56_HUMAN	A0AV56	1	409-477	NULL	PF00076 PF02037	0003676
B8ZZ74_HUMAN	B8ZZ74	1	3-60	NULL	PF00076	0003676
B4DLM0_HUMAN	B4DLM0	2	128-193, 225-295	19	PF00076	0003676
Q3ZCS4_HUMAN	Q3ZCS4	4	101-168, 13-83, 296-363, 193-261	32 38 44 29 28 51	PF00658 PF00076	0003723 0003676
Q32ND0_HUMAN	Q32ND0	1	101-157	NULL	PF00076	0003676
O15187_HUMAN	O15187	2	60-130, 168-232	33	PF00076	0003676
B4DUA4_HUMAN	B4DUA4	1	6-67	NULL	PF00076	0003676
F5GWK3_HUMAN	F5GWK3	1	185-249	NULL	PF00076	0003676
Q6IAM0_HUMAN	Q6IAM0	1	241-303	NULL	PF12353 PF00076	0003676
D6RA49_HUMAN	D6RA49	1	73-123	NULL	PF00076	0003676
Q53F45_HUMAN	Q53F45	2	106-171, 4-64	22	PF00076	0003676
Q8NB80_HUMAN	Q8NB80	1	13-77	NULL	PF00076 PF00098	0003676 0008270
Q5CZ66_HUMAN	Q5CZ66	1	9-73	NULL	PF00076	0003676
Q5SZQ7_HUMAN	Q5SZQ7	3	332-401, 9-76, 97-161	20 30 38	PF00076	0003676
Q8TCM0_HUMAN	Q8TCM0	1	120-187	NULL	PF00076	0003676
B4DSU6_HUMAN	B4DSU6	1	18-80	NULL	PF00076	0003676
Q6PKD2_HUMAN	Q6PKD2	1	18-79	NULL	PF00076	0003676
B4DP51_HUMAN	B4DP51	1	23-85	NULL	PF08080 PF00076	0003676
B3KUB0_HUMAN	B3KUB0	1	145-209	NULL	PF00076	0003676
E5RFP2_HUMAN	E5RFP2	1	84-145	NULL	PF00076	0003676
Q5T0W7_HUMAN	Q5T0W7	2	138-199, 58-124	22	PF00076	0003676
Q5JB52_HUMAN	Q5JB52	1	80-128	NULL	PF00076	0003676
B7Z3A4_HUMAN	B7Z3A4	1	557-622	NULL	PF04818 PF00076	0003676
B4DM51_HUMAN	B4DM51	1	51-117	NULL	PF00076	0003676
Q147Y3_HUMAN	Q147Y3	1	46-113	NULL	PF00076	0003676
PAB4L_HUMAN	P0CB38	4	12-82, 100-167, 192-259, 295-362	29 29 26 47 39 47	PF00076	0003676
Q7Z780_HUMAN	Q7Z780	1	19-68	NULL	PF00642 PF00076	0003676 0008270
B3KX96_HUMAN	B3KX96	1	18-80	NULL	PF00076	0003676
Q8N1H4_HUMAN	Q8N1H4	1	86-154	NULL	PF00076	0003676
B7ZLC0_HUMAN	B7ZLC0	1	307-371	NULL	PF01812 PF00076	0005524 0009396 0030272 0003676
Q86VG2_HUMAN	Q86VG2	2	374-433, 299-363	16	PF08075 PF00076	0003676
Q7Z2U9_HUMAN	Q7Z2U9	1	58-121	NULL	PF00076	0003676
Q8TBR3_HUMAN	Q8TBR3	1	287-365	NULL	PF00641 PF00076	0005622 0008270 0003676
E1P5S2_HUMAN	E1P5S2	2	6-63, 95-165	20	PF00076	0003676
Q8TAL0_HUMAN	Q8TAL0	1	590-641	NULL	PF00076	0003676
B4DEK2_HUMAN	B4DEK2	1	13-77	NULL	PF00076	0003676
E9PQK4_HUMAN	E9PQK4	1	19-84	NULL	PF00076	0003676
Q6N037_HUMAN	Q6N037	2	6-63, 95-165	20	PF00076	0003676
A8K9S4_HUMAN	A8K9S4	2	63-123, 142-206	27	PF00076	0003676
D6W5Y5_HUMAN	D6W5Y5	1	8-78	NULL	PF00076	0003676
F5H3W3_HUMAN	F5H3W3	1	42-98	NULL	PF00076	0003676
Q05DR1_HUMAN	Q05DR1	1	12-82	NULL	PF00076 PF00098	0003676 0008270
Q53GL4_HUMAN	Q53GL4	1	7-74	NULL	PF00658 PF00076	0003723 0003676
B3KWU8_HUMAN	B3KWU8	3	63-126, 143-204, 238-301	25 14 22	PF00076	0003676
F5H4D6_HUMAN	F5H4D6	1	160-214	NULL	PF00076	0003676
F5H7Z1_HUMAN	F5H7Z1	1	212-279	NULL	PF00076	0003676
B7Z570_HUMAN	B7Z570	1	18-79	NULL	PF00076	0003676
Q9BSV4_HUMAN	Q9BSV4	2	301-360, 226-290	16	PF08075 PF00076	0003676
Q86YK2_HUMAN	Q86YK2	1	9-79	NULL	PF00076	0003676
C9J323_HUMAN	C9J323	1	84-143	NULL	PF00076	0003676
Q549U1_HUMAN	Q549U1	1	123-191	NULL	PF00076	0003676
Q3ZB86_HUMAN	Q3ZB86	1	376-444	NULL	PF07744 PF00076	0003676
Q4VY17_HUMAN	Q4VY17	3	101-168, 193-261, 13-83	50 29 33	PF00076	0003676
D6RBZ0_HUMAN	D6RBZ0	2	73-140, 156-224	39	PF00076 PF08143	0003676
Q8N8Y7_HUMAN	Q8N8Y7	1	10-67	NULL	PF08081 PF00076	0003676
B4DSS0_HUMAN	B4DSS0	1	1281-1340	NULL	PF00076	0003676
E7EW00_HUMAN	E7EW00	1	276-348	NULL	PF00076	0003676
E9PL19_HUMAN	E9PL19	1	168-228	NULL	PF00076	0003676
Q59GA1_HUMAN	Q59GA1	1	110-178	NULL	PF00076	0003676
B4DFI3_HUMAN	B4DFI3	1	22-84	NULL	PF00076	0003676
E7ERJ7_HUMAN	E7ERJ7	3	264-331, 161-229, 13-83	51 36 31	PF00658 PF00076	0003723 0003676
F5GYB8_HUMAN	F5GYB8	1	18-78	NULL	PF00076	0003676
F5H6M0_HUMAN	F5H6M0	1	84-155	NULL	PF00076	0003676
B2R8Z8_HUMAN	B2R8Z8	3	164-229, 245-306, 340-401	20 22 19	PF00076	0003676
E9PKU1_HUMAN	E9PKU1	1	46-111	NULL	PF00076	0003676
B7ZLH9_HUMAN	B7ZLH9	1	140-207	NULL	PF00076	0003676
B3KRJ9_HUMAN	B3KRJ9	2	23-85, 184-252	23	PF00076	0003676
Q5IRN2_HUMAN	Q5IRN2	2	115-159, 12-80	35	PF00076	0003676
B1AKF7_HUMAN	B1AKF7	1	101-157	NULL	PF00076	0003676
B4DV79_HUMAN	B4DV79	1	131-181	NULL	PF08662 PF00076	0003676
A8KAM9_HUMAN	A8KAM9	1	8-78	NULL	PF00160 PF00076	0006457 0003755 0003676
D6RAF8_HUMAN	D6RAF8	1	100-167	NULL	PF00076 PF08143	0003676
F5H8B8_HUMAN	F5H8B8	1	10-80	NULL	PF00076	0003676
Q96J71_HUMAN	Q96J71	3	78-141, 1-62, 237-306	33 28 30	PF00076	0003676
B3KVW0_HUMAN	B3KVW0	1	840-891	NULL	PF00076	0003676
B3KWQ8_HUMAN	B3KWQ8	2	265-310, 168-233	23	PF00076	0003676
Q69YJ7_HUMAN	Q69YJ7	3	454-520, 881-950, 570-635	22 22 22	PF00076	0003676
B3KQ99_HUMAN	B3KQ99	1	130-187	NULL	PF00076	0003676
E9PB51_HUMAN	E9PB51	2	4-64, 81-141	42	PF00076	0003676
F5H0H3_HUMAN	F5H0H3	1	340-408	NULL	PF00076 PF02037	0003676
A6NNE8_HUMAN	A6NNE8	1	13-77	NULL	PF00076	0003676
C9JD39_HUMAN	C9JD39	1	510-573	NULL	PF04818 PF00076	0003676
E5RH24_HUMAN	E5RH24	1	13-83	NULL	PF00076	0003676
D3DPI2_HUMAN	D3DPI2	1	18-80	NULL	PF00076	0003676
E9PK21_HUMAN	E9PK21	1	8-78	NULL	PF00076	0003676
Q6P2D7_HUMAN	Q6P2D7	1	210-277	NULL	PF00076	0003676
Q69YM5_HUMAN	Q69YM5	1	68-136	NULL	PF00076	0003676
B0QYY7_HUMAN	B0QYY7	1	137-200	NULL	PF00076	0003676
B5BU15_HUMAN	B5BU15	1	4-64	NULL	PF00076	0003676
D6RBQ9_HUMAN	D6RBQ9	1	81-148	NULL	PF00076 PF08143	0003676
B4DY08_HUMAN	B4DY08	1	18-80	NULL	PF00076	0003676
E2PSN0_HUMAN	E2PSN0	1	88-139	NULL	PF00076	0003676
B4DUA9_HUMAN	B4DUA9	1	22-90	NULL	PF00076	0003676
B1AKP7_HUMAN	B1AKP7	2	193-241, 106-171	28	PF00076	0003676
Q9BTF3_HUMAN	Q9BTF3	2	88-153, 6-68	34	PF00076	0003676
Q5JPA7_HUMAN	Q5JPA7	1	317-370	NULL	PF00069 PF00076	0006468 0004672 0005524 0003676
B4DP35_HUMAN	B4DP35	1	16-84	NULL	PF00076 PF11627	0003676
B4DN88_HUMAN	B4DN88	2	64-124, 143-207	27	PF00076	0003676
B4DYA2_HUMAN	B4DYA2	2	285-339, 367-435	25	PF00076 PF05391	0003676
Q5QPL9_HUMAN	Q5QPL9	1	23-85	NULL	PF00076	0003676
B4E0W4_HUMAN	B4E0W4	1	30-90	NULL	PF00076	0003676
B7Z8M4_HUMAN	B7Z8M4	2	6-63, 95-164	20	PF00076	0003676
Q7Z3D7_HUMAN	Q7Z3D7	1	197-259	NULL	PF01585 PF00076 PF00641	0005622 0003676 0008270
Q5U0Q1_HUMAN	Q5U0Q1	1	342-396	NULL	PF02136 PF00076	0005622 0006810 0003676
A8K9A4_HUMAN	A8K9A4	1	18-80	NULL	PF00076	0003676
E7EU30_HUMAN	E7EU30	1	42-98	NULL	PF00076	0003676
B4E0B5_HUMAN	B4E0B5	1	16-84	NULL	PF00076 PF11627	0003676
E7ET15_HUMAN	E7ET15	1	275-347	NULL	PF01805 PF00076 PF08312	0006396 0003723 0003676
B4DS31_HUMAN	B4DS31	3	134-198, 431-500, 43-111	30 33 21	PF00076	0003676
B4DQX0_HUMAN	B4DQX0	3	264-331, 161-229, 13-83	51 36 31	PF00658 PF00076	0003723 0003676
E7EU33_HUMAN	E7EU33	1	42-98	NULL	PF00076	0003676
Q96B58_HUMAN	Q96B58	2	108-178, 9-77	27	PF00076	0003676
E9PID8_HUMAN	E9PID8	1	18-88	NULL	PF00076	0003676
Q15164_HUMAN	Q15164	2	107-174, 4-72	50	PF00076	0003676
B4DTC1_HUMAN	B4DTC1	1	37-102	NULL	PF00076	0003676
E7ERE4_HUMAN	E7ERE4	3	167-231, 347-408, 248-313	25 21 22	PF00076	0003676
B7ZLP5_HUMAN	B7ZLP5	1	409-477	NULL	PF00076 PF02037	0003676
Q9Y655_HUMAN	Q9Y655	3	182-250, 49-118, 472-539	24 42 39	PF00076	0003676
B1ANR0_HUMAN	B1ANR0	4	13-83, 296-363, 101-168, 193-261	32 29 34 42 50 45	PF00658 PF00076	0003723 0003676
B4DRG9_HUMAN	B4DRG9	1	592-639	NULL	PF00076	0003676
B7ZLQ8_HUMAN	B7ZLQ8	1	449-510	NULL	PF00076	0003676
E7ETJ9_HUMAN	E7ETJ9	1	60-130	NULL	PF00076	0003676
E7EUF4_HUMAN	E7EUF4	1	42-98	NULL	PF00076	0003676
B4DP00_HUMAN	B4DP00	2	199-261, 15-74	28	PF08080 PF00076	0003676
B7ZW41_HUMAN	B7ZW41	1	18-77	NULL	PF00076	0003676
B7Z876_HUMAN	B7Z876	1	524-589	NULL	PF04818 PF00076	0003676
Q6NXQ0_HUMAN	Q6NXQ0	1	18-78	NULL	PF00076	0003676
F5H0B8_HUMAN	F5H0B8	2	286-340, 368-436	25	PF00076 PF05391	0003676
Q5JQF3_HUMAN	Q5JQF3	2	140-208, 37-105	39	PF00076	0003676
A4D198_HUMAN	A4D198	1	111-178	NULL	PF00076	0003676
E1CJT3_HUMAN	E1CJT3	1	40-101	NULL	PF00076	0003676
Q86VN0_HUMAN	Q86VN0	1	241-297	NULL	PF00642 PF00076	0003676 0008270
A2A2V2_HUMAN	A2A2V2	1	267-336	NULL	PF00076	0003676
E5RJB9_HUMAN	E5RJB9	1	13-83	NULL	PF00076	0003676
Q12771_HUMAN	Q12771	2	79-146, 163-223	45	PF08143 PF00076	0003676
Q59GL1_HUMAN	Q59GL1	3	136-201, 217-278, 312-373	20 22 19	PF00076	0003676
Q96FE8_HUMAN	Q96FE8	1	362-440	NULL	PF00641 PF00076	0005622 0008270 0003676
B4E0E5_HUMAN	B4E0E5	1	9-77	NULL	PF00076	0003676

## Sheet: Unique_multiRRM_Scores
Table S2.
HumUnique	Hum RRM1 vs RRM2		Hum_Scores	MouUnique	Mou RRM1 vs RRM2		Mou_Scores	FlyUnique	Fly RRM1 vs RRM2		Fly_Scores	WormUnique	Worm RRM1 vs RRM2		Worm_Scores
ENSP00000352440	33-80	117-184	25	ENSMUSP00000066639	13-83	101-168	32	FBpp0084255	205-273	293-361	42	CE14916	19-34	42-91	18
ENSP00000383344	42-98	207-263	100	ENSMUSP00000066639	13-83	193-261	31	FBpp0112339	32-99	120-186	46	CE26612	11-73	98-160	9
ENSP00000341285	16-84	107-175	34	ENSMUSP00000066639	13-83	296-363	32	FBpp0082602	44-113	129-195	29	CE21988	42-108	134-204	29
ENSP00000383298	16-84	107-175	34	ENSMUSP00000066639	101-168	193-261	47	FBpp0085233	177-243	260-324	7	CE21988	42-108	258-319	12
ENSP00000362618	4-74	92-159	26	ENSMUSP00000066639	101-168	296-363	39	FBpp0085233	177-243	342-408	8	CE21988	134-204	258-319	30
ENSP00000281589	13-83	101-168	32	ENSMUSP00000066639	193-261	296-363	57	FBpp0085233	177-243	422-482	13	CE18030	579-620	640-705	14
ENSP00000281589	13-83	193-261	28	ENSMUSP00000111809	10-78	101-169	33	FBpp0085233	260-324	342-408	21	CE34717	90-114	289-346	24
ENSP00000281589	13-83	296-363	27	ENSMUSP00000072775	23-92	114-182	34	FBpp0085233	260-324	422-482	9	CE02193	59-128	147-215	24
ENSP00000281589	101-168	193-261	44	ENSMUSP00000071646	37-106	128-196	36	FBpp0085233	342-408	422-482	16	CE02193	59-128	240-308	20
ENSP00000281589	101-168	296-363	38	ENSMUSP00000098682	2-69	94-162	41	FBpp0072253	115-183	205-272	29	CE02193	59-128	345-413	30
ENSP00000281589	193-261	296-363	52	ENSMUSP00000098682	2-69	197-264	42	FBpp0111476	98-168	216-271	35	CE02193	147-215	240-308	37
ENSP00000352956	168-233	265-334	19	ENSMUSP00000098682	94-162	197-264	47	FBpp0075370	109-163	194-237	34	CE02193	147-215	345-413	37
ENSP00000302745	52-108	217-273	100	ENSMUSP00000050792	13-83	101-168	35	FBpp0070086	152-234	250-316	29	CE02193	240-308	345-413	42
ENSP00000302745	52-108	382-438	100	ENSMUSP00000050792	13-83	193-261	33	FBpp0070086	152-234	404-473	31	CE43237	227-296	329-392	32
ENSP00000302745	217-273	382-438	100	ENSMUSP00000050792	13-83	306-373	33	FBpp0070086	250-316	404-473	32	CE03762	4-64	114-180	14
ENSP00000362621	4-74	92-159	26	ENSMUSP00000050792	101-168	193-261	48	FBpp0082318	34-96	138-195	39	CE40238	70-136	160-226	17
				ENSMUSP00000050792	101-168	306-373	44	FBpp0076141	132-155	220-276	16	CE42017	5-35	99-127	6
				ENSMUSP00000050792	193-261	306-373	55	FBpp0099744	34-102	125-186	35	CE42017	5-35	157-209	19
				ENSMUSP00000006628	4-64	81-141	44	FBpp0070207	95-165	181-244	31	CE42017	99-127	157-209	17
				ENSMUSP00000058811	93-162	226-294	28	FBpp0111494	463-533	567-633	28	CE30079	72-140	183-236	22
				ENSMUSP00000058811	93-162	459-484	26	FBpp0082785	267-331	340-403	10	CE42199	821-853	891-913	13
				ENSMUSP00000058811	226-294	459-484	53	FBpp0082959	453-518	706-730	24
				ENSMUSP00000093293	12-61	202-262	10	FBpp0099578	119-189	205-267	36
				ENSMUSP00000079967	13-83	101-168	29	FBpp0071961	113-192	244-313	22
				ENSMUSP00000079967	13-83	193-261	34	FBpp0071961	113-192	376-431	8
				ENSMUSP00000079967	13-83	296-363	30	FBpp0071961	244-313	376-431	17
				ENSMUSP00000079967	101-168	193-261	44	FBpp0073543	28-62	80-116	11
				ENSMUSP00000079967	101-168	296-363	42	FBpp0073543	28-62	132-198	25
				ENSMUSP00000079967	193-261	296-363	48	FBpp0073543	28-62	275-344	25
				ENSMUSP00000053555	5-69	156-223	30	FBpp0073543	80-116	132-198	29
				ENSMUSP00000053555	5-69	285-351	16	FBpp0073543	80-116	275-344	32
				ENSMUSP00000053555	5-69	403-458	23	FBpp0073543	132-198	275-344	29
				ENSMUSP00000053555	5-69	763-831	24	FBpp0084669	33-101	124-190	26
				ENSMUSP00000053555	156-223	285-351	23
				ENSMUSP00000053555	156-223	403-458	28
				ENSMUSP00000053555	156-223	763-831	25
				ENSMUSP00000053555	285-351	403-458	19
				ENSMUSP00000053555	285-351	763-831	8
				ENSMUSP00000053555	403-458	763-831	30
				ENSMUSP00000049830	36-103	120-178	30

## Sheet: Orthologs_multiRRM_Scores
Table S3.
HumShared	Hum RRM1 vs RRM2		Hum_Scores	MouShared	Mou RRM1 vs RRM2		Mou_Scores	FlyShared	Fly RRM1 vs RRM2		Fly_Scores	WormShared	Worm RRM1 vs RRM2		Worm_Scores
ENSP00000284073	24-91	112-178	43	ENSMUSP00000096222	86-140	177-234	27	FBpp0085916	4-74	92-160	27	CE18963	5-73	177-239	14
ENSP00000373277	63-123	142-206	26	ENSMUSP00000096222	86-140	403-457	12	FBpp0085916	4-74	185-249	24	CE18963	5-73	281-349	28
ENSP00000352612	69-139	155-221	38	ENSMUSP00000096222	177-234	403-457	18	FBpp0085916	4-74	289-357	30	CE18963	5-73	501-554	14
ENSP00000352612	69-139	306-375	31	ENSMUSP00000104945	23-85	187-255	23	FBpp0085916	92-160	185-249	38	CE18963	5-73	643-719	13
ENSP00000352612	155-221	306-375	26	ENSMUSP00000042658	16-84	107-175	34	FBpp0085916	92-160	289-357	43	CE18963	5-73	750-820	23
ENSP00000334538	23-85	184-252	25	ENSMUSP00000089958	12-80	115-183	31	FBpp0085916	185-249	289-357	52	CE18963	177-239	281-349	11
ENSP00000261741	4-72	298-363	15	ENSMUSP00000005041	151-225	261-330	18	FBpp0077781	556-626	658-724	14	CE18963	177-239	501-554	11
ENSP00000261741	4-72	404-473	27	ENSMUSP00000005041	151-225	400-459	11	FBpp0077781	556-626	753-804	15	CE18963	177-239	643-719	17
ENSP00000261741	4-72	589-642	20	ENSMUSP00000005041	261-330	400-459	18	FBpp0077781	658-724	753-804	19	CE18963	177-239	750-820	11
ENSP00000261741	4-72	732-804	30	ENSMUSP00000001809	13-83	101-168	33	FBpp0080905	152-223	264-366	11	CE18963	281-349	501-554	14
ENSP00000261741	4-72	834-904	30	ENSMUSP00000001809	13-83	193-261	33	FBpp0076875	233-297	312-378	29	CE18963	281-349	643-719	26
ENSP00000261741	298-363	404-473	15	ENSMUSP00000001809	13-83	296-363	35	FBpp0078974	9-77	98-165	35	CE18963	281-349	750-820	21
ENSP00000261741	298-363	589-642	9	ENSMUSP00000001809	101-168	193-261	45	FBpp0074012	304-368	378-441	14	CE18963	501-554	643-719	11
ENSP00000261741	298-363	732-804	18	ENSMUSP00000001809	101-168	296-363	41	FBpp0079471	12-70	171-227	5	CE18963	501-554	750-820	22
ENSP00000261741	298-363	834-904	27	ENSMUSP00000001809	193-261	296-363	52	FBpp0083366	166-231	247-308	29	CE18963	643-719	750-820	25
ENSP00000261741	404-473	589-642	29	ENSMUSP00000066312	93-162	226-294	28	FBpp0083366	166-231	342-403	32	CE26020	7-73	125-194	32
ENSP00000261741	404-473	732-804	32	ENSMUSP00000066312	93-162	516-583	39	FBpp0083366	247-308	342-403	22	CE26020	7-73	473-541	43
ENSP00000261741	404-473	834-904	24	ENSMUSP00000066312	226-294	516-583	47	FBpp0083976	9-76	97-167	27	CE26020	125-194	473-541	36
ENSP00000261741	589-642	732-804	29	ENSMUSP00000008477	27-84	153-212	17	FBpp0083976	9-76	223-287	20	CE20412	34-103	122-190	27
ENSP00000261741	589-642	834-904	35	ENSMUSP00000066311	5-69	156-223	30	FBpp0083976	97-167	223-287	27	CE20412	34-103	215-282	25
ENSP00000261741	732-804	834-904	25	ENSMUSP00000066311	5-69	285-351	16	FBpp0077324	112-182	198-270	33	CE20412	34-103	319-387	31
ENSP00000271628	15-85	102-173	36	ENSMUSP00000066311	5-69	403-458	23	FBpp0077324	112-182	363-432	35	CE20412	122-190	215-282	33
ENSP00000364912	8-68	339-406	19	ENSMUSP00000066311	5-69	760-829	26	FBpp0077324	198-270	363-432	30	CE20412	122-190	319-387	40
ENSP00000364912	8-68	440-507	24	ENSMUSP00000066311	156-223	285-351	23	FBpp0085681	99-156	258-314	22	CE20412	215-282	319-387	47
ENSP00000364912	8-68	535-587	24	ENSMUSP00000066311	156-223	403-458	28	FBpp0085681	99-156	369-429	12	CE29126	174-240	274-343	8
ENSP00000364912	339-406	440-507	14	ENSMUSP00000066311	156-223	760-829	23	FBpp0085681	258-314	369-429	5	CE38662	31-99	112-180	31
ENSP00000364912	339-406	535-587	22	ENSMUSP00000066311	285-351	403-458	19	FBpp0072706	5-65	362-423	26	CE27708	48-114	137-207	31
ENSP00000364912	440-507	535-587	26	ENSMUSP00000066311	285-351	760-829	10	FBpp0072706	5-65	478-546	11	CE27708	48-114	243-305	31
ENSP00000322016	88-158	185-254	41	ENSMUSP00000066311	403-458	760-829	30	FBpp0072706	5-65	741-773	12	CE27708	137-207	243-305	28
ENSP00000322016	88-158	443-501	11	ENSMUSP00000084114	151-218	235-296	38	FBpp0072706	5-65	911-981	29	CE24110	5-70	876-943	16
ENSP00000322016	185-254	443-501	8	ENSMUSP00000088365	113-180	230-332	5	FBpp0072706	362-423	478-546	25	CE03763	5-65	131-196	19
ENSP00000246071	27-84	153-212	17	ENSMUSP00000093425	9-77	108-178	27	FBpp0072706	362-423	741-773	21	CE07355	28-85	145-204	10
ENSP00000221419	120-174	211-268	27	ENSMUSP00000093425	9-77	216-280	36	FBpp0072706	362-423	911-981	20	CE08718	112-170	230-335	22
ENSP00000221419	120-174	400-454	12	ENSMUSP00000093425	108-178	216-280	32	FBpp0072706	478-546	741-773	21	CE00983	44-114	130-196	31
ENSP00000221419	211-268	400-454	18	ENSMUSP00000003501	41-111	127-190	37	FBpp0072706	478-546	911-981	23	CE00983	44-114	376-444	31
ENSP00000352162	41-111	127-190	37	ENSMUSP00000003501	41-111	286-355	30	FBpp0072706	741-773	911-981	18	CE00983	130-196	376-444	31
ENSP00000352162	41-111	286-355	30	ENSMUSP00000003501	127-190	286-355	28	FBpp0082724	9-75	117-178	22	CE03111	14-74	165-234	4
ENSP00000352162	127-190	286-355	28	ENSMUSP00000105216	155-220	252-322	19	FBpp0087934	114-161	316-384	8	CE36388	202-266	283-350	10
ENSP00000348345	14-84	113-182	42	ENSMUSP00000105216	155-220	452-505	7	FBpp0087934	114-161	398-456	25	CE36388	202-266	379-440	24
ENSP00000348345	14-84	291-358	39	ENSMUSP00000105216	252-322	452-505	12	FBpp0087934	316-384	398-456	25	CE36388	283-350	379-440	14
ENSP00000348345	113-182	291-358	42	ENSMUSP00000107403	58-118	137-201	26	FBpp0072593	132-202	229-298	32	CE31214	97-165	265-333	21
ENSP00000258962	18-85	123-184	25	ENSMUSP00000007993	6-69	116-184	25	FBpp0072593	132-202	560-622	14	CE31214	97-165	414-484	23
ENSP00000351409	19-84	110-175	33	ENSMUSP00000007993	6-69	327-385	23	FBpp0072593	229-298	560-622	6	CE31214	265-333	414-484	10
ENSP00000351409	19-84	403-472	21	ENSMUSP00000007993	6-69	480-559	14	FBpp0088567	109-174	194-242	26	CE41585	58-122	144-208	36
ENSP00000351409	110-175	403-472	24	ENSMUSP00000007993	116-184	327-385	37	FBpp0082316	26-94	117-185	30	CE41585	58-122	505-575	23
ENSP00000363745	167-231	248-312	20	ENSMUSP00000007993	116-184	480-559	14	FBpp0081601	59-128	234-302	24	CE41585	144-208	505-575	27
ENSP00000363745	167-231	346-407	25	ENSMUSP00000007993	327-385	480-559	22	FBpp0081601	59-128	565-628	28	CE35148	186-246	283-351	29
ENSP00000363745	248-312	346-407	20	ENSMUSP00000030623	291-355	366-425	16	FBpp0081601	234-302	565-628	14	CE35148	186-246	391-451	18
ENSP00000295470	151-218	235-296	38	ENSMUSP00000048450	191-222	247-271	8	FBpp0085240	257-323	422-478	5	CE35148	283-351	391-451	31
ENSP00000260956	113-178	231-334	6	ENSMUSP00000048450	191-222	293-362	34	FBpp0085240	257-323	612-664	11	CE02231	176-242	261-328	10
ENSP00000244020	4-64	112-177	24	ENSMUSP00000048450	247-271	293-362	28	FBpp0085240	257-323	714-774	11	CE36374	15-85	102-172	28
ENSP00000228284	706-774	803-871	27	ENSMUSP00000005643	46-111	137-202	34	FBpp0085240	422-478	612-664	24	CE31089	11-77	125-186	19
ENSP00000361949	13-83	101-168	29	ENSMUSP00000005643	46-111	430-499	19	FBpp0085240	422-478	714-774	8	CE42671	118-181	191-251	13
ENSP00000361949	13-83	193-261	34	ENSMUSP00000005643	137-202	430-499	24	FBpp0085240	612-664	714-774	16	CE27339	186-260	293-361	20
ENSP00000361949	13-83	296-363	30	ENSMUSP00000035199	100-171	233-308	20	FBpp0076112	4-72	254-314	11	CE27339	186-260	425-481	8
ENSP00000361949	101-168	193-261	45	ENSMUSP00000045048	14-84	113-182	42	FBpp0076112	4-72	366-435	24	CE27339	293-361	425-481	14
ENSP00000361949	101-168	296-363	42	ENSMUSP00000045048	14-84	291-358	39	FBpp0076112	4-72	571-622	9	CE26949	228-300	365-421	10
ENSP00000361949	193-261	296-363	50	ENSMUSP00000045048	113-182	291-358	42	FBpp0076112	4-72	681-755	15	CE05167	595-660	685-753	21
ENSP00000253363	155-220	252-322	19	ENSMUSP00000105233	5-69	307-372	23	FBpp0076112	4-72	787-858	24	CE39251	25-93	116-184	33
ENSP00000253363	155-220	452-505	7	ENSMUSP00000105233	5-69	432-501	27	FBpp0076112	254-314	366-435	19	CE17724	36-99	171-230	15
ENSP00000253363	252-322	452-505	12	ENSMUSP00000105233	5-69	548-613	24	FBpp0076112	254-314	571-622	3	CE17724	36-99	253-311	11
ENSP00000313007	13-83	101-168	33	ENSMUSP00000105233	5-69	919-988	24	FBpp0076112	254-314	681-755	9	CE17724	171-230	253-311	23
ENSP00000313007	13-83	193-261	31	ENSMUSP00000105233	307-372	432-501	30	FBpp0076112	254-314	787-858	21	CE34752	34-96	140-197	22
ENSP00000313007	13-83	296-363	35	ENSMUSP00000105233	307-372	548-613	33	FBpp0076112	366-435	571-622	30	CE34752	34-96	325-379	5
ENSP00000313007	101-168	193-261	47	ENSMUSP00000105233	307-372	919-988	24	FBpp0076112	366-435	681-755	27	CE34752	140-197	325-379	14
ENSP00000313007	101-168	296-363	41	ENSMUSP00000105233	432-501	548-613	19	FBpp0076112	366-435	787-858	25	CE28911	145-231	248-317	27
ENSP00000313007	193-261	296-363	52	ENSMUSP00000105233	432-501	919-988	21	FBpp0076112	571-622	681-755	11	CE08369	47-116	190-258	15
ENSP00000349428	78-131	200-258	9	ENSMUSP00000105233	548-613	919-988	22	FBpp0076112	571-622	787-858	23	CE08369	47-116	387-449	25
ENSP00000349428	78-131	383-435	18	ENSMUSP00000101413	8-68	341-408	19	FBpp0076112	681-755	787-858	19	CE08369	190-258	387-449	11
ENSP00000349428	78-131	482-544	5	ENSMUSP00000101413	8-68	442-509	24	FBpp0088583	239-304	337-406	21	CE24366	104-174	209-278	28
ENSP00000349428	200-258	383-435	24	ENSMUSP00000101413	8-68	537-589	26	FBpp0088583	239-304	511-565	10	CE24366	104-174	679-735	14
ENSP00000349428	200-258	482-544	20	ENSMUSP00000101413	341-408	442-509	14	FBpp0088583	337-406	511-565	18	CE24366	209-278	679-735	10
ENSP00000349428	383-435	482-544	22	ENSMUSP00000101413	341-408	537-589	24	FBpp0088856	51-123	149-219	42	CE29337	48-115	136-202	46
ENSP00000240185	106-171	193-241	28	ENSMUSP00000101413	442-509	537-589	26	FBpp0088856	51-123	483-550	29	CE32618	33-68	293-335	13
ENSP00000355089	56-123	154-216	41	ENSMUSP00000075709	15-85	102-173	36	FBpp0088856	149-219	483-550	32	CE36103	31-97	126-188	36
ENSP00000355089	56-123	442-472	16	ENSMUSP00000103947	226-295	327-399	37	FBpp0076553	9-70	88-150	54	CE36103	31-97	431-500	19
ENSP00000355089	154-216	442-472	29	ENSMUSP00000103947	226-295	446-518	38	FBpp0082320	58-126	138-206	31	CE36103	126-188	431-500	26
ENSP00000355565	187-218	241-267	3	ENSMUSP00000103947	327-399	446-518	36	FBpp0070716	9-79	144-203	21	CE30508	137-193	248-306	28
ENSP00000355565	187-218	289-358	34	ENSMUSP00000017065	4-64	112-177	22	FBpp0082269	6-66	117-182	18	CE30508	137-193	438-493	10
ENSP00000355565	241-267	289-358	25	ENSMUSP00000101833	11-96	116-186	26	FBpp0074013	95-169	209-278	17	CE30508	137-193	540-600	3
ENSP00000351168	227-296	328-400	37	ENSMUSP00000101833	11-96	224-288	35	FBpp0074013	95-169	344-399	8	CE30508	248-306	438-493	28
ENSP00000351168	227-296	447-519	38	ENSMUSP00000101833	116-186	224-288	32	FBpp0074013	209-278	344-399	10	CE30508	248-306	540-600	15
ENSP00000351168	328-400	447-519	36	ENSMUSP00000098096	136-206	233-302	41	FBpp0070859	15-85	102-172	29	CE30508	438-493	540-600	7
ENSP00000341826	16-84	107-175	34	ENSMUSP00000098096	136-206	491-549	13	FBpp0072239	50-118	232-299	17
ENSP00000358089	11-96	116-186	26	ENSMUSP00000098096	233-302	491-549	11	FBpp0072239	50-118	381-449	11
ENSP00000358089	11-96	224-288	35	ENSMUSP00000102733	70-140	156-222	38	FBpp0072239	232-299	381-449	17
ENSP00000358089	116-186	224-288	32	ENSMUSP00000102733	70-140	308-377	31	FBpp0110257	298-364	384-448	38
ENSP00000382239	5-69	157-224	30	ENSMUSP00000102733	156-222	308-377	26	FBpp0110257	298-364	810-880	28
ENSP00000382239	5-69	286-353	24	ENSMUSP00000038256	4-64	81-141	44	FBpp0110257	384-448	810-880	23
ENSP00000382239	5-69	402-457	23	ENSMUSP00000107595	37-106	128-196	36	FBpp0080510	157-235	262-329	30
ENSP00000382239	5-69	928-997	20	ENSMUSP00000078792	18-85	123-184	25	FBpp0075557	57-119	339-408	25
ENSP00000382239	157-224	286-353	26	ENSMUSP00000019118	706-775	803-872	27	FBpp0077631	260-326	390-468	16
ENSP00000382239	157-224	402-457	28	ENSMUSP00000079070	13-83	101-168	29	FBpp0086479	281-350	382-458	35
ENSP00000382239	157-224	928-997	22	ENSMUSP00000079070	13-83	193-261	34	FBpp0086479	281-350	548-619	24
ENSP00000382239	286-353	402-457	14	ENSMUSP00000079070	13-83	296-363	30	FBpp0086479	382-458	548-619	26
ENSP00000382239	286-353	928-997	8	ENSMUSP00000079070	101-168	193-261	44
ENSP00000382239	402-457	928-997	30	ENSMUSP00000079070	101-168	296-363	42
ENSP00000310471	4-64	81-141	44	ENSMUSP00000079070	193-261	296-363	48
ENSP00000307863	151-225	261-330	18	ENSMUSP00000059330	12-81	93-153	27
ENSP00000307863	151-225	400-459	11	ENSMUSP00000101476	167-231	248-309	22
ENSP00000307863	261-330	400-459	18	ENSMUSP00000101476	167-231	343-404	25
ENSP00000313890	159-215	339-408	14	ENSMUSP00000101476	248-309	343-404	20
ENSP00000313890	159-215	420-480	8	ENSMUSP00000038113	106-171	193-242	24
ENSP00000313890	339-408	420-480	27	ENSMUSP00000031590	4-72	297-362	12
ENSP00000282574	9-77	108-178	27	ENSMUSP00000031590	4-72	402-471	24
ENSP00000282574	9-77	216-280	36	ENSMUSP00000031590	4-72	587-639	18
ENSP00000282574	108-178	216-280	32	ENSMUSP00000031590	4-72	724-796	27
ENSP00000343054	100-171	233-308	20	ENSMUSP00000031590	4-72	826-896	31
ENSP00000376309	37-106	128-196	36	ENSMUSP00000031590	297-362	402-471	4
ENSP00000349748	299-363	374-433	16	ENSMUSP00000031590	297-362	587-639	9
ENSP00000233078	12-80	115-183	31	ENSMUSP00000031590	297-362	724-796	21
ENSP00000363228	5-69	307-372	23	ENSMUSP00000031590	297-362	826-896	27
ENSP00000363228	5-69	432-501	26	ENSMUSP00000031590	402-471	587-639	28
ENSP00000363228	5-69	547-612	24	ENSMUSP00000031590	402-471	724-796	30
ENSP00000363228	5-69	859-928	24	ENSMUSP00000031590	402-471	826-896	25
ENSP00000363228	307-372	432-501	31	ENSMUSP00000031590	587-639	724-796	28
ENSP00000363228	307-372	547-612	33	ENSMUSP00000031590	587-639	826-896	37
ENSP00000363228	307-372	859-928	25	ENSMUSP00000031590	724-796	826-896	25
ENSP00000363228	432-501	547-612	22	ENSMUSP00000111483	56-123	153-215	41
ENSP00000363228	432-501	859-928	21	ENSMUSP00000111483	56-123	422-490	22
ENSP00000363228	547-612	859-928	22	ENSMUSP00000111483	153-215	422-490	25
ENSP00000223073	6-68	116-184	26	ENSMUSP00000093109	77-130	199-257	9
ENSP00000223073	6-68	337-395	25	ENSMUSP00000093109	77-130	381-433	7
ENSP00000223073	6-68	490-567	14	ENSMUSP00000093109	77-130	480-542	5
ENSP00000223073	116-184	337-395	37	ENSMUSP00000093109	199-257	381-433	24
ENSP00000223073	116-184	490-567	13	ENSMUSP00000093109	199-257	480-542	20
ENSP00000223073	337-395	490-567	25	ENSMUSP00000093109	381-433	480-542	22
ENSP00000316950	102-171	235-303	28	ENSMUSP00000090470	24-91	112-178	43
ENSP00000316950	102-171	525-592	39
ENSP00000316950	235-303	525-592	44

## Sheet: DAZ Orthologs
Table S4
	Chimpanzee					Macaque					Gorilla					Chicken					Zebrafish					Frog
	InParanoid.H.sapiens-P.troglodytes.tgz					InParanoid.H.sapiens-M.mulatta.tgz					InParanoid.G.gorilla-H.sapiens.tgz					InParanoid.G.gallus-H.sapiens.tgz					InParanoid.D.rerio-H.sapiens.tgz					InParanoid.H.sapiens-X.tropicalis.tgz
	Ortholog_group	InParanoid Best Score or Blast Score	Species	Uniprot_ID	Bootstrap_support_as_seed_ortholog	Ortholog_group	InParanoid Best Score or Blast Score	Species	Uniprot_ID	Bootstrap_support_as_seed_ortholog	Ortholog_group	InParanoid Best Score or Blast Score	Species	Uniprot_ID	Bootstrap_support_as_seed_ortholog	Ortholog_group	InParanoid Best Score or Blast Score	Species	Uniprot_ID	Bootstrap_support_as_seed_ortholog	Ortholog_group	InParanoid Best Score or Blast Score	Species	Uniprot_ID	Bootstrap_support_as_seed_ortholog	Ortholog_group	InParanoid Best Score or Blast Score	Species	Uniprot_ID	Bootstrap_support_as_seed_ortholog
BOLL Q8N9W6 (BOLL_HUMAN)	12135	587	H.sapiens	Q8N9W6	1	11313	584	H.sapiens	Q8N9W6	1	12345	558	G.gorilla	G3RCN1	1	8097	429	G.gallus	F1NDD0	1
	12135	587	P.troglodytes	H2QJ74	1	11313	584	M.mulatta	F7HR30	1	12345	558	H.sapiens	Q8N9W6	1	8097	429	H.sapiens	Q8N9W6	1
DAZL Q92904 (DAZL_HUMAN)	11774	609	H.sapiens	Q92904	1	10944	605	H.sapiens	Q92904	1	11581	611	G.gorilla	G3SGI9	1	8619	388	G.gallus	Q804A9	1	11476	155	D.rerio	Q9YGW7	1	10148	290	H.sapiens	Q92904	1
	11774	609	P.troglodytes	H2QM56	1	10944	605	M.mulatta	F6WG03	1	11581	611	H.sapiens	Q92904	1	8619	388	H.sapiens	Q92904	1	11476	155	H.sapiens	Q92904	0.99	10148	290	X.tropicalis	Q76CY5	1
DAZ3 Q9NR90 (DAZ3_HUMAN)	Additional sequence search	2425	H.sapiens	Q9NR90	Length: 510, Identity: 88.0% E-value: 0.0	Additional sequence search	1658	H.sapiens	Q9NR90	Length: 551, Identity: 82.0% E-value: 0.0	Additional sequence search	841	H.sapiens	Q9NR90	Length: 295, Identity: 83.0% E-value: 3.0×10-106											12219	88	H.sapiens	Q13117	1
			P.troglodytes	H2RB60				M.mulatta	C0KZ99				G.gorilla	G3S8R9												12219	88	H.sapiens	Q9NR90
	Additional sequence search	2114	H.sapiens	Q9NR90	Length: 438, Identity: 82.0% E-value: 0.0	Additional sequence search	1150	H.sapiens	Q9NR90	Length: 559, Identity: 49.0% E-value: 6.0×10-149																12219	88	H.sapiens	Q86SG3
			P.troglodytes	H2RB61				M.mulatta	C0KZA0																	12219	88	H.sapiens	Q9NQZ3
																										12219	88	X.tropicalis	F6SK87	1
DAZ2 Q13117 (DAZ2_HUMAN)	7204	968	H.sapiens	Q13117	0.89	Additional sequence search	1662	H.sapiens	Q13117	Length: 551, Identity: 82.0% E-value: 0.0	Additional sequence search	841	H.sapiens	Q13117	Length: 295, Identity: 83.0% E-value: 3.0×10-105											12219	88	H.sapiens	Q13117	1
	7204	968	P.troglodytes	H2RB60	1			M.mulatta	C0KZ99				G.gorilla	G3S8R9												12219	88	H.sapiens	Q86SG3
						Additional sequence search	1139	H.sapiens	Q13117	Length: 559, Identity: 46.0% E-value: 3.0×10-146																12219	88	H.sapiens	Q9NQZ3
								M.mulatta	C0KZA0																	12219	88	X.tropicalis	F6SK87	1
DAZ4 Q86SG3 (DAZ4_HUMAN)	Additional sequence search	2797	H.sapiens	Q86SG3	Length: 743, Identity: 91.0% E-value: 0.0	Additional sequence search	2418	H.sapiens	Q86SG3	Length: 551, Identity: 83.0% E-value: 0.0																12219	88	H.sapiens	Q13117	1
			P.troglodytes	H2R5R2				M.mulatta	C0KZ99																	12219	88	H.sapiens	Q9NR90
	Additional sequence search	2054	H.sapiens	Q86SG3	Length: 438, Identity: 88.0% E-value: 0.0																					12219	88	H.sapiens	Q86SG3
			P.troglodytes	H2RB61																						12219	88	H.sapiens	Q9NQZ3
	Additional sequence search	2033	H.sapiens	Q86SG3	Length: 414, Identity: 91.0% E-value: 0.0																					12219	88	X.tropicalis	F6SK87	1
			P.troglodytes	H2RB57
DAZ1 Q1RMF9 (Q1RMF9_HUMAN)	Additional sequence search	3605	H.sapiens	Q1RMF9	Length: 743, Identity: 92.0% E-value: 0.0
			P.troglodytes	H2R5R2
